# Supplementary material for: Defining cell type-specific immune responses in a mouse model of allergic contact dermatitis by single-cell transcriptomics
Source: bioRxiv preprint, doi:10.1101/2024.01.16.575925, version 3 (2024-05-14)
Supplement: Supplementary Table S3 [file 575925_file06.xlsx]

## Sheet: Sheet1
gene_id	GeneSymbol	Ctrl		IL4		IL17A		IFNγ
ENSMUSG00000026621	2019-03-01	0	0	0	0.05	0.05	0	0.23	0.03
ENSMUSG00000036469	2019-03-01	0.02	0.02	0.03	0.05	0.03	0.05	0.06	0.07
ENSMUSG00000073481	2019-03-02	6.62	7.05	6.49	5.8	7.63	7.42	8.34	8.24
ENSMUSG00000079557	2019-03-02	6.07	6.77	6.73	6.42	5.64	5.29	5.49	5.98
ENSMUSG00000032656	2019-03-03	2.3	2.35	2.1	2.24	2.75	3.11	1.63	1.86
ENSMUSG00000039372	2019-03-04	0	0.01	0	0	0	0	0	0
ENSMUSG00000023307	2019-03-05	0	0	0	0	0	0	0	0
ENSMUSG00000039100	2019-03-06	10.47	10.8	11.29	11.55	9.84	10.38	10.27	9.01
ENSMUSG00000026977	2019-03-07	8.89	8.85	8.87	8.2	8.47	8.79	8.2	7.56
ENSMUSG00000025702	2019-03-08	8.81	8.58	9.53	9.84	8.81	8.94	10.16	9.63
ENSMUSG00000040502	2019-03-09	2.64	3.06	2.24	2.42	2.29	2.45	2.4	2.08
ENSMUSG00000078627	2019-03-10	0.01	0	0.01	0.01	0	0.01	0.01	0.1
ENSMUSG00000022269	2019-03-11	0.06	0.02	0.09	0.06	0.04	0	0.04	0.04
ENSMUSG00000000486	2019-09-01	0.86	1.1	0.83	1.24	0.85	0.74	0.67	0.79
ENSMUSG00000026276	2019-09-02	1.81	1.7	1.55	1.75	1.58	1.56	1.45	1.28
ENSMUSG00000116048	2019-09-02	0	0	0	0	0	0	0	0
ENSMUSG00000022456	2019-09-03	0.62	0.4	0.41	0.58	0.69	0.71	0.42	0.27
ENSMUSG00000020486	2019-09-04	0.61	0.46	1.39	0.87	1.08	0.64	0.99	1.04
ENSMUSG00000072214	2019-09-05	6.18	5.8	5.82	6.33	5.84	6.55	4.59	4.89
ENSMUSG00000050379	2019-09-06	4.29	3.74	3.03	3.61	3.38	3.14	3.61	2.97
ENSMUSG00000001833	2019-09-07	24.95	23.32	22.41	19.83	20.81	19.67	17.4	14.88
ENSMUSG00000018398	2019-09-08	67.55	67.19	71.54	72.08	60.43	62.74	54.1	51.95
ENSMUSG00000059248	2019-09-09	41.73	42.79	41.18	43.45	39.81	40.37	36.85	35.11
ENSMUSG00000019917	2019-09-10	7.21	6.73	8	9.44	7.35	7.35	8.72	8.5
ENSMUSG00000058013	2019-09-11	67.88	69.24	70.67	72.19	52.46	55.51	69.28	67.38
ENSMUSG00000022542	2019-09-12	0	0.02	0.02	0.06	0	0.02	0	0.02
ENSMUSG00000034219	2019-09-14	0	0	0	0	0.03	0	0	0
ENSMUSG00000109644	0610005C13Rik	0.33	0.36	0.22	0.32	0.13	0.32	0.27	0.07
ENSMUSG00000108652	0610006L08Rik	0.03	0	0	0	0	0	0	0
ENSMUSG00000007777	0610009B22Rik	9.8	7.57	6.31	7.32	8.64	6.6	4.36	6.37
ENSMUSG00000086714	0610009E02Rik	0.57	0.3	0.35	0.27	0.12	0.21	0.19	0.2
ENSMUSG00000043644	0610009L18Rik	0.92	0.48	2.1	1.14	1.73	0.79	0.94	1.14
ENSMUSG00000042208	0610010F05Rik	4.65	4.87	5.77	5.92	4.13	4.2	3.34	3.25
ENSMUSG00000020831	0610010K14Rik	1.71	1.18	0.88	1.06	1.55	1.2	0.86	1.03
ENSMUSG00000089755	0610012D04Rik	0	0	0.1	0.41	0	0	0	0
ENSMUSG00000107002	0610012G03Rik	25.9	27.39	22.28	23.11	24.35	20.56	14.8	20.46
ENSMUSG00000046683	0610025J13Rik	0.2	0.27	0	0.19	0.1	0.1	0.16	0
ENSMUSG00000058706	0610030E20Rik	0.03	0.04	0.04	0.07	0.03	0.03	0.05	0.09
ENSMUSG00000099146	0610031O16Rik	0.02	0.16	0.15	0.07	0.11	0.04	0.19	0.07
ENSMUSG00000108236	0610033M10Rik	0	0	0	0	0	0	0	0
ENSMUSG00000097882	0610038B21Rik	0.89	0.53	0.53	0.59	0.33	0.55	0.68	0.63
ENSMUSG00000058812	0610039K10Rik	0.54	0.42	0.27	0.4	0.34	0.4	0.12	0.19
ENSMUSG00000089889	0610040B10Rik	0.49	0.4	0.25	0.21	0.56	0.33	0.3	0.62
ENSMUSG00000087341	0610040F04Rik	0	0	0	0.05	0.02	0	0	0
ENSMUSG00000060512	0610040J01Rik	0.05	0.02	0.02	0.07	0.04	0.02	0	0.05
ENSMUSG00000087361	0610043K17Rik	0.59	0.45	0.14	0.28	0.7	0.56	1.13	1.07
ENSMUSG00000114511	0710001A04Rik	0	0	0	0	0	0	0	0
ENSMUSG00000097863	1010001B22Rik	0.19	0	0	0.09	0.09	0	0	0.3
ENSMUSG00000097222	1010001N08Rik	0.28	0.28	0.46	0.22	0.34	0.14	0.27	0.19
ENSMUSG00000115547	1100001I12Rik	0	0	0	0	0	0	0	0
ENSMUSG00000090066	1110002E22Rik	0.2	0.21	0.11	0.19	0.13	0.21	0.42	0.41
ENSMUSG00000097134	1110002J07Rik	0.07	0.12	0.12	0.07	0	0.02	0	0.02
ENSMUSG00000071456	1110002L01Rik	1.6	1.16	0.73	1.07	1.17	0.84	1.25	1.14
ENSMUSG00000102531	1110002O04Rik	0	0.26	0.09	0.1	0.19	0	0	0
ENSMUSG00000106291	1110003F10Rik	0.96	0.19	1.02	0.5	0.28	0.77	0.23	1.08
ENSMUSG00000030663	1110004F10Rik	42.17	35.75	34.37	33.55	37.77	34.6	32.14	34.72
ENSMUSG00000107121	1110006O24Rik	0.96	0.06	0.81	0.35	0.14	0.35	0.45	0.15
ENSMUSG00000046119	1110008E08Rik	0	0	0	0	0	0	0	0
ENSMUSG00000021023	1110008L16Rik	2.1	2.3	2.28	2.52	2.35	2.03	2.5	2.16
ENSMUSG00000039195	1110008P14Rik	5.51	5.02	3.98	4.25	6.62	6.62	3.42	3.91
ENSMUSG00000045237	1110012L19Rik	10.5	11.77	8.27	8.47	9.15	9.97	8.95	11.36
ENSMUSG00000116164	1110013H19Rik	1.02	0.52	0.08	0.32	0.64	0.24	0.6	0.53
ENSMUSG00000098659	1110015O18Rik	0	0	0	0	0	0	0	0
ENSMUSG00000028441	1110017D15Rik	0.04	0	0	0.04	0	0.04	0.29	0
ENSMUSG00000085151	1110018N20Rik	0	0	0	0	0	0	0	0.22
ENSMUSG00000112289	1110019B22Rik	0	0	0	0.05	0	0	0	0
ENSMUSG00000097616	1110019D14Rik	0.85	1.09	0.93	0.75	0.8	0.78	0.4	0.75
ENSMUSG00000097047	1110020A21Rik	0.18	0.08	0.12	0.13	0.17	0.04	0.14	0.05
ENSMUSG00000068073	1110025L11Rik	0	0	0	0	0	0.27	0	0.5
ENSMUSG00000103520	1110025M09Rik	0.33	0.87	1.16	1.27	1.25	0.44	0.68	0.69
ENSMUSG00000085972	1110028F11Rik	0	0	0	0	0	0	0	0
ENSMUSG00000099139	1110028F18Rik	0	0	0	0	0	0	0.13	0
ENSMUSG00000037971	1110032A03Rik	1.71	1.66	1.58	1.13	1.84	1.57	1.38	2
ENSMUSG00000046999	1110032F04Rik	0	0.08	0	0.02	0	0	0.07	0.05
ENSMUSG00000099098	1110035H17Rik	0.23	0.08	0.08	0.09	0	0.04	0.05	0.05
ENSMUSG00000097036	1110036E04Rik	0	0	0	0	0	0	0	0
ENSMUSG00000092203	1110038B12Rik	34.33	35.42	28.64	27.92	35.1	28.81	34.94	40.88
ENSMUSG00000063236	1110038F14Rik	10.15	9.99	9.23	10.35	10.12	10.54	24.98	29.94
ENSMUSG00000085457	1110046J04Rik	0.93	0.97	0.67	0.59	1.06	0.96	1.36	1.71
ENSMUSG00000040591	1110051M20Rik	3.28	4.04	3.58	3.29	4.32	4.12	4.03	3.72
ENSMUSG00000068067	1110057P08Rik	0	0	0	0	0	0	0	0
ENSMUSG00000035171	1110059E24Rik	8.09	7.99	7.12	6.88	9.24	8.38	7.77	7.32
ENSMUSG00000032551	1110059G10Rik	1.41	1.28	1.89	1.83	1.35	1.3	1.63	1.78
ENSMUSG00000105036	1110060G06Rik	0	0	0	0	0	0	0	0
ENSMUSG00000078570	1110065P20Rik	10.17	9.76	8.15	7.98	10.53	7.81	5.41	6.75
ENSMUSG00000111857	1190001M18Rik	0	0.16	0.12	0.13	0.04	0.21	0.46	0.32
ENSMUSG00000043687	1190005I06Rik	2.84	1.33	1.97	2.11	1.38	1.7	1.71	1.74
ENSMUSG00000063320	1190007I07Rik	1.47	2.45	2.22	1.87	2.33	3.11	1.69	2.17
ENSMUSG00000110013	1190028D05Rik	0	0	0.07	0	0	0	0	0
ENSMUSG00000087684	1200007C13Rik	0.02	0.02	0.06	0.13	0.09	0.15	0.09	0.07
ENSMUSG00000097290	1300002E11Rik	1.32	1.71	1.62	1.53	1.7	1.73	1.5	1.55
ENSMUSG00000112545	1300014J16Rik	0.21	0.33	0.31	0.24	0.24	0.36	0.56	0.53
ENSMUSG00000033688	1300017J02Rik	0	0.02	0	0.08	0.01	0	0.01	0.04
ENSMUSG00000096221	1500002C15Rik	2.14	2.23	2	2.62	1.89	2.1	1.57	1.32
ENSMUSG00000097595	1500002F19Rik	0	0.08	0.21	0.13	0.04	0	0.19	0.19
ENSMUSG00000098912	1500004A13Rik	0.16	0.26	0.22	0.21	0.17	0.22	0.22	0.21
ENSMUSG00000104888	1500005C15Rik	0	0	0.02	0	0	0	0.05	0
ENSMUSG00000068099	1500009C09Rik	0	0	0	0	0.03	0	0	0
ENSMUSG00000087651	1500009L16Rik	0.69	0.49	0.68	0.75	1.31	1.01	0.59	0.59
ENSMUSG00000072694	1500011B03Rik	3.95	3.82	3.61	3.88	4.37	3.47	4.82	4.18
ENSMUSG00000097247	1500012K07Rik	0	0	0	0	0	0	0.02	0
ENSMUSG00000098702	1500015A07Rik	0.72	0.78	0.88	0.76	0.86	0.64	0.78	1.21
ENSMUSG00000094732	1500015L24Rik	0	0	0	0	0	0	0	0
ENSMUSG00000026051	1500015O10Rik	6.81	6.62	5.54	5.68	2.2	3.89	2.57	5.88
ENSMUSG00000097383	1500026H17Rik	0	0	0.02	0	0	0	0.02	0
ENSMUSG00000059631	1500035N22Rik	0	0	0	0	0.06	0	0	0
ENSMUSG00000043747	1520401A03Rik	0.04	0.06	0.01	0.01	0	0	0.01	0.01
ENSMUSG00000117232	1600002D24Rik	0	0	0	0.08	0	0	0	0.02
ENSMUSG00000035595	1600002K03Rik	7.63	8.8	8.06	6.19	13.11	10.44	7.27	9.47
ENSMUSG00000101585	1600010M07Rik	0.03	0	0	0	0	0.03	0	0
ENSMUSG00000050088	1600012H06Rik	13.94	14.92	15.22	15.12	14.6	14.43	11.59	12.87
ENSMUSG00000047661	1600012P17Rik	0	0	0	0	0	0	0	0
ENSMUSG00000054676	1600014C10Rik	6.47	7.47	6.19	5.01	6.67	7.43	8.86	8.93
ENSMUSG00000094690	1600014C23Rik	0	0	0	0	0.1	0	0.22	0
ENSMUSG00000029813	1600015I10Rik	0	0	0	0	0.02	0	0	0
ENSMUSG00000065361	1600017P15Rik	0	0	0	0	0	0	0	0
ENSMUSG00000102505	1600017P15Rik	0	0	0	0	0	0	0	0
ENSMUSG00000099429	1600019K03Rik	0.24	0	0	0.11	0	0	0	0
ENSMUSG00000097048	1600020E01Rik	1.17	1.13	1.31	1.07	1.68	1.36	1.35	1.03
ENSMUSG00000117315	1600022D10Rik	0	0	0	0	0	0	0	0
ENSMUSG00000104986	1600023N17Rik	0	0.1	0.05	0.22	0.11	0.32	0.06	0.06
ENSMUSG00000085114	1600025M17Rik	0	0	0	0	0	0	0	0
ENSMUSG00000110340	1600027J07Rik	0	0.2	0.11	0	0.55	0.33	0.47	0
ENSMUSG00000057818	1600029O15Rik	0	0	0	0	0	0	0	0.03
ENSMUSG00000029182	1700001C02Rik	0	0	0	0	0	0	0	0
ENSMUSG00000047150	1700001C19Rik	0	0	0.05	0	0	0	0.09	0
ENSMUSG00000099419	1700001D01Rik	0	0.09	0	0	0	0	0	0.1
ENSMUSG00000095384	1700001F09Rik	0	0	0	0	0	0	0	0
ENSMUSG00000087170	1700001G01Rik	0	0	0	0	0	0	0	0.03
ENSMUSG00000085984	1700001G11Rik	0.32	0.14	0.05	0.15	0.4	0.45	0.05	0.33
ENSMUSG00000103746	1700001G17Rik	0.19	0.11	0.82	0.12	0.36	0.12	0.13	0
ENSMUSG00000095040	1700001J03Rik	0.07	0	0	0.25	0	0.25	0.27	0.07
ENSMUSG00000086135	1700001J04Rik	0.12	0	0	0	0	0	0	0
ENSMUSG00000101963	1700001J11Rik	0.02	0	0	0.02	0	0.02	0	0.02
ENSMUSG00000056508	1700001K19Rik	0.71	1.35	1.8	1.26	0.95	1.19	2.31	1.67
ENSMUSG00000118314	1700001K23Rik	0.56	0.16	0.27	0.46	0.35	0.07	0.08	0.12
ENSMUSG00000075511	1700001L05Rik	0.32	0.34	0.18	0.22	0.3	0.22	0.14	0.26
ENSMUSG00000021534	1700001L19Rik	0.06	0.08	0	0	0	0	0	0
ENSMUSG00000106210	1700001N15Rik	0	0	0	0	0	0	0	0
ENSMUSG00000044320	1700001O22Rik	0.14	0	0.04	0.06	0.21	0.06	0.15	0.19
ENSMUSG00000018543	1700001P01Rik	0.18	0	0.17	0	0	0.26	0.09	0
ENSMUSG00000099391	1700003C15Rik	0	0	0	0	0	0.03	0	0
ENSMUSG00000085944	1700003D09Rik	0	0	0	0	0	0	0	0
ENSMUSG00000030030	1700003E16Rik	0.54	0.31	0.49	0.34	0.51	0.61	0.39	0.58
ENSMUSG00000095110	1700003E24Rik	0	0	0	0	0	0	0	0
ENSMUSG00000038523	1700003F12Rik	0	0.31	0.21	0.78	0.33	0.89	0.24	0.3
ENSMUSG00000087621	1700003G18Rik	0	0	0	0.03	0	0	0	0
ENSMUSG00000039174	1700003H04Rik	0.04	0	0	0	0	0	0	0.04
ENSMUSG00000107526	1700003I16Rik	0	0	0	0	0	0	0	0.06
ENSMUSG00000100372	1700003I22Rik	0	0	0	0	0	0	0	0
ENSMUSG00000101565	1700003L19Rik	0.09	0	0.04	0	0.08	0	0	0.23
ENSMUSG00000085389	1700003M07Rik	0.98	0.74	0.54	0.25	0.43	0.5	0.4	0.27
ENSMUSG00000102463	1700003N22Rik	0	0	0	0	0	0	0	0
ENSMUSG00000100727	1700003P14Rik	0	0	0	0	0	0	0	0
ENSMUSG00000027973	1700006A11Rik	0	0	0	0.03	0.02	0	0.03	0
ENSMUSG00000100274	1700006F04Rik	0	0	0	0	0	0	0	0
ENSMUSG00000102000	1700006H21Rik	0	0	0	0.17	0	0	0.09	0
ENSMUSG00000034764	1700006J14Rik	0.85	0.66	0.79	0.45	0.71	1.05	1.35	1.2
ENSMUSG00000102738	1700006P03Rik	0	0	0	0	0	0	0	0
ENSMUSG00000101234	1700007E05Rik	0	0	0	0	0	0	0	0
ENSMUSG00000100666	1700007F19Rik	0	0	0	0	0	0	0	0.04
ENSMUSG00000116556	1700007H22Rik	0	0	0	0	0	0	0	0
ENSMUSG00000086330	1700007J10Rik	0.92	1.07	0.76	0.8	0.99	1.12	1.83	1.04
ENSMUSG00000026831	1700007K13Rik	0.35	0.98	0.75	0.68	0.72	0.95	0.42	0.61
ENSMUSG00000097318	1700007L15Rik	1.39	0.88	0.7	0.22	0.73	1.1	0.24	0.32
ENSMUSG00000086613	1700007M16Rik	0	0	0	0	0	0	0	0.14
ENSMUSG00000089730	1700007P06Rik	0.14	0.12	0	0	0	0	0	0
ENSMUSG00000103452	1700008A23Rik	0	0	0	0	0	0	0	0
ENSMUSG00000104872	1700008B11Rik	0.09	0.94	0.16	0.34	0.34	0.6	0.27	0.09
ENSMUSG00000111986	1700008C04Rik	0	0	0	0	0	0	0	0
ENSMUSG00000106860	1700008H02Rik	0	0	0	0	0	0	0	0
ENSMUSG00000101225	1700008J07Rik	1.15	1.06	0.94	0.72	0.79	0.71	0.48	0.92
ENSMUSG00000101012	1700008K24Rik	0.12	0.05	0	0.06	0	0.06	0.12	0.12
ENSMUSG00000109657	1700008N11Rik	0	0	0	0	0	0	0	0
ENSMUSG00000008028	1700008O03Rik	0.02	0.01	0	0.03	0.01	0.06	0.03	0.08
ENSMUSG00000069118	1700008P02Rik	0	0	0	0.07	0	0	0	0
ENSMUSG00000101404	1700009C05Rik	0	0	0	0	0	0	0.07	0
ENSMUSG00000096573	1700009J07Rik	0	0	0.04	0	0	0	0	0
ENSMUSG00000028287	1700009N14Rik	0.14	0.16	0.17	0.13	0.17	0.13	0.14	0.19
ENSMUSG00000057047	1700010B08Rik	0	0	0	0	0.06	0.06	0.45	0
ENSMUSG00000099958	1700010B13Rik	0	0	0.05	0	0.05	0.03	0	0.06
ENSMUSG00000071721	1700010D01Rik	0	0	0	0	0	0.43	0	0
ENSMUSG00000115752	1700010G06Rik	0	0.15	0.08	0	0	0.24	0.08	0
ENSMUSG00000067101	1700010H22Rik	0	0	0	0	0	0	0	0
ENSMUSG00000100010	1700010I02Rik	0	0	0	0	0	0	0	0
ENSMUSG00000023873	1700010I14Rik	0.3	0.28	0.16	0.26	0.3	0.66	0.46	0.33
ENSMUSG00000100314	1700010J16Rik	0	0	0	0	0	0	0.06	0
ENSMUSG00000092599	1700010K23Rik	3.03	1.06	0	0.87	0.57	0.57	0	0
ENSMUSG00000085102	1700010K24Rik	0	0.44	0	0	0.24	0.48	0	0
ENSMUSG00000030636	1700010L04Rik	0.07	0.13	0	0	0.07	0.03	0	0.04
ENSMUSG00000101855	1700010N08Rik	0	0	0	0	0	0	0	0
ENSMUSG00000102099	1700011B04Rik	0	0	0	0	0	0	0	0
ENSMUSG00000108800	1700011C11Rik	0	0	0	0	0	0	0	0
ENSMUSG00000108791	1700011D18Rik	0	0	0	0	0	0	0	0
ENSMUSG00000109759	1700011L03Rik	0	0	0	0	0	0	0	0
ENSMUSG00000031682	1700011L22Rik	0.22	0.05	0.1	0.11	0.05	0.16	0.06	0.17
ENSMUSG00000079476	1700011M02Rik	0	0	0	0	0	0	0	0
ENSMUSG00000029766	1700012A03Rik	0	0	0	0.05	0	0	0.06	0
ENSMUSG00000020617	1700012B07Rik	0	0	0	0	0	0	0	0.03
ENSMUSG00000031927	1700012B09Rik	0.07	0	0	0	0.13	0.13	0.07	0.5
ENSMUSG00000086482	1700012C08Rik	0	0	0	0	0	0	0	0
ENSMUSG00000085470	1700012C14Rik	0	0	0	0	0	0	0	0
ENSMUSG00000110424	1700012D14Rik	0.27	0.19	0.06	0.31	0.31	0.25	0.29	0.2
ENSMUSG00000105023	1700012D16Rik	0	0	0	0	0	0	0	0
ENSMUSG00000101275	1700012E03Rik	0.04	0	0	0	0	0	0	0
ENSMUSG00000102069	1700012I11Rik	0	0	0	0	0	0	0	0
ENSMUSG00000107394	1700012J15Rik	0	0	0.11	0	0	0	0	0
ENSMUSG00000103545	1700012J22Rik	0	0	0	0	0	0	0	0
ENSMUSG00000028589	1700012P22Rik	0	0	0	0	0	0	0	0
ENSMUSG00000106899	1700013A02Rik	0	0	0	0	0	0	0	0
ENSMUSG00000079346	1700013D24Rik	0	0	0	0	0	0	0	0
ENSMUSG00000027886	1700013F07Rik	0.04	0.03	0.07	0	0.33	0.07	0	0.04
ENSMUSG00000041399	1700013G24Rik	0	0	0	0	0	0	0.22	0
ENSMUSG00000054727	1700013H16Rik	0	0	0	0	0	0	0	0.05
ENSMUSG00000106586	1700013M08Rik	0.04	0	0	0	0	0	0	0.04
ENSMUSG00000085801	1700013N06Rik	0	0	0	0	0	0	0	0
ENSMUSG00000051054	1700014D04Rik	0.03	0	0	0	0	0	0.02	0
ENSMUSG00000105903	1700014F14Rik	0	0	0	0	0	0	0	0
ENSMUSG00000110056	1700014L14Rik	0	0	0	0	0	0	0	0
ENSMUSG00000113696	1700015C15Rik	0	0	0	0	0	0	0	0
ENSMUSG00000104908	1700015C17Rik	0	0	0	0	0	0	0	0
ENSMUSG00000079666	1700015F17Rik	0	0	0	0.05	0	0	0.05	0
ENSMUSG00000094445	1700015G11Rik	0	0	0	0	0	0	0	0
ENSMUSG00000115761	1700015H07Rik	0	0	0	0	0	0	0	0
ENSMUSG00000110335	1700015I17Rik	0	0	0.02	0	0	0	0	0
ENSMUSG00000097671	1700015O11Rik	0	0.07	0	0	0	0	0	0
ENSMUSG00000102737	1700016A09Rik	0.27	0.18	0.12	0.13	0.32	0.45	0	0.07
ENSMUSG00000104538	1700016B01Rik	0	0	0	0	0	0	0	0
ENSMUSG00000108979	1700016B15Rik	0	0	0.07	0	0.07	0	0.24	0.08
ENSMUSG00000015962	1700016C15Rik	0	0.06	0.14	0	0.14	0.07	0	0
ENSMUSG00000031509	1700016D06Rik	0.04	0	0	0	0	0	0.07	0
ENSMUSG00000103481	1700016D08Rik	0	0	0	0	0	0	0	0
ENSMUSG00000104955	1700016F12Rik	0	0	0	0	0	0	0	0
ENSMUSG00000100625	1700016G22Rik	0	0	0.07	0	0	0	0	0
ENSMUSG00000114673	1700016H03Rik	0	0	0	0	0	0	0	0
ENSMUSG00000029320	1700016H13Rik	0	0.11	0	0	0.03	0.12	0	0
ENSMUSG00000111103	1700016J18Rik	0	0	0	0	0	0	0	0
ENSMUSG00000114563	1700016K05Rik	0	0	0	0.14	0	0.14	0.15	0.15
ENSMUSG00000053783	1700016K19Rik	0.19	0	0.17	0	0	0	0	0
ENSMUSG00000101483	1700016L21Rik	0	0	0	0	0	0	0	0
ENSMUSG00000085609	1700016P03Rik	0.92	0.81	0.48	0.63	0.68	0.63	0.2	0.82
ENSMUSG00000101894	1700016P04Rik	0	0	0	0	0	0	0	0
ENSMUSG00000032300	1700017B05Rik	11.7	10.75	10.64	12.34	12.5	11.92	11.75	12.04
ENSMUSG00000024729	1700017D01Rik	0	0	0	0	0	0	0	0
ENSMUSG00000037884	1700017G19Rik	0	0	0	0	0	0	0	0
ENSMUSG00000098727	1700017I07Rik	0	0	0	0	0.12	0	0	0
ENSMUSG00000086348	1700017J07Rik	0	0	0	0	0	0	0	0
ENSMUSG00000107232	1700017L05Rik	0	0	0	0	0	0	0	0
ENSMUSG00000105651	1700017M07Rik	0	0	0	0.12	0.11	0	0.49	0
ENSMUSG00000056912	1700017N19Rik	0	0	0.04	0	0	0	0	0
ENSMUSG00000038408	1700018A04Rik	0.05	0.01	0	0	0.01	0	0.01	0.06
ENSMUSG00000103616	1700018A14Rik	0	0	0	0	0	0	0	0
ENSMUSG00000107368	1700018A23Rik	0.43	0.37	0.78	0.55	0.27	0.81	0	0.3
ENSMUSG00000031809	1700018B08Rik	0	0	0	0	0	0	0	0
ENSMUSG00000037910	1700018B24Rik	0	0.08	0	0	0.18	0	0	0
ENSMUSG00000029620	1700018F24Rik	0	0	0	0	0	0	0	0
ENSMUSG00000109745	1700018G05Rik	0	0	0	0	0	0	0	0.15
ENSMUSG00000100075	1700018L02Rik	0.37	0.74	0.44	0.39	0.54	0.41	0.44	0.33
ENSMUSG00000046145	1700018M17Rik	0	0	0	0	0	0	0	0
ENSMUSG00000110709	1700018P08Rik	0	0	0	0	0	0	0	0
ENSMUSG00000060715	1700019A02Rik	0	0	0.2	0.07	0	0.07	0.15	0.08
ENSMUSG00000109102	1700019A23Rik	0	0	0	0	0	0	0	0
ENSMUSG00000113770	1700019C18Rik	0	0	0	0	0	0	0	0
ENSMUSG00000043629	1700019D03Rik	0.13	0.2	0.18	0.09	0.09	0.02	0.17	0.24
ENSMUSG00000086202	1700019E08Rik	0	0	0	0	0	0	0	0
ENSMUSG00000107027	1700019F05Rik	0	0	0	0	0	0	0	0
ENSMUSG00000085416	1700019G24Rik	0	0	0	0	0	0	0	0
ENSMUSG00000111489	1700019J19Rik	0	0	0.01	0.01	0	0	0.01	0
ENSMUSG00000111639	1700019L13Rik	0	0	0.03	0.07	0.02	0.02	0.02	0.05
ENSMUSG00000059695	1700019M22Rik	0	0	0	0	0	0	0	0
ENSMUSG00000026931	1700019N19Rik	0	0	0	0	0	0	0	0
ENSMUSG00000099808	1700019P21Rik	0	0	0	0	0	0	0	0
ENSMUSG00000027409	1700020A23Rik	0.38	0.07	0.42	0.88	0.22	0.37	0.16	0.64
ENSMUSG00000100937	1700020D05Rik	1.11	0.19	1.12	0.91	1.21	0.85	1.19	0.52
ENSMUSG00000113628	1700020D12Rik	0	0	0	0	0	0	0	0
ENSMUSG00000110052	1700020G03Rik	0	0	0	0	0	0	0	0.27
ENSMUSG00000101801	1700020G17Rik	0	0.03	0	0	0	0	0	0.04
ENSMUSG00000085438	1700020I14Rik	16.22	16.01	16.12	15.44	14.63	14.66	14.38	12.88
ENSMUSG00000035085	1700020L24Rik	3.9	2.18	3.07	2.91	1.94	3.09	3.04	1.4
ENSMUSG00000100146	1700020M21Rik	0	0	0	0	0	0	0	0
ENSMUSG00000050844	1700020N01Rik	0	0	0	0	0	0	0.05	0
ENSMUSG00000059690	1700020N15Rik	0	0	0	0	0	0	0	0
ENSMUSG00000100253	1700020N18Rik	0	0	0	0	0	0	0	0
ENSMUSG00000037535	1700021A07Rik	0	0.07	0	0	0	0	0	0
ENSMUSG00000105426	1700021F02Rik	0	0	0	0	0	0	0	0
ENSMUSG00000019797	1700021F05Rik	3.83	3.55	3.62	3.53	3.4	3.78	3.22	3.23
ENSMUSG00000027518	1700021F07Rik	0	0	0	0	0	0	0	0
ENSMUSG00000107053	1700021F13Rik	0	0	0.09	0	0	0.2	0	0.11
ENSMUSG00000112387	1700021G15Rik	0	0	0	0.1	0	0	0	0
ENSMUSG00000086890	1700021J08Rik	0	0.61	0.09	0.38	0.37	0.85	0	0.31
ENSMUSG00000086955	1700021L23Rik	0	0	0	0	0	0	0	0
ENSMUSG00000087343	1700021N21Rik	0	0	0	0	0	0	0	0
ENSMUSG00000096796	1700021P04Rik	0	0	0	0	0	0	0	0
ENSMUSG00000038165	1700022A21Rik	0	0	0	0	0	0	0	0
ENSMUSG00000099751	1700022A22Rik	0	0	0	0	0	0	0	0
ENSMUSG00000099983	1700022E09Rik	0	0	0	0	0	0	0	0
ENSMUSG00000112581	1700022H01Rik	0.29	0	0	0	0	0	0	0.15
ENSMUSG00000099360	1700022H16Rik	0	0	0	0	0	0	0	0
ENSMUSG00000028451	1700022I11Rik	0.1	0.04	0.07	0.07	0.17	0.07	0.06	0.05
ENSMUSG00000097523	1700022N22Rik	0.35	0.24	0.35	0.3	0.39	0.33	0.21	0.51
ENSMUSG00000117050	1700023B13Rik	1.9	1.76	0.45	0.94	1.54	1.08	3.27	1.58
ENSMUSG00000087393	1700023C21Rik	0	0	0	0	0	0	0	0
ENSMUSG00000100000	1700023F02Rik	0	0	0	0	0	0	0	0
ENSMUSG00000020940	1700023F06Rik	0.08	0.07	0.07	0.15	0.07	0.07	0.28	0.12
ENSMUSG00000103503	1700023G09Rik	0	0	0	0	0	0	0	0
ENSMUSG00000089827	1700023H06Rik	0.11	0.1	0.1	0.1	0	0.31	0.17	0.11
ENSMUSG00000052334	1700024B05Rik	0	0	0	0.03	0	0	0	0
ENSMUSG00000099994	1700024B18Rik	0	0	0	0	0	0	0	0
ENSMUSG00000072473	1700024G13Rik	0	0	0	0	0	0	0	0
ENSMUSG00000113825	1700024I08Rik	0	0	0	0.06	0	0	0	0
ENSMUSG00000069890	1700024J04Rik	0	0	0	0	0	0	0	0
ENSMUSG00000045022	1700024P04Rik	0	0	0	0	0	0	0	0
ENSMUSG00000106947	1700025A08Rik	0	0	0	0	0	0	0	0
ENSMUSG00000101113	1700025B11Rik	0	0	0	0	0	0	0	0
ENSMUSG00000078935	1700025C18Rik	0	0	0	0	0	0	0	0
ENSMUSG00000086760	1700025D23Rik	0	0	0	0	0	0	0	0
ENSMUSG00000024728	1700025F22Rik	0	0	0	0	0	0	0	0
ENSMUSG00000100558	1700025F24Rik	0	0	0	0	0	0	0	0
ENSMUSG00000032666	1700025G04Rik	2.49	2.24	3.01	2.93	1.64	2.16	2.07	2.06
ENSMUSG00000101888	1700025H01Rik	0	0	0.19	0	0	0	0	0
ENSMUSG00000108409	1700025J12Rik	0	0	0	0	0	0	0	0
ENSMUSG00000112482	1700025K04Rik	0	0	0	0	0	0	0	0
ENSMUSG00000099747	1700025K24Rik	0	0	0	0	0	0	0	0
ENSMUSG00000109962	1700025L06Rik	0	0	0	0	0	0	0	0
ENSMUSG00000100175	1700025M24Rik	0	0	0	0	0	0	0	0.08
ENSMUSG00000090200	1700025N21Rik	0	0.07	0	0	0.08	0	0	0
ENSMUSG00000100121	1700025N23Rik	0	0	0	0.12	0	0	0.32	0.13
ENSMUSG00000028244	1700025O08Rik	0	0	0	0	0	0	0	0
ENSMUSG00000086379	1700026D11Rik	0	0	0	0	0	0	0	0
ENSMUSG00000101854	1700026F02Rik	0	0	0	0	0	0.1	0	0
ENSMUSG00000073976	1700026J12Rik	0	0	0	0	0	0	0	0
ENSMUSG00000097716	1700026J14Rik	0	0.25	0	0	0	0.14	0	0
ENSMUSG00000114681	1700026N04Rik	0	0	0.08	0	0.08	0	0.09	0
ENSMUSG00000084864	1700027A07Rik	0	0	0	0.12	0.12	0	0	0
ENSMUSG00000101968	1700027A15Rik	0	0	0	0.04	0	0	0	0
ENSMUSG00000107737	1700027F06Rik	0	0	0	0	0	0	0	0
ENSMUSG00000100911	1700027F09Rik	0	0	0.07	0	0	0	0	0
ENSMUSG00000100799	1700027H10Rik	0	0	0	0	0	0	0	0
ENSMUSG00000098304	1700027I24Rik	0.08	0	0.07	0	0	0	0	0
ENSMUSG00000111422	1700027J07Rik	0	0	0	0	0.02	0	0	0
ENSMUSG00000099417	1700028B04Rik	0	0	0	0	0	0	0	0
ENSMUSG00000101683	1700028D13Rik	0	0	0	0	0	0	0	0
ENSMUSG00000097321	1700028E10Rik	0.08	0.06	0.05	0.04	0.04	0.01	0.03	0.01
ENSMUSG00000056821	1700028I16Rik	0	0.09	0	0	0.15	0.05	0.11	0.33
ENSMUSG00000038782	1700028J19Rik	0.23	0.18	0.17	0.11	0.07	0.31	0.26	0.07
ENSMUSG00000089798	1700028K03Rik	0.01	0.01	0	0.02	0.01	0.01	0	0.03
ENSMUSG00000101334	1700028M03Rik	0.24	0	0	0	0	0.23	0	0
ENSMUSG00000078635	1700028N14Rik	0	0	0	0	0.07	0.07	0	0
ENSMUSG00000033053	1700028P14Rik	0	0	0	0.12	0.18	0.06	0	0.07
ENSMUSG00000086823	1700028P15Rik	0	0	0	0	0	0	0	0
ENSMUSG00000100759	1700029B22Rik	0	0	0	0	0	0.08	0	0
ENSMUSG00000102834	1700029B24Rik	0	0	0	0	0.11	0	0.35	0
ENSMUSG00000100557	1700029E06Rik	0	0	0	0	0.07	0	0	0
ENSMUSG00000052075	1700029F12Rik	0	0	0.05	0	0.09	0.09	0	0
ENSMUSG00000031452	1700029H14Rik	0.08	0.1	0.07	0.08	0.04	0.15	0.08	0
ENSMUSG00000044916	1700029I15Rik	0.63	0.44	0.42	0.36	0.52	0.56	0.47	0.74
ENSMUSG00000099968	1700029J03Rik	0	0	0	0	0	0	0	0
ENSMUSG00000071103	1700029J07Rik	0.52	0.44	0.57	0.38	0.41	0.34	0.51	0.37
ENSMUSG00000101189	1700029M03Rik	0	0	0	0	0	0	0	0
ENSMUSG00000086788	1700029M20Rik	0.02	0	0.02	0.02	0.04	0.02	0.02	0
ENSMUSG00000098144	1700029N11Rik	0	0	0	0	0	0	0	0
ENSMUSG00000061633	1700029P11Rik	0	0.1	0	0	0	0	0	0
ENSMUSG00000085333	1700030A11Rik	0.06	0	0	0	0	0	0	0.07
ENSMUSG00000091071	1700030C10Rik	0.04	0.37	0.04	0.07	0.18	0.15	0.35	0.08
ENSMUSG00000099759	1700030C10Rik	1.34	1.23	0.48	0.88	0.8	0.53	0.3	0.54
ENSMUSG00000086459	1700030C12Rik	0	0.09	0	0	0	0	0	0
ENSMUSG00000087148	1700030C14Rik	0	0	0	0	0	0	0	0
ENSMUSG00000112619	1700030E10Rik	0	0	0	0	0	0	0	0
ENSMUSG00000099869	1700030F04Rik	0	0	0	0	0	0	0	0
ENSMUSG00000103387	1700030I03Rik	0	0	0	0	0	0	0	0
ENSMUSG00000031847	1700030J22Rik	0.51	0.18	0.47	0.2	0.54	0.31	0.48	0.53
ENSMUSG00000052794	1700030K09Rik	3.39	3.3	3.07	2.64	3.39	2.75	3.41	2.86
ENSMUSG00000099508	1700030L20Rik	0	0	0	0	0	0	0	0
ENSMUSG00000113179	1700030L22Rik	0	0	0	0	0	0	0.07	0
ENSMUSG00000097424	1700030M09Rik	0	0	0	0.05	0.15	0	0.05	0.05
ENSMUSG00000100969	1700030N03Rik	0	0	0	0	0.01	0	0	0
ENSMUSG00000106800	1700030N18Rik	0	0	0	0	0	0	0	0
ENSMUSG00000100198	1700030O20Rik	0	0	0	0	0	0	0	0
ENSMUSG00000092239	1700031A10Rik	0	0	0	0	0	0	0	0
ENSMUSG00000032894	1700031F05Rik	0	0	0	0	0	0	0	0
ENSMUSG00000047046	1700031F10Rik	0	0	0	0	0	0	0	0
ENSMUSG00000099863	1700031L13Rik	0	0	0	0	0	0	0	0
ENSMUSG00000099353	1700031M16Rik	0	0.06	0	0.07	0	0.03	0.03	0
ENSMUSG00000100315	1700031P21Rik	0	0	0	0	0	0	0	0
ENSMUSG00000097302	1700034B16Rik	0	0	0	0	0	0	0	0
ENSMUSG00000024532	1700034E13Rik	0	0	0.42	0	0	0	0	0
ENSMUSG00000097962	1700034G24Rik	0	0	0	0	0	0	0	0
ENSMUSG00000055833	1700034H15Rik	0	0	0	0	0	0	0	0
ENSMUSG00000074619	1700034I23Rik	0	0	0	0	0	0	0	0
ENSMUSG00000103287	1700034J04Rik	0	0	0	0	0	0	0	0
ENSMUSG00000040163	1700034J05Rik	0	0	0	0	0	0	0	0
ENSMUSG00000100294	1700034K08Rik	0	0	0	0	0	0	0	0
ENSMUSG00000097893	1700034P13Rik	0.17	0.22	0.18	0.28	0.03	0.14	0.15	0.11
ENSMUSG00000095956	1700036A12Rik	0	0	0	0.15	0	0	0.03	0
ENSMUSG00000099995	1700036G14Rik	0	0	0	0.1	0	0	0	0
ENSMUSG00000086185	1700036O09Rik	0	0	0	0	0	0	0	0
ENSMUSG00000085542	1700037C06Rik	0	0	0	0	0	0	0	0
ENSMUSG00000005983	1700037C18Rik	0.56	0.66	0.56	0.47	0.28	0.77	0.31	0.57
ENSMUSG00000114125	1700037F03Rik	0	0.14	0	0	0	0.15	0	0
ENSMUSG00000097540	1700037F24Rik	0	0	0	0	0	0	0.06	0
ENSMUSG00000027327	1700037H04Rik	11.1	13.31	9.99	10.39	10.24	9.57	8.85	10.8
ENSMUSG00000092369	1700039E22Rik	0	0	0	0	0	0	0	0
ENSMUSG00000102536	1700039I01Rik	0	0	0	0	0	0	0	0
ENSMUSG00000097933	1700039M10Rik	0	0.09	0.1	0	0	0	0	0
ENSMUSG00000104086	1700039M15Rik	0	0	0	0	0	0	0	0
ENSMUSG00000097515	1700040D17Rik	0	0	0	0	0	0	0.06	0
ENSMUSG00000113997	1700040E09Rik	0	0	0	0	0	0	0	0
ENSMUSG00000100667	1700040F15Rik	0	0	0	0	0	0	0	0
ENSMUSG00000101568	1700040F17Rik	0	0	0	0	0	0	0	0
ENSMUSG00000103840	1700040K01Rik	0	0	0	0	0	0	0	0
ENSMUSG00000107406	1700040L08Rik	0.11	0	0	0	0	0	0.32	0
ENSMUSG00000116260	1700041B01Rik	0	0	0	0	0	0	0	0
ENSMUSG00000100282	1700041C23Rik	0	0	0	0	0	0	0	0
ENSMUSG00000054822	1700041G16Rik	0	0.03	0.14	0.03	0.15	0.03	0.06	0.23
ENSMUSG00000104845	1700041I07Rik	0	0	0	0	0	0	0	0
ENSMUSG00000087010	1700041M05Rik	0	0	0	0	0	0	0	0
ENSMUSG00000100857	1700041M19Rik	0	0	0	0	0	0	0	0
ENSMUSG00000105991	1700042D02Rik	0	0	0	0	0	0	0	0
ENSMUSG00000078593	1700042G07Rik	0	0	0	0	0	0	0.15	0
ENSMUSG00000087044	1700042G15Rik	0	0	0	0	0	0	0	0
ENSMUSG00000112878	1700042O05Rik	0	0	0	0	0	0	0	0
ENSMUSG00000086391	1700042O10Rik	0	0	0.05	0.05	0.15	0.05	0	0.05
ENSMUSG00000099911	1700044C05Rik	0	0	0	0	0	0.06	0	0
ENSMUSG00000100297	1700044K03Rik	0	0	0	0	0	0	0	0
ENSMUSG00000078492	1700045H11Rik	0	0	0	0	0	0	0	0
ENSMUSG00000104526	1700045I11Rik	0	0	0	0	0	0	0	0
ENSMUSG00000085561	1700046C09Rik	0	0	0	0	0	0	0	0
ENSMUSG00000085437	1700047A11Rik	0	0	0	0	0	0	0	0
ENSMUSG00000115294	1700047E10Rik	0	0	0	0	0	0	0	0
ENSMUSG00000085549	1700047F07Rik	0	0	0	0	0	0	0	0
ENSMUSG00000099349	1700047G03Rik	0	0	0	0	0	0	0.04	0
ENSMUSG00000110717	1700047G07Rik	0	0	0	0	0	0	0	0
ENSMUSG00000094103	1700047I17Rik2	0.6	0.61	0.75	0.59	0.39	0.64	0.62	0.53
ENSMUSG00000087347	1700047K16Rik	0.19	0.28	0.29	0.37	0.54	0.49	0.39	0.33
ENSMUSG00000101762	1700047L14Rik	0	0	0	0	0	0	0	0
ENSMUSG00000100147	1700047M11Rik	0	0	0	0	0	0.02	0	0
ENSMUSG00000102356	1700047N06Rik	0	0	0	0	0	0	0	0
ENSMUSG00000109594	1700047O18Rik	0	0	0.14	0	0	0	0	0
ENSMUSG00000105274	1700048F04Rik	0	0	0	0	0	0.05	0	0
ENSMUSG00000085637	1700048M11Rik	0.82	1.03	0.21	0.56	0.33	0.67	1.31	2.31
ENSMUSG00000043773	1700048O20Rik	0.46	0.5	0.5	0.65	0.48	0.72	0.94	0.7
ENSMUSG00000112333	1700048P04Rik	0	0	0	0	0	0	0	0
ENSMUSG00000085077	1700049E15Rik	0	0	0	0	0	0	0	0
ENSMUSG00000079271	1700049E17Rik1	0	0	0	0	0	0.03	0	0
ENSMUSG00000090440	1700049E17Rik2	0	0	0	0	0	0	0	0
ENSMUSG00000101553	1700049E22Rik	0	0	0	0	0	0	0	0
ENSMUSG00000043859	1700049L16Rik	0	0	0	0	0	0	0	0
ENSMUSG00000086951	1700051A21Rik	0	0	0	0	0	0	0	0
ENSMUSG00000108263	1700051K13Rik	0	0	0	0	0	0.23	0	0
ENSMUSG00000103341	1700051O22Rik	0.09	0	0	0	0	0	0	0
ENSMUSG00000105297	1700052H01Rik	0.06	0.1	0	0	0	0	0.11	0
ENSMUSG00000101912	1700052I22Rik	0	0	0	0	0	0	0	0
ENSMUSG00000099681	1700052K11Rik	3.08	2.6	2.4	2.22	2.82	2.7	1.8	2.4
ENSMUSG00000099988	1700054A03Rik	0	0	0.04	0.03	0	0	0	0
ENSMUSG00000097001	1700054K02Rik	0	0	0	0	0	0	0	0
ENSMUSG00000100219	1700054K19Rik	0	0	0	0	0	0	0	0
ENSMUSG00000085889	1700054M17Rik	0.38	0.11	0	0	0.12	0.49	0.26	0.66
ENSMUSG00000111753	1700054O05Rik	0	0	0	0	0	0	0	0
ENSMUSG00000104183	1700054O19Rik	0	0.06	0	0	0	0	0	0.07
ENSMUSG00000093616	1700055C04Rik	0	0	0	0	0	0	0	0
ENSMUSG00000070997	1700055D18Rik	0.34	0.15	0.14	0.21	0.17	0.2	0.23	0.38
ENSMUSG00000044854	1700056E22Rik	0.45	0.27	0.33	0.34	0.42	0.47	0.18	0.19
ENSMUSG00000084792	1700056N10Rik	0.27	0.19	0.2	0.1	0.05	0.1	0.28	0.28
ENSMUSG00000074139	1700057G04Rik	0	0	0	0	0	0	0.15	0.06
ENSMUSG00000084757	1700057H15Rik	0	0	0	0.09	0	0	0	0
ENSMUSG00000086007	1700057H21Rik	0	0.07	0	0	0	0	0	0.08
ENSMUSG00000089636	1700058P15Rik	1.52	1.57	2.27	2.11	0.91	1.7	2.95	0.57
ENSMUSG00000086887	1700060C16Rik	0	0.15	0	0	0	0	0	0
ENSMUSG00000078957	1700060C20Rik	0	0	0	0	0	0	0	0
ENSMUSG00000084970	1700060J05Rik	0.75	0.7	0.64	0.46	0.25	0.66	0.77	0.44
ENSMUSG00000099407	1700060O08Rik	0	0	0	0	0	0	0	0
ENSMUSG00000102060	1700061E17Rik	0	0	0	0	0	0	0	0
ENSMUSG00000085759	1700061E18Rik	0	0	0	0	0	0	0	0
ENSMUSG00000085580	1700061F12Rik	0	0	0	0	0	0	0	0
ENSMUSG00000024209	1700061G19Rik	0.22	0.17	0.09	0.07	0.09	0.28	0.14	0.16
ENSMUSG00000084948	1700061H18Rik	0	0	0.1	0	0	0.05	0	0
ENSMUSG00000028009	1700061I17Rik	0	0	0	0	0	0	0.06	0
ENSMUSG00000086366	1700061J23Rik	0	0	0	0	0	0	0	0
ENSMUSG00000110464	1700061N14Rik	0	0	0	0	0	0	0	0
ENSMUSG00000114390	1700062C10Rik	0	0	0	0	0	0	0	0
ENSMUSG00000100062	1700063A18Rik	0	0	0	0	0	0	0	0
ENSMUSG00000100837	1700063D05Rik	0.04	0	0	0	0	0	0.15	0
ENSMUSG00000040657	1700063H04Rik	0	0	0	0	0	0	0	0
ENSMUSG00000099266	1700063H06Rik	0	0	0	0	0	0	0	0
ENSMUSG00000103463	1700063I16Rik	0	0	0	0	0	0	0	0.1
ENSMUSG00000117080	1700063J08Rik	0.1	0.36	0	0	0	0.2	0	0
ENSMUSG00000102036	1700063K16Rik	0	0	0	0	0	0	0	0
ENSMUSG00000101978	1700063O14Rik	0	0	0	0	0	0	0	0
ENSMUSG00000082766	1700064H15Rik	0	0	0.66	0	0	0.14	0.15	0
ENSMUSG00000100681	1700064J06Rik	0	0	0	0	0	0	0	0
ENSMUSG00000100211	1700064M15Rik	0	0.08	0.08	0	0	0	0	0
ENSMUSG00000096655	1700065D16Rik	0	0	0.05	0	0.02	0	0.04	0.06
ENSMUSG00000099435	1700065I16Rik	0	0	0	0	0	0	0	0
ENSMUSG00000107341	1700065J11Rik	0	0	0	0	0	0	0	0
ENSMUSG00000100872	1700065J18Rik	0	0.13	0.13	0.42	0	0	0.29	0
ENSMUSG00000107408	1700065L07Rik	0	0	0	0	0	0	0	0
ENSMUSG00000100134	1700065O20Rik	0	0	0	0	0	0	0	0
ENSMUSG00000101634	1700066B17Rik	0	0	0	0	0.15	0	0	0
ENSMUSG00000073598	1700066B19Rik	0	0	0.07	0	0	0	0	0
ENSMUSG00000101810	1700066C05Rik	0	0	0	0	0	0	0	0
ENSMUSG00000097717	1700066J03Rik	0	0	0	0	0	0	0	0
ENSMUSG00000038323	1700066M21Rik	3.29	4.03	3.96	3.5	3.49	3.24	2.7	2.46
ENSMUSG00000099605	1700066N21Rik	0	0	0	0	0	0	0	0
ENSMUSG00000085800	1700066O22Rik	0	0	0	0	0.02	0	0	0
ENSMUSG00000099378	1700067G17Rik	0	0	0	0	0	0	0	0
ENSMUSG00000046408	1700067K01Rik	0.15	0.58	0.24	0.14	0.19	0.28	0.36	0.45
ENSMUSG00000021545	1700067P10Rik	0	0	0	0	0	0	0	0
ENSMUSG00000053081	1700069B07Rik	0.18	0.64	0.28	0.17	0.23	0.52	0.37	0.06
ENSMUSG00000042184	1700069L16Rik	0	0	0	0	0	0	0	0
ENSMUSG00000107637	1700069P05Rik	0	0	0	0	0	0	0	0
ENSMUSG00000086376	1700071G01Rik	0	0	0	0	0	0	0	0
ENSMUSG00000080980	1700071K01Rik	0	0	0	0	0	0	0	0
ENSMUSG00000090307	1700071M16Rik	0	0	0	0.02	0	0	0.02	0
ENSMUSG00000100487	1700072B07Rik	0	0	0	0	0	0	0	0
ENSMUSG00000101702	1700072G22Rik	0	0	0	0	0	0.2	0	0
ENSMUSG00000107744	1700072O05Rik	0	0	0	0	0	0	0	0
ENSMUSG00000087204	1700073E17Rik	0	0.04	0.04	0	0.13	0.09	0	0
ENSMUSG00000102231	1700074A21Rik	0	0	0	0	0	0	0	0
ENSMUSG00000099872	1700074H08Rik	0	0	0.09	0	0	0	0	0
ENSMUSG00000029883	1700074P13Rik	0	0	0	0	0	0	0	0.06
ENSMUSG00000086771	1700080G11Rik	0	0	0.12	0	0	0	0	0
ENSMUSG00000084859	1700080N15Rik	0	0	0	0	0	0.04	0	0
ENSMUSG00000031118	1700080O16Rik	0	0	0	0	0	0	0	0
ENSMUSG00000105673	1700081B01Rik	0	0	0	0	0	0	0	0
ENSMUSG00000100573	1700081H04Rik	0	0	0	0	0	0	0	0
ENSMUSG00000113209	1700081N11Rik	0	0	0	0	0	0	0	0
ENSMUSG00000023737	1700082M22Rik	0	0	0.02	0	0	0.05	0	0
ENSMUSG00000100668	1700083H02Rik	0	0	0	0	0	0	0	0
ENSMUSG00000086016	1700084C06Rik	0	0	0	0	0	0	0	0
ENSMUSG00000114333	1700084D21Rik	0	0	0	0	0	0	0	0
ENSMUSG00000100747	1700084E18Rik	0.56	0.35	0.51	0.84	0.56	0.45	0.24	0.29
ENSMUSG00000099639	1700084F23Rik	0	0	0	0	0	0	0	0
ENSMUSG00000058101	1700084J12Rik	0	0	0	0.05	0	0	0	0
ENSMUSG00000057805	1700084M14Rik	0	0	0	0	0	0	0	0
ENSMUSG00000100890	1700085C21Rik	0	0	0	0	0	0	0	0
ENSMUSG00000115693	1700085D07Rik	0	0	0	0	0	0	0	0
ENSMUSG00000020548	1700086D15Rik	0	0	0	0	0	0	0.05	0
ENSMUSG00000071265	1700086L19Rik	0.53	0.6	0.19	0.2	0.6	0.35	0.22	0.11
ENSMUSG00000097080	1700086O06Rik	0.93	0.74	0.85	1.1	0.82	0.67	0.74	1.08
ENSMUSG00000085085	1700086P04Rik	0.06	0.1	0	0.05	0	0	0.11	0.29
ENSMUSG00000115099	1700087I21Rik	0.18	0.17	0.15	0.38	0.23	0.09	0.31	0.1
ENSMUSG00000115723	1700087M22Rik	0	0	0	0	0	0	0	0
ENSMUSG00000033029	1700088E04Rik	0.13	0.12	0.13	0.34	0.2	0.23	0.21	0.22
ENSMUSG00000090462	1700091H14Rik	0	0	0	0.04	0	0	0	0
ENSMUSG00000086781	1700092C02Rik	0.16	0	0	0	0	0	0	0
ENSMUSG00000092499	1700092C10Rik	0	0	0	0	0	0	0	0
ENSMUSG00000085353	1700092C17Rik	0	0	0	0	0	0	0	0
ENSMUSG00000111487	1700092E16Rik	0	0.26	0	0.22	0.21	0	0	0
ENSMUSG00000084811	1700092E19Rik	0	0	0.03	0	0	0	0	0
ENSMUSG00000078600	1700092K14Rik	0	0	0	0	0	0	0	0
ENSMUSG00000090840	1700092M07Rik	0.11	0.2	0.2	0.11	0	0.11	0.57	0.81
ENSMUSG00000117289	1700093J21Rik	0.35	1.46	0.56	0.17	0.25	0.92	0.63	0.36
ENSMUSG00000020286	1700093K21Rik	0	0.12	0	0.05	0.05	0.03	0	0.12
ENSMUSG00000101695	1700094J05Rik	0	0	0	0	0	0	0	0
ENSMUSG00000105337	1700094M23Rik	0	0	0	0	0	0	0	0
ENSMUSG00000107895	1700094M24Rik	0	0	0	0	0	0	0	0
ENSMUSG00000100430	1700095A13Rik	0	0	0	0.01	0	0	0	0
ENSMUSG00000086046	1700095A21Rik	0	0	0	0	0	0	0	0
ENSMUSG00000098230	1700095B10Rik	0	0	0	0	0	0	0	0
ENSMUSG00000085407	1700095J03Rik	0.13	0.11	0	0.06	0.06	0	0.03	0
ENSMUSG00000084861	1700095J07Rik	0	0	0	0.04	0	0	0	0
ENSMUSG00000084804	1700095J12Rik	0	0.07	0	0	0	0	0	0
ENSMUSG00000108505	1700095K22Rik	0	0	0	0	0	0	0	0
ENSMUSG00000099630	1700096J18Rik	0	0	0	0	0	0	0	0
ENSMUSG00000101856	1700096K18Rik	1.72	0.86	1.36	0.86	0.88	1.45	0.92	1.34
ENSMUSG00000108194	1700097M23Rik	0	0	0	0	0	0.04	0.04	0.04
ENSMUSG00000099474	1700097N02Rik	0	0	0	0	0	0	0	0
ENSMUSG00000091906	1700099I09Rik	0	0.06	0	0	0	0	0.07	0
ENSMUSG00000115372	1700100I10Rik	0	0	0	0	0.04	0	0	0.04
ENSMUSG00000101051	1700100L14Rik	0	0	0	0	0	0	0.14	0
ENSMUSG00000097675	1700101I11Rik	0.21	0.03	0.22	0.06	0.29	0.32	0.16	0.38
ENSMUSG00000045815	1700101I19Rik	0	0	0	0	0	0.11	0	0
ENSMUSG00000102096	1700101O22Rik	0	0	0	0	0	0	0	0
ENSMUSG00000108229	1700102F20Rik	0	0	0	0	0	0	0	0
ENSMUSG00000116852	1700102H20Rik	0	0	0	0	0.29	0	0	0.1
ENSMUSG00000032611	1700102P08Rik	0.32	0.36	0	0.35	0.56	0.31	0.52	0.48
ENSMUSG00000049476	1700104B16Rik	0.16	0	0	0	0	0	0	0
ENSMUSG00000112821	1700104L18Rik	0	0	0	0	0	0	0	0.1
ENSMUSG00000113747	1700105G05Rik	0	0	0	0	0	0	0	0
ENSMUSG00000099923	1700105P06Rik	1.66	1.6	3.55	2.29	1.46	2.95	1.64	2.18
ENSMUSG00000117394	1700106O07Rik	0	0	0	0	0	0	0	0
ENSMUSG00000101009	1700108F19Rik	0	0.02	0.03	0.02	0.12	0.07	0	0.02
ENSMUSG00000100585	1700108J01Rik	0	0	0	0	0	0	0	0
ENSMUSG00000106034	1700108N06Rik	0	0	0	0	0	0	0	0
ENSMUSG00000084837	1700108N11Rik	0	0	0	0	0	0	0	0
ENSMUSG00000101505	1700109G14Rik	0	0.07	0	0.04	0	0	0	0.04
ENSMUSG00000085044	1700109G15Rik	0	0	0	0	0	0	0	0
ENSMUSG00000008307	1700109H08Rik	0.69	0.67	0.82	0.46	0.8	0.92	0.59	0.79
ENSMUSG00000101261	1700109I08Rik	0	0	0	0	0	0	0	0
ENSMUSG00000097267	1700109K24Rik	3.51	4.67	3.45	4.49	3.52	3.37	5.01	4.34
ENSMUSG00000099384	1700110C19Rik	0.08	0	0.15	0.38	0.15	0.15	0	0.33
ENSMUSG00000079407	1700110I01Rik	0	0	0.01	0	0	0	0	0
ENSMUSG00000108490	1700110I07Rik	0	0	0	0	0.06	0	0	0
ENSMUSG00000087047	1700110K17Rik	0.11	0	0	0	0	0	0	0
ENSMUSG00000029837	1700111E14Rik	0	0	0	0	0	0	0	0
ENSMUSG00000100511	1700111N16Rik	0	0	0	0	0	0	0	0.05
ENSMUSG00000091329	1700112D23Rik	0.31	0.21	0.14	0.15	0.07	0.37	0.16	0.33
ENSMUSG00000101574	1700112H15Rik	0	0	0.2	0	0.07	0	0.15	0
ENSMUSG00000086632	1700112J05Rik	0.07	0.19	0	0	0	0	0.07	0
ENSMUSG00000097527	1700112J16Rik	0.02	0.16	0.27	0	0.09	0.09	0.07	0
ENSMUSG00000087510	1700112K13Rik	0	0	0	0	0	0	0	0
ENSMUSG00000110577	1700112L15Rik	0	0	0	0	0	0	0	0
ENSMUSG00000113358	1700112M02Rik	0	0	0	0	0	0	0	0
ENSMUSG00000096935	1700113A16Rik	0.36	0.59	0.24	0.1	0.44	0.3	0.42	0.22
ENSMUSG00000112028	1700113B09Rik	0	0	0	0	0	0	0	0
ENSMUSG00000102822	1700113B19Rik	0	0	0	0	0	0.13	0	0
ENSMUSG00000047129	1700113H08Rik	0	0	0	0	0	0	0	0
ENSMUSG00000092276	1700116B05Rik	0	0	0	0	0	0	0	0
ENSMUSG00000117497	1700116H05Rik	0	0	0	0	0	0	0	0
ENSMUSG00000100593	1700119H24Rik	0	0	0	0	0	0	0	0.1
ENSMUSG00000082488	1700119I11Rik	0	0	0	0	0	0	0	0
ENSMUSG00000045391	1700120B22Rik	0	0	0	0	0	0	0	0
ENSMUSG00000100599	1700120C14Rik	0	0.1	0	0.08	0.14	0.14	0.21	0.03
ENSMUSG00000098086	1700120C18Rik	0	0	0	0	0	0	0	0
ENSMUSG00000086333	1700120E14Rik	0	0	0	0	0	0	0	0
ENSMUSG00000100717	1700120G07Rik	0	0	0.11	0.12	0.06	0	0	0
ENSMUSG00000086068	1700120G11Rik	0	0	0	0	0.11	0	0	0
ENSMUSG00000099579	1700120K04Rik	0	0	0	0	0	0	0	0
ENSMUSG00000093386	1700120O09Rik	0	0	0	0	0	0	0	0
ENSMUSG00000086275	1700121C08Rik	0	0.29	0.38	0.24	0.32	0.16	0	0
ENSMUSG00000099574	1700121L03Rik	0	0	0	0	0	0	0	0
ENSMUSG00000100364	1700121L16Rik	0	0	0	0	0	0	0	0
ENSMUSG00000092066	1700121N20Rik	0	0.05	0	0	0	0	0	0
ENSMUSG00000117800	1700122C19Rik	0	0	0	0	0	0	0	0
ENSMUSG00000101409	1700122D07Rik	0	0	0.12	0	0	0	0	0
ENSMUSG00000087685	1700122E12Rik	0.16	0.28	0.22	0	0	0	0	0
ENSMUSG00000099735	1700122H20Rik	0	0	0	0	0	0	0	0
ENSMUSG00000094928	1700122O11Rik	0	0	0	0	0	0	0	0
ENSMUSG00000108676	1700123J17Rik	0	0	0	0	0	0	0.03	0
ENSMUSG00000029526	1700123K08Rik	0	0	0	0	0	0.03	0	0.06
ENSMUSG00000072878	1700123L14Rik	0.07	0.06	0.06	0.03	0.03	0.06	0	0
ENSMUSG00000085614	1700123M08Rik	0.72	0.39	1.16	0.78	0.85	0.9	1.15	1.08
ENSMUSG00000086080	1700123O12Rik	0	0	0	0	0.03	0	0	0
ENSMUSG00000040822	1700123O20Rik	17.23	16.29	14.52	16.19	16.69	15.44	14.41	15.37
ENSMUSG00000101481	1700123O21Rik	0	0	0	0	0.08	0	0	0
ENSMUSG00000099354	1700124L16Rik	0.1	0.13	0.19	0	0.29	0.15	0.05	0
ENSMUSG00000110938	1700124M09Rik	0	0	0	0	0	0	0	0
ENSMUSG00000085263	1700125G02Rik	0	0	0	0	0	0	0	0
ENSMUSG00000097584	1700125G22Rik	0.07	0	0	0	0	0	0	0
ENSMUSG00000085197	1700125H03Rik	6.09	6.34	2.98	3.75	5.12	6.81	1.55	2.18
ENSMUSG00000018479	1700125H20Rik	0	0	0	0	0	0	0	0.06
ENSMUSG00000099945	1700126A01Rik	0	0	0	0	0	0	0	0
ENSMUSG00000107802	1700126G02Rik	1.41	0.21	0.43	0.75	0.66	0.75	2.48	2.44
ENSMUSG00000107014	1700126H18Rik	0	0	0	0	0	0	0	0
ENSMUSG00000113830	1700127F24Rik	0	0	0.09	0	0	0	0.1	0.1
ENSMUSG00000099794	1700128A07Rik	0.24	0.1	0	0	0	0	0	0
ENSMUSG00000031510	1700128E19Rik	0	0	0.02	0	0	0	0	0
ENSMUSG00000031998	1700128F08Rik	0	0	0	0	0	0	0.04	0
ENSMUSG00000114991	1700128I11Rik	0	0	0	0	0	0	0	0
ENSMUSG00000021977	1700129C05Rik	0.05	0	0	0	0.23	0	0	0
ENSMUSG00000100603	1700129L04Rik	0	0	0	0.04	0	0	0	0
ENSMUSG00000100182	1810006J02Rik	0	0	0	0	0	0	0	0
ENSMUSG00000100844	1810007C17Rik	0	0	0	0	0	0	0	0
ENSMUSG00000100001	1810007D17Rik	0	0	0	0	0	0	0	0
ENSMUSG00000089745	1810008B01Rik	0.21	0.06	0	0.07	0	0.13	0.42	0.07
ENSMUSG00000100094	1810008I18Rik	0.02	0	0.04	0	0	0	0	0
ENSMUSG00000071653	1810009A15Rik	5.75	6.23	5.22	5.13	6.42	5.72	5.38	5.22
ENSMUSG00000094808	1810009J06Rik	0	0	0	0	0	0	0	0
ENSMUSG00000109305	1810010D01Rik	0.27	0.31	0.41	0.26	0.17	0.3	0.09	0.37
ENSMUSG00000078607	1810010H24Rik	1.38	2.45	1.64	1.33	1.56	1.09	0.58	0.8
ENSMUSG00000056329	1810010K12Rik	0	0	0	0	0	0	0	0
ENSMUSG00000087595	1810012K08Rik	2.97	3.03	2.08	3.04	2.8	2.35	2.73	2.77
ENSMUSG00000099825	1810012K16Rik	0.73	0.18	1.05	0	0.1	0	0.42	0
ENSMUSG00000028177	1810013D15Rik	0	0	0	0	0	0	0	0
ENSMUSG00000022507	1810013L24Rik	17.42	17.53	18.3	20.55	14.95	14.56	15.6	14.37
ENSMUSG00000097412	1810014B01Rik	0.39	0.6	0.57	0.66	0.63	0.57	0.81	0.56
ENSMUSG00000117434	1810014P07Rik	0	0	0	0	0.03	0	0	0.03
ENSMUSG00000106838	1810017P11Rik	0	0	0	0	0	0	0.1	0
ENSMUSG00000101088	1810018F18Rik	0	0	0	0	0	0	0	0
ENSMUSG00000086390	1810019D21Rik	0.26	0.19	0	0.28	0.03	0	0	0.04
ENSMUSG00000097115	1810019N24Rik	0.04	0.26	0.27	0.07	0.14	0.03	0.15	0.15
ENSMUSG00000089997	1810020O05Rik	0.05	0	0	0	0	0	0	0
ENSMUSG00000087331	1810021B22Rik	1.71	1	2.26	0.85	1.26	1.39	0.65	1.84
ENSMUSG00000078784	1810022K09Rik	5.39	5.96	5.76	5.38	6.97	5.64	5.82	6.05
ENSMUSG00000044145	1810024B03Rik	0.19	0.15	0.25	0.12	0.24	0.23	0.28	0.18
ENSMUSG00000101970	1810026B05Rik	0.88	1.19	1.19	1.26	0.9	1.15	1.67	1.31
ENSMUSG00000114985	1810028F09Rik	0	0	0	0.04	0	0	0	0
ENSMUSG00000044148	1810030O07Rik	17.09	18.65	17.4	18.11	18.63	16.49	17.05	17.37
ENSMUSG00000020812	1810032O08Rik	3.5	3.44	2.72	3.57	3.28	3.6	3.9	3.37
ENSMUSG00000097101	1810034E14Rik	1.47	1.02	1.23	1	1	1.08	1.06	1.02
ENSMUSG00000054091	1810037I17Rik	20.99	15.82	20.9	20.86	21.19	16.25	15.14	16.91
ENSMUSG00000102112	1810041H14Rik	0	0.06	0	0	0.13	0	0.34	0.07
ENSMUSG00000020284	1810043G02Rik	1.78	1.22	1.54	1.56	2.38	1.32	1.7	1.87
ENSMUSG00000100680	1810044D09Rik	1.76	0.61	0.64	0.56	0.33	1.67	0.36	0.61
ENSMUSG00000116846	1810044K17Rik	0	0	0	0	0	0	0	0
ENSMUSG00000036027	1810046K07Rik	0.08	0.03	0	0	0	0	0	0
ENSMUSG00000108587	1810049I09Rik	0	0	0	0	0	0	0	0
ENSMUSG00000097221	1810049J17Rik	0.37	0.75	0.11	1.42	0.46	0.35	0.25	1.15
ENSMUSG00000100277	1810053B23Rik	0	0	0	0	0	0	0	0
ENSMUSG00000035372	1810055G02Rik	20.06	19.14	21.06	21	20.14	20.61	14.99	19.09
ENSMUSG00000073155	1810058I24Rik	22.88	21.77	19.68	17.97	24.93	22.47	16.11	17.64
ENSMUSG00000086340	1810059C17Rik	0.23	0	0	0	0	0.33	0.12	0.12
ENSMUSG00000108207	1810059H22Rik	0.08	0.12	0.21	0.13	0.19	0.23	0.37	0.19
ENSMUSG00000027713	1810062G17Rik	0.06	0.44	0.63	0.9	0.24	0.36	0.76	0.39
ENSMUSG00000084925	1810062O18Rik	0.38	0.38	0.14	0.9	0.24	0.48	0.45	0.52
ENSMUSG00000085551	1810063I02Rik	0.21	0	0	0	0	0	0	0
ENSMUSG00000090925	1810064F22Rik	0	0	0	0	0	0	0	0.02
ENSMUSG00000013653	1810065E05Rik	0	0	0	0	0	0.12	0	0
ENSMUSG00000117442	1810073O08Rik	0.06	0.03	0	0	0.06	0.06	0.06	0.19
ENSMUSG00000087165	2010001A14Rik	0.8	2.51	1.68	1.37	0.83	1.44	1.22	1.07
ENSMUSG00000051606	2010001K21Rik	0	0	0	0.02	0	0	0.02	0
ENSMUSG00000111296	2010001M07Rik	0	0	0	0	0	0	0	0
ENSMUSG00000042041	2010003K11Rik	0	0	0	0	0	0	0	0
ENSMUSG00000044694	2010007H06Rik	0.36	0.13	0.23	0.11	0.24	0.21	0.27	0.25
ENSMUSG00000107761	2010008C14Rik	0	0	0	0.09	0	0	0	0
ENSMUSG00000100860	2010009K17Rik	0	0	0.09	0	0	0.1	0	0
ENSMUSG00000102047	2010010A06Rik	0	0	0	0	0	0	0	0
ENSMUSG00000087277	2010013B24Rik	0	0.07	0	0	0	0	0	0
ENSMUSG00000096983	2010015M23Rik	0	0	0	0	0.04	0	0	0
ENSMUSG00000091575	2010016I18Rik	0.02	0.04	0	0.04	0	0	0.02	0.1
ENSMUSG00000104368	2010103J01Rik	0.59	0.38	0	0.7	0	0.84	0.45	0.3
ENSMUSG00000100738	2010106C02Rik	0	0	0.16	0	0	0	0	0
ENSMUSG00000025528	2010106E10Rik	0	0	0	0	0	0	0	0
ENSMUSG00000117376	2010106G04Rik	0	0	0	0	0	0	0	0
ENSMUSG00000029384	2010109A12Rik	0	0	0	0.09	0	0.17	0.05	0
ENSMUSG00000107558	2010109P13Rik	0	0	0	0.14	0	0	0	0
ENSMUSG00000098434	2010110E17Rik	0	0.28	0	0	0	0	0.07	0.2
ENSMUSG00000106095	2010110G14Rik	0	0	0	0	0	0	0	0
ENSMUSG00000097755	2010110K18Rik	0.08	0.12	0.16	0.08	0.06	0.08	0.08	0.02
ENSMUSG00000114604	2010203P06Rik	0	0	0	0	0	0	0	0
ENSMUSG00000063018	2010204K13Rik	0.83	0.88	0.79	0.83	1.12	1.13	0.66	1.27
ENSMUSG00000026090	2010300C02Rik	0.06	0.01	0.03	0.04	0.03	0.01	0.03	0.08
ENSMUSG00000097289	2010300F17Rik	0.6	0.32	0.24	0.29	0.25	0.19	0.27	0.44
ENSMUSG00000100714	2010308F09Rik	0	0	0	0	0.08	0.15	0.08	0
ENSMUSG00000106567	2010309G21Rik	0	0	0	0	0	0	0	0
ENSMUSG00000101268	2010310C07Rik	0	0.04	0	0.02	0	0	0.1	0.12
ENSMUSG00000074829	2010315B03Rik	0	0	0	0	0	0	0	0.02
ENSMUSG00000100691	2010320M18Rik	0	0	0	0	0	0	0	0
ENSMUSG00000089983	2010320O07Rik	0	0	0	0	0	0	0.29	0
ENSMUSG00000108479	2200002A13Rik	0	0	0	0	0	0	0	0
ENSMUSG00000030587	2200002D01Rik	1.13	0.95	0.2	1.22	0.45	0.86	0.59	0.79
ENSMUSG00000013083	2200002J24Rik	0	0	0	0	0	0	0	0
ENSMUSG00000108787	2200007N16Rik	0	0	0	0	0	0	0	0
ENSMUSG00000097165	2210008F06Rik	0.21	0.28	0.1	0.05	0.2	0	0	0.16
ENSMUSG00000116929	2210009P08Rik	0	0	0	0	0	0	0.12	0
ENSMUSG00000029882	2210010C04Rik	0	0.09	0	0	0	0.05	0	0
ENSMUSG00000074217	2210011C24Rik	0.04	0.11	0.07	0.04	0.23	0.23	0.04	0.04
ENSMUSG00000101791	2210011K15Rik	0.16	0.06	0.15	0.06	0.06	0.09	0.07	0.03
ENSMUSG00000021550	2210016F16Rik	10.65	10.28	10.04	9.55	11.2	9.9	11.89	11.62
ENSMUSG00000029559	2210016L21Rik	10.61	9.68	9.69	8.13	9.34	8.83	9.67	10.43
ENSMUSG00000103523	2210017I01Rik	0	0	0	0	0	0	0	0
ENSMUSG00000116714	2210020O09Rik	0	0	0	0	0	0	0	0
ENSMUSG00000113800	2210039B01Rik	0	0	0	0.05	0	0	0.06	0
ENSMUSG00000114772	2210404E10Rik	0	0	0	0	0	0	0	0
ENSMUSG00000109036	2210406H18Rik	0.1	1.03	0.09	0.1	0.43	0.39	0.52	0.43
ENSMUSG00000039563	2210406O10Rik	0.12	0.1	0.15	0.13	0.09	0.04	0.05	0.05
ENSMUSG00000037145	2210407C18Rik	0	0	0.04	0.04	0	0	0	0
ENSMUSG00000087380	2210408F21Rik	0.43	0.52	0.61	0.57	0.6	0.34	0.6	1.25
ENSMUSG00000071252	2210408I21Rik	1.07	0.98	0.89	0.71	0.76	0.82	0.75	0.54
ENSMUSG00000118322	2210409D07Rik	0	0	0	0	0	0	0	0
ENSMUSG00000081766	2210409E12Rik	0	0	0	0	0.62	0	0	0
ENSMUSG00000085563	2210411M09Rik	0.18	0.08	0.65	0.42	0.08	0.42	0.45	0.27
ENSMUSG00000107216	2210412B16Rik	0.46	0.9	0.52	0.66	0.75	0.54	0.12	0.83
ENSMUSG00000085394	2210414B05Rik	0	0	0	0	0	0	0	0
ENSMUSG00000111043	2210414F02Rik	0	0	0	0	0	0	0	0
ENSMUSG00000086494	2210417A02Rik	0	0	0	0	0.19	0	0	0
ENSMUSG00000078894	2210418O10Rik	0.14	0.03	0.11	0.1	0.08	0.03	0.01	0.03
ENSMUSG00000101773	2210420H20Rik	0	0	0	0	0	0	0	0
ENSMUSG00000039269	2300002M23Rik	0	0	0	0	0	0	0	0
ENSMUSG00000078257	2300003K06Rik	0	0	0	0	0	0	0	0
ENSMUSG00000032403	2300009A05Rik	0.71	0.77	0.7	0.84	0.83	0.7	1.07	0.65
ENSMUSG00000097354	2310001H17Rik	0.2	0.17	0.19	0.1	0.18	0.26	0.34	0.31
ENSMUSG00000108514	2310001K20Rik	0	0	0	0	0	0	0	0
ENSMUSG00000053353	2310001K24Rik	0.08	0.27	0.14	0	0.14	0.07	0.23	0.08
ENSMUSG00000112701	2310002D06Rik	0	0.1	0	0	0	0	0	0
ENSMUSG00000097178	2310002F09Rik	0.03	0.03	0.05	0.01	0.01	0.01	0.01	0.04
ENSMUSG00000028396	2310002L09Rik	0.05	0	0	0	0	0.05	0	0.03
ENSMUSG00000007457	2310003L06Rik	0	0	0	0	0	0	0	0
ENSMUSG00000110916	2310003N18Rik	0	0	0	0	0	0	0	0
ENSMUSG00000087254	2310005A03Rik	0	0	0	0.04	0	0	0	0
ENSMUSG00000099446	2310005E17Rik	0	0	0	0.05	0	0	0.05	0
ENSMUSG00000100335	2310008N11Rik	0	0	0	0.06	0	0	0	0
ENSMUSG00000098332	2310009A05Rik	2.73	2.49	1.73	1.87	2.52	2.25	1.35	1.2
ENSMUSG00000079283	2310009B15Rik	4.29	2.67	2.71	2.83	3.98	3.21	3.87	3.03
ENSMUSG00000097162	2310010J17Rik	1.98	1.15	1.12	1.17	0.89	0.99	1.15	0.98
ENSMUSG00000020133	2310011J03Rik	16.45	17.64	18.42	20.42	17.93	18.05	16.06	17.86
ENSMUSG00000085945	2310014F06Rik	0.71	0.87	0.5	0.62	0.29	0.48	1.09	1.05
ENSMUSG00000097729	2310015A10Rik	1.25	1.77	1.94	1.26	1.4	1.51	1.52	1.26
ENSMUSG00000099411	2310015D24Rik	0	0	0	0	0	0	0	0.02
ENSMUSG00000101257	2310015K22Rik	0	0.14	0	0.07	0	0	0	0
ENSMUSG00000102098	2310016D03Rik	0	0	0	0	0	0	0	0
ENSMUSG00000085965	2310016D23Rik	0	0	0	0	0	0	0	0
ENSMUSG00000070574	2310016G11Rik	0	0	0	0	0	0	0	0
ENSMUSG00000100410	2310020H05Rik	0	0	0	0.08	0	0	0.16	0
ENSMUSG00000049643	2310022A10Rik	3.4	3.2	3.44	3.02	2.89	2.92	3.19	3.13
ENSMUSG00000031983	2310022B05Rik	126.7	126.03	104.26	108.91	109.6	111.5	111.45	110.42
ENSMUSG00000097710	2310026I22Rik	0	0	0	0	0	0	0	0
ENSMUSG00000078519	2310026L22Rik	0.28	1.12	0.26	0.27	0.13	0.54	1.3	0.44
ENSMUSG00000099447	2310030A07Rik	0	0.08	0	0	0	0.09	0	0
ENSMUSG00000032062	2310030G06Rik	0.23	0.15	0.18	0.22	0.32	0.19	0.35	0.09
ENSMUSG00000097457	2310031A07Rik	0.17	0.4	0.16	0.28	0.49	0.16	0.7	0.3
ENSMUSG00000020441	2310033P09Rik	7.04	6.89	6.36	6.49	5.75	6.73	6	5.82
ENSMUSG00000068078	2310034C09Rik	0	0	0	0	0	0	0	0
ENSMUSG00000099655	2310034G01Rik	0.25	0.58	0.34	0.2	0.16	0.67	0	0.3
ENSMUSG00000100157	2310034O05Rik	0	0	0	0	0	0	0	0.05
ENSMUSG00000062619	2310039H08Rik	10.6	11.36	10.1	8.87	11.74	10.35	8.14	7.88
ENSMUSG00000100550	2310039L15Rik	0	0.04	0	0	0	0	0	0
ENSMUSG00000072852	2310040G07Rik	0.72	0.38	0.07	0.07	0.41	0.27	0.51	0.07
ENSMUSG00000101655	2310040G24Rik	0.07	0.13	0.4	0.49	0.62	0.28	0.15	0.15
ENSMUSG00000101746	2310043L19Rik	0.08	0	0	0	0	0	0	0
ENSMUSG00000097768	2310043M15Rik	0.29	0.41	0.49	0.38	0.47	0.34	0.55	0.26
ENSMUSG00000102106	2310043O21Rik	0	0	0	0	0	0	0	0
ENSMUSG00000108732	2310043P16Rik	1.83	2.68	0.88	0.93	1.42	1.28	8.62	6.33
ENSMUSG00000085080	2310044K18Rik	0	0	0.08	0	0.09	0.35	0.09	0.38
ENSMUSG00000102308	2310046K23Rik	0	0	0	0	0	0.08	0	0.35
ENSMUSG00000100783	2310047D07Rik	0	0.06	0.13	0	0	0	0.07	0.07
ENSMUSG00000090314	2310050C09Rik	0	0	0	0	0	0	0.11	0
ENSMUSG00000015519	2310057J18Rik	0	0	0	0	0	0	0	0
ENSMUSG00000040177	2310057M21Rik	0.95	1	1.07	1.11	1	1.01	0.71	0.98
ENSMUSG00000048830	2310057N15Rik	0	0	0	0	0	0	0	0
ENSMUSG00000085379	2310058D17Rik	0.28	0.2	0.11	0.15	0.28	0.35	0.2	0.42
ENSMUSG00000050705	2310061I04Rik	4.55	5.4	4.14	3.79	4.04	4.41	4.63	3.71
ENSMUSG00000050704	2310061N02Rik	0	0	0	0	0	0	0	0
ENSMUSG00000087410	2310065F04Rik	0	0	0	0.02	0	0	0	0
ENSMUSG00000114372	2310067P03Rik	0	0	0	0	0	0	0	0
ENSMUSG00000100084	2310068J16Rik	0.3	0.31	0.32	0.39	0.66	0.33	0.77	0.31
ENSMUSG00000100291	2310069B03Rik	0	0	0	0	0	0	0	0
ENSMUSG00000105858	2310074N15Rik	0	0	0.27	0.47	0.37	0.84	0	0.2
ENSMUSG00000089718	2310075C17Rik	0	0	0	0	0	0	0	0
ENSMUSG00000045331	2310079G19Rik	0	0	0	0	0	0	0	0
ENSMUSG00000085020	2310081O03Rik	0	0.07	0	0	0	0	0.08	0
ENSMUSG00000106223	2400006E01Rik	0	0	0	0	0	0	0	0
ENSMUSG00000045411	2410002F23Rik	11.29	12.48	12.42	12.86	12.38	12.69	11.55	10.93
ENSMUSG00000116947	2410003I16Rik	0	0	0	0	0	0	0	0
ENSMUSG00000085860	2410003L11Rik	0	0	0.09	0	0.09	0.14	0	0
ENSMUSG00000036873	2410004B18Rik	8.83	8.16	9.69	8.86	10.53	8.15	8.8	7.66
ENSMUSG00000085338	2410004I01Rik	0	0	0.22	0	0	0	0	0
ENSMUSG00000071398	2410004P03Rik	0.03	0.08	0.09	0.14	0.02	0.05	0.03	0
ENSMUSG00000086841	2410006H16Rik	300.91	273.84	255.49	224.08	313.78	269.27	218.38	317.56
ENSMUSG00000099528	2410012E07Rik	0	0	0	0	0	0	0	0
ENSMUSG00000038311	2410017I17Rik	0	0	0	0	0	0	0.02	0
ENSMUSG00000073164	2410018L13Rik	1.21	1.18	0.73	0.85	1.34	0.94	1.55	1.01
ENSMUSG00000100572	2410021H03Rik	2.01	1.82	1.16	1.14	1.75	1.98	2.65	1.54
ENSMUSG00000100017	2410022M11Rik	1.7	2.68	1.66	1.2	1.6	1.75	1.39	1.23
ENSMUSG00000054379	2410024N13Rik	0	0	0	0	0	0	0	0
ENSMUSG00000044387	2410080I02Rik	0.27	0	0.63	0	0.13	0.26	0.28	0
ENSMUSG00000051297	2410124H12Rik	0	0	0	0	0	0	0	0
ENSMUSG00000032840	2410131K14Rik	8.93	9.16	8.42	9.09	8.65	8.19	7.24	6.7
ENSMUSG00000064308	2410137M14Rik	0	0.11	0.06	0	0	0.06	0.07	0.07
ENSMUSG00000074832	2410141K09Rik	0	0	0	0	0	0	0	0
ENSMUSG00000084825	2410152P15Rik	0	0	0	0	0	0	0	0
ENSMUSG00000096917	2500002B13Rik	0.21	0.24	0.17	0.16	0.24	0.16	0.11	0.28
ENSMUSG00000073236	2500004C02Rik	1.4	0.88	0.53	0.63	1.02	0.48	1.05	0.82
ENSMUSG00000071632	2510002D24Rik	3.25	4.12	4.62	4.4	3.93	3.05	2.89	4.88
ENSMUSG00000043391	2510009E07Rik	6.73	6.1	5.2	7.02	5.68	5.46	5.23	4.65
ENSMUSG00000106825	2510016D11Rik	0.12	0.56	0.37	0.44	0.33	0.49	0.82	0.36
ENSMUSG00000104891	2510017J16Rik	0.45	0.08	0	0.22	0.08	0.21	0.23	0.42
ENSMUSG00000044496	2510039O18Rik	20.1	22.74	23.79	26.06	24.41	26.39	23.68	22.56
ENSMUSG00000066175	2510046G10Rik	0.43	0.09	0	0.31	0.25	0.36	0.11	0.45
ENSMUSG00000116797	2600002D14Rik	0	0	0	0	0	0.37	0.4	0
ENSMUSG00000039798	2600006K01Rik	0.73	0.42	0.52	0.19	0.61	0.54	0.25	0.38
ENSMUSG00000100303	2600014E21Rik	0.07	0.1	0.03	0.04	0.12	0.12	0.07	0.07
ENSMUSG00000103828	2610001A08Rik	0	0	0	0	0.06	0	0	0
ENSMUSG00000052419	2610001J05Rik	7.89	7.75	6.94	7.27	8.34	7.78	5.96	7.32
ENSMUSG00000031242	2610002M06Rik	5.3	4.62	5.43	4.7	4.13	4.53	7.36	6.36
ENSMUSG00000071793	2610005L07Rik	3.99	4.42	3.64	4.11	3.36	3.31	3.16	2.93
ENSMUSG00000060301	2610008E11Rik	5.3	6.45	5.47	5.06	5.91	5.66	5.52	3.93
ENSMUSG00000104936	2610011E03Rik	0	0	0	0	0	0	0	0
ENSMUSG00000102474	2610012C04Rik	0	0	0	0.05	0	0	0.06	0
ENSMUSG00000101089	2610016A17Rik	0.67	0.05	0.28	0.25	0.24	0.69	0.37	0.7
ENSMUSG00000107909	2610017A05Rik	0.03	0.18	0.09	0.1	0	0.23	0.1	0
ENSMUSG00000097537	2610020C07Rik	0.38	0.38	0.39	0.62	0.22	0.51	0.26	0.2
ENSMUSG00000097332	2610020F03Rik	0	0	0	0	0	0	0	0
ENSMUSG00000091474	2610021A01Rik	2.34	2.25	1.82	2.46	2.25	2.05	2.39	1.99
ENSMUSG00000084362	2610024D14Rik	0	0.34	0	0.19	0	0	0	0
ENSMUSG00000099957	2610027F03Rik	0	0.22	0.23	0.1	0.05	0.05	0.15	0.05
ENSMUSG00000087013	2610027K06Rik	0.18	0.33	0.24	0	0.04	0.06	0.23	0.14
ENSMUSG00000110997	2610028D06Rik	0.27	0.38	0.09	0.54	0.09	0.6	0.3	0.38
ENSMUSG00000085562	2610028E06Rik	0.28	0.13	0.29	0.18	0.23	0.11	0.09	0.11
ENSMUSG00000009114	2610028H24Rik	0	0	0	0.03	0.06	0.06	0	0
ENSMUSG00000104429	2610034O05Rik	0	0	0	0	0	0	0	0
ENSMUSG00000087259	2610035D17Rik	2.84	3.42	2.65	3.24	2.47	2.57	3.83	3.55
ENSMUSG00000085555	2610035F20Rik	0.05	0	0	0.02	0.05	0	0	0
ENSMUSG00000097536	2610037D02Rik	0.45	0.68	0.46	0.65	0.64	0.59	0.72	0.72
ENSMUSG00000079388	2610042L04Rik	0	0.05	0	0	0	0.03	0	0
ENSMUSG00000071302	2610044O15Rik8	3.01	3.41	3.65	3.02	3.4	3.26	2.34	2.4
ENSMUSG00000103259	2610105M22Rik	0	0	0	0	0	0	0	0
ENSMUSG00000079671	2610203C22Rik	0.03	0.08	0.03	0.06	0.04	0.03	0.07	0.2
ENSMUSG00000084860	2610204G07Rik	0.17	0.05	0.1	0.22	0.16	0	0.18	0.18
ENSMUSG00000085236	2610206C17Rik	0	0	0.05	0	0.06	0	0.06	0
ENSMUSG00000103531	2610300A13Rik	0	0	0	0	0	0	0	0
ENSMUSG00000107479	2610300M13Rik	0.14	0.1	0.18	0	0.13	0.08	0	0
ENSMUSG00000059482	2610301B20Rik	8.97	8.88	10.42	7.93	10.19	8.13	8.22	7.29
ENSMUSG00000046995	2610303G11Rik	0	0	0	0	0	0	0	0
ENSMUSG00000100164	2610306M01Rik	2.78	2.77	1.4	1.41	2.06	3.37	1.72	2.43
ENSMUSG00000108614	2610306O10Rik	1.77	0.98	0.85	1.96	1.49	1.59	1.7	2.02
ENSMUSG00000085936	2610307P16Rik	0.31	0.6	0.43	0.38	0.37	0.64	0.79	0.68
ENSMUSG00000097040	2610316D01Rik	0.38	0.16	0.26	0.5	0.31	0.04	0.14	0.1
ENSMUSG00000114532	2610318M16Rik	0	0.09	0	0	0	0	0	0
ENSMUSG00000049916	2610318N02Rik	0.12	0.15	0.05	0.26	0.19	0.17	0.23	0.03
ENSMUSG00000010277	2610507B11Rik	26.68	26.02	27.54	26.59	25.58	26.2	41.11	38.81
ENSMUSG00000085882	2610507I01Rik	3.76	3.4	2.37	2.36	2.13	1.71	3.2	2.6
ENSMUSG00000103968	2610509F24Rik	0	0	0.06	0	0	0	0	0
ENSMUSG00000096001	2610528A11Rik	0	0.18	0	0.07	0.06	0	0.21	0
ENSMUSG00000028536	2610528J11Rik	0.05	0	0.09	0	0	0	0	0
ENSMUSG00000097334	2700012I20Rik	0.75	0.15	0	0.08	0.47	0.16	0.93	0.26
ENSMUSG00000097731	2700016F22Rik	0.03	0	0	0	0	0.01	0.02	0.02
ENSMUSG00000106691	2700029L08Rik	0.12	0.2	0.21	0.67	0.4	0.11	0.28	0.4
ENSMUSG00000086328	2700033N17Rik	3.16	2.76	3.17	3.02	2.08	2.7	2.49	3.59
ENSMUSG00000097180	2700038G22Rik	0.61	0.41	1.08	1.26	0.94	1.08	0.76	1
ENSMUSG00000041789	2700046A07Rik	0	0	0	0	0	0	0	0
ENSMUSG00000097787	2700046G09Rik	0.59	0.33	0.85	0.79	0.98	0.85	0.84	0.36
ENSMUSG00000034601	2700049A03Rik	1.75	1.83	1.7	2.04	1.92	2.22	1.73	2.04
ENSMUSG00000117042	2700054A10Rik	0.11	0.15	0.12	0.15	0.04	0.05	0.17	0.19
ENSMUSG00000024273	2700062C07Rik	4.85	5.42	5.09	5.81	5.28	5.48	5.24	5.37
ENSMUSG00000086172	2700068H02Rik	0.03	0.03	0	0	0	0.06	0	0
ENSMUSG00000086224	2700069I18Rik	1.6	2.1	0.41	1.58	1.51	1.47	1.43	1.14
ENSMUSG00000103722	2700078F05Rik	0	0.02	0	0	0.02	0.07	0	0.04
ENSMUSG00000108671	2700080J24Rik	0.14	0.03	0.34	0.07	0.23	0.07	0	0.07
ENSMUSG00000053080	2700081O15Rik	13.96	15.81	14.78	16.38	13.04	14.12	13.47	13.02
ENSMUSG00000100119	2700089I24Rik	0	0	0.09	0.03	0	0	0	0
ENSMUSG00000062198	2700097O09Rik	0.74	1.3	0.79	0.99	1.08	0.96	0.96	1
ENSMUSG00000098090	2700099C18Rik	2.57	2.38	1.95	1.37	1.42	1.13	2.2	1.51
ENSMUSG00000087497	2810001G20Rik	3.5	3.95	2.46	2.17	3.19	1.89	3.13	2.67
ENSMUSG00000045464	2810002D19Rik	2.09	2.02	1.81	1.28	2.65	1.8	2.16	2.34
ENSMUSG00000031984	2810004N23Rik	6.38	6.14	5.98	5.25	6.58	5.59	4.7	4.95
ENSMUSG00000047635	2810006K23Rik	2.73	3.03	2.82	2.45	2.4	2.63	2.34	3.05
ENSMUSG00000099881	2810013P06Rik	2.42	2.4	2.97	2.88	1.95	2.88	2.79	2.59
ENSMUSG00000020491	2810021J22Rik	3.4	2.24	2.04	2.52	1.79	2.81	1.79	2.61
ENSMUSG00000049881	2810025M15Rik	5.97	7.44	4.28	5.76	6.46	5.86	3.99	5.14
ENSMUSG00000096995	2810029C07Rik	0.29	0.31	0.29	0.28	0.19	0.14	0.15	0.39
ENSMUSG00000099338	2810030D12Rik	0	0	0	0	0	0	0.04	0
ENSMUSG00000037735	2810032G03Rik	1.86	1.72	1.8	1.44	1.37	1.6	1.15	0.95
ENSMUSG00000099034	2810039B14Rik	0.5	0.24	0.42	0.26	0.21	0.49	0.32	0.28
ENSMUSG00000092574	2810047C21Rik1	0	0.04	0.18	0	0.14	0.27	0.39	0.15
ENSMUSG00000100891	2810049E08Rik	0	0	0	0	0	0	0	0
ENSMUSG00000099966	2810402E24Rik	1.52	1.46	1.13	1.2	1.67	1.63	1.11	1.2
ENSMUSG00000086629	2810403D21Rik	0.19	0.2	0.23	0.23	0.19	0.25	0.25	0.25
ENSMUSG00000114656	2810403G07Rik	0	0	0.13	0.03	0.07	0	0.11	0
ENSMUSG00000085329	2810404F17Rik	0	0	0	0	0	0	0	0
ENSMUSG00000102046	2810404M03Rik	0.32	0.04	0.21	0	0.26	0.09	0.09	0
ENSMUSG00000103562	2810405F15Rik	0.06	0	0	0	0	0.06	0	0
ENSMUSG00000101493	2810405F17Rik	0.31	0.49	1.07	0.93	1.01	1.02	0.52	0.79
ENSMUSG00000055972	2810407A14Rik	0	0.03	0.04	0.06	0.06	0.01	0.11	0
ENSMUSG00000018570	2810408A11Rik	0.74	1.24	1.21	0.81	1.47	1.25	0.51	0.85
ENSMUSG00000087213	2810408I11Rik	0.7	0.23	0.33	0.19	0.46	0.42	0.3	0.45
ENSMUSG00000075389	2810410L24Rik	1.07	0.95	0.96	0.79	0.64	1.05	0.46	0.64
ENSMUSG00000100594	2810414N06Rik	0.7	0.97	0.83	0.63	0.74	1.13	0.88	1.19
ENSMUSG00000097811	2810425M01Rik	0.06	0.11	0	0.06	0	0	0.03	0.1
ENSMUSG00000105981	2810428J06Rik	0.13	0.07	0.21	0.16	0.2	0.14	0.21	0.13
ENSMUSG00000097709	2810429I04Rik	0.01	0.01	0.02	0	0.03	0.01	0.01	0.02
ENSMUSG00000085766	2810430I11Rik	1.68	2.23	1.54	2.17	1.54	1.83	1.65	2.29
ENSMUSG00000104987	2810432F15Rik	0	0	0	0	0	0	0	0
ENSMUSG00000086283	2810433D01Rik	3.4	2.06	1.73	1.72	1.64	2.87	0.72	1.32
ENSMUSG00000090260	2810442N19Rik	0.74	1.82	0.73	0.88	0.75	0.81	0.69	0.19
ENSMUSG00000100876	2810454H06Rik	0.38	0.21	0.15	0.16	0.14	0.22	0.24	0.04
ENSMUSG00000085030	2810455O05Rik	0.37	1	0.62	0.55	0.25	0.64	0.82	0.31
ENSMUSG00000115410	2810457G06Rik	0.79	0.62	0.42	0.52	0.24	0.79	0.42	0.43
ENSMUSG00000026227	2810459M11Rik	0.02	0	0.03	0.02	0.02	0.03	0	0
ENSMUSG00000091475	2810468N07Rik	0.32	0.3	0.24	0.18	0.35	0.2	0.14	0.25
ENSMUSG00000084966	2810471M01Rik	0	0	0	0	0	0	0.04	0.04
ENSMUSG00000103004	2900002M20Rik	0	0	0	0	0	0	0	0
ENSMUSG00000043833	2900005J15Rik	0.35	0.31	0.27	0.32	0.38	0.54	0.24	0.66
ENSMUSG00000102014	2900009J06Rik	0.45	0.3	0.21	0.22	0	0	0	0
ENSMUSG00000044117	2900011O08Rik	0	0	0	0.02	0.04	0.05	0.1	0.05
ENSMUSG00000104244	2900018N21Rik	0.83	0.6	0.53	0.14	0.31	0.65	0.62	0.6
ENSMUSG00000102386	2900022M07Rik	0	0.05	0	0	0	0	0	0
ENSMUSG00000113932	2900024D18Rik	0	0	0	0	0	0	0	0
ENSMUSG00000051339	2900026A02Rik	4.62	4.87	4.06	3.76	3.59	3.8	3.68	3.54
ENSMUSG00000109162	2900027M19Rik	0	0	0	0	0.04	0	0	0
ENSMUSG00000103776	2900035J10Rik	0	0	0	0	0.2	0	0	0
ENSMUSG00000103663	2900037B21Rik	0	0	0	0	0	0	0	0
ENSMUSG00000115625	2900040C04Rik	0	0	0	0	0	0	0	0
ENSMUSG00000054418	2900041M22Rik	0.38	0.36	0.41	0.06	0.42	0.55	0.19	0.59
ENSMUSG00000114195	2900042G08Rik	0	0	0	0	0	0	0	0
ENSMUSG00000103669	2900042K21Rik	0	0	0	0	0	0	0.27	0
ENSMUSG00000111938	2900045O20Rik	0	0	0.04	0	0.08	0	0	0
ENSMUSG00000043993	2900052L18Rik	0.68	0.88	0.92	0.82	1.08	0.65	1.09	1.04
ENSMUSG00000099696	2900052N01Rik	0	0	0	0	0	0	0	0
ENSMUSG00000117797	2900057B20Rik	0	0	0	0.11	0	0	0	0.06
ENSMUSG00000107722	2900060B14Rik	0	0	0	0	0	0	0	0.38
ENSMUSG00000113621	2900060N12Rik	0	0.01	0.03	0	0.08	0.01	0.01	0
ENSMUSG00000106746	2900064F13Rik	0	0	0.1	0	0	0	0.06	0
ENSMUSG00000105771	2900064K03Rik	0	0	0	0	0	0	0	0.02
ENSMUSG00000102276	2900069G24Rik	0	0	0	0	0	0	0	0
ENSMUSG00000087018	2900072N19Rik	0	0.25	0.26	0.14	0.33	0.07	0	0
ENSMUSG00000097277	2900076A07Rik	2.2	2.12	2.24	1.94	2.45	2.36	2.76	2.98
ENSMUSG00000107015	2900076G11Rik	0	0	0	0	0	0.17	0	0
ENSMUSG00000111358	2900078I11Rik	0.28	0.75	0.05	0	0.48	0.16	0.23	0.29
ENSMUSG00000087038	2900079G21Rik	0	0	0	0	0.01	0	0	0
ENSMUSG00000087484	2900089D17Rik	2	1.67	1.67	1.67	1.49	1.82	1.17	1.94
ENSMUSG00000030385	2900092C05Rik	0	0	0	0	0	0	0	0
ENSMUSG00000104034	2900092N22Rik	0	0	0	0.04	0	0	0	0
ENSMUSG00000104419	2900092O11Rik	0	0	0	0	0	0	0	0
ENSMUSG00000099632	2900093K20Rik	0.8	0.88	1.28	1.83	1.13	1.71	0.72	0.93
ENSMUSG00000102869	2900097C17Rik	53.78	57.33	54.36	57.69	57.5	61	54.43	47.68
ENSMUSG00000070282	3000002C10Rik	0.4	0.42	0.46	0.49	0.38	0.33	0.47	0.55
ENSMUSG00000084885	3010001F23Rik	0.09	0.33	0.52	0.6	0.35	0.3	0.38	0.29
ENSMUSG00000085355	3010003L21Rik	0.52	0.8	0.36	0.34	0.77	0.49	0.4	0.64
ENSMUSG00000086254	3100003L05Rik	0	0	0	0	0	0	0	0
ENSMUSG00000079737	3110001I22Rik	2.07	1.81	1.19	0.93	1.16	1.33	1.22	1.07
ENSMUSG00000085588	3110004A20Rik	0	0	0	0	0	0	0	0
ENSMUSG00000114649	3110006O06Rik	0	0	0.06	0	0	0.01	0.17	0
ENSMUSG00000026388	3110009E18Rik	0.42	0.27	0.41	0.61	0.49	0.4	0.29	0.44
ENSMUSG00000113331	3110009F21Rik	0	0	0	0	0	0	0	0
ENSMUSG00000109163	3110009M11Rik	0	0	0.06	0	0	0	0	0
ENSMUSG00000114824	3110015C05Rik	0	0	0	0	0	0	0	0
ENSMUSG00000060375	3110018I06Rik	0	0	0	0	0	0	0	0
ENSMUSG00000094958	3110021N24Rik	0.03	0.08	0.11	0.03	0.18	0.12	0	0
ENSMUSG00000107291	3110031N09Rik	0	0	0	0	0	0	0	0
ENSMUSG00000074415	3110039I08Rik	7.48	9.12	6.81	7.04	7.02	8.18	11.94	11.86
ENSMUSG00000104861	3110039M20Rik	0	0.05	0	0	0	0	0	0.06
ENSMUSG00000114582	3110040M04Rik	0	0	0	0	0	0	0	0
ENSMUSG00000025102	3110040N11Rik	9.2	9.09	9.09	8.06	9.48	7.77	9.74	6.84
ENSMUSG00000112260	3110043J17Rik	0	0	0	0	0	0	0	0
ENSMUSG00000097503	3110045C21Rik	0.5	0.22	0.6	0.1	0.47	0.14	0.56	0.57
ENSMUSG00000085642	3110053B16Rik	0.75	0.65	0.42	0.54	0.49	0.27	1.08	0.64
ENSMUSG00000085622	3110056K07Rik	0.92	0.77	1.15	1.33	1.04	1.23	0.92	1.38
ENSMUSG00000103634	3110062G12Rik	0.44	0.07	0.22	0.08	0.11	0.23	0.16	0.29
ENSMUSG00000081187	3110067C02Rik	0.08	0.12	0.05	0.05	0.05	0.03	0.14	0.11
ENSMUSG00000074635	3110070M22Rik	0.7	0.48	0.87	0.63	1.04	1.24	0.1	0.78
ENSMUSG00000109625	3110080E11Rik	0	0	0	0.02	0	0	0	0.02
ENSMUSG00000103284	3110080O07Rik	0	0	0	0	0	0	0	0
ENSMUSG00000053553	3110082I17Rik	4.1	3.6	4.09	4.63	4.07	3.24	3.07	3.98
ENSMUSG00000086815	3110082J24Rik	0.22	0.06	0	0.14	0.42	0.14	0	0
ENSMUSG00000097303	3110083C13Rik	0	0.1	0.64	0.11	0.06	0.06	0.3	0.43
ENSMUSG00000085582	3110099E03Rik	0	0	0.05	0	0	0.02	0.02	0.18
ENSMUSG00000113434	3200001D21Rik	0	0	0.02	0	0	0	0.03	0
ENSMUSG00000073590	3222401L13Rik	0.49	0.32	0.25	0.22	0.44	0.35	0.46	0.24
ENSMUSG00000033731	3300002A11Rik	0	0	0	0	0	0.45	0.08	0
ENSMUSG00000063364	3300002I08Rik	0.94	0.73	0.37	0.75	0.63	0.23	0.63	0.47
ENSMUSG00000107585	3300002P13Rik	0	0	0	0	0	0	0	0
ENSMUSG00000096965	3300005D01Rik	5.4	4.04	5.39	4.07	6.71	4.23	5.25	5.04
ENSMUSG00000071540	3425401B19Rik	0.05	0.18	0.12	0.12	0.16	0.26	0.18	0.2
ENSMUSG00000089759	3632454L22Rik	0	0.01	0	0	0	0.01	0.06	0
ENSMUSG00000113009	3732407C23Rik	0	0	0	0	0	0	0	0
ENSMUSG00000031125	3830403N18Rik	0.17	0.24	0.1	0.16	0.1	0.37	0.17	0.12
ENSMUSG00000033111	3830406C13Rik	3.74	4.46	4.76	3.55	4.02	4.04	3.99	3.33
ENSMUSG00000071181	3830408C21Rik	0.34	0.38	0.21	0.29	0.28	0.33	0.36	0.26
ENSMUSG00000031179	3830417A13Rik	0	0	0	0	0	0.03	0	0
ENSMUSG00000106485	3830422I06Rik	0.1	0	0	0	0	0	0	0
ENSMUSG00000101731	3830432H09Rik	0	0	0	0	0.02	0	0.04	0
ENSMUSG00000038917	3930402G23Rik	0.12	0.1	0.06	0.07	0.03	0.13	0	0.07
ENSMUSG00000064202	4430402I18Rik	0.03	0.09	0.1	0.02	0.07	0.06	0.07	0.01
ENSMUSG00000075027	4631405J19Rik	0.05	0.06	0.09	0.02	0	0.12	0.1	0.12
ENSMUSG00000097850	4631405K08Rik	0	0.02	0	0	0	0	0	0
ENSMUSG00000114655	4631422I05Rik	0	0	0	0	0	0	0	0.23
ENSMUSG00000042579	4632404H12Rik	1.17	1.07	0.89	0.79	0.91	1.05	1.2	0.84
ENSMUSG00000106296	4632404M16Rik	0.08	0.02	0	0	0.04	0.06	0.14	0
ENSMUSG00000097561	4632411P08Rik	0.05	0	0.13	0	0.05	0	0.02	0
ENSMUSG00000048106	4632415L05Rik	2.85	2.94	3.2	2.95	2.62	2.57	3.19	2.53
ENSMUSG00000111605	4632418H02Rik	0.21	0.16	0.21	0.22	0.02	0.14	0.04	0.04
ENSMUSG00000074024	4632427E13Rik	0.37	0.54	0.29	0.24	0.43	0.41	0.61	0.4
ENSMUSG00000097184	4632428C04Rik	0.02	0.06	0.06	0.04	0.09	0.02	0	0.02
ENSMUSG00000102705	4632432E15Rik	0	0	0	0	0	0.02	0	0
ENSMUSG00000116184	4632433K11Rik	0	0	0	0	0	0	0	0
ENSMUSG00000105597	4633401B06Rik	0.21	0.19	0.34	0	0.1	0.45	0.32	0.22
ENSMUSG00000097004	4731419I09Rik	0.54	0.67	0.39	0.68	0.42	0.44	0.78	0.33
ENSMUSG00000086943	4732414G09Rik	0.02	0.04	0	0	0.04	0	0.02	0.02
ENSMUSG00000107402	4732416N19Rik	0.2	0.14	0.28	0.16	0.29	0.17	0.1	0.2
ENSMUSG00000097203	4732419C18Rik	0	0	0.03	0.03	0.03	0.03	0	0.05
ENSMUSG00000090031	4732440D04Rik	0.49	0.5	0.67	0.76	0.5	0.59	0.86	0.67
ENSMUSG00000097762	4732463B04Rik	0.04	0.1	0	0.02	0.09	0.06	0	0
ENSMUSG00000101517	4732465J04Rik	0	0	0	0	0	0	0.02	0
ENSMUSG00000053714	4732471J01Rik	0.17	0.18	0.14	0.08	0.17	0.09	0.16	0.26
ENSMUSG00000097488	4732487G21Rik	0.56	0.6	0.76	0.82	0.64	0.61	0.5	0.86
ENSMUSG00000085421	4732490B19Rik	0	0	0	0	0	0	0	0
ENSMUSG00000097350	4732491K20Rik	0.47	0.53	0.34	0.41	0.59	0.48	0.35	0.56
ENSMUSG00000108456	4732496C06Rik	0.09	0.08	0.21	0.33	0.21	0.15	0.25	0.12
ENSMUSG00000110138	4831440D22Rik	0	0	0.04	0	0	0	0.02	0.02
ENSMUSG00000097236	4831440E17Rik	0.17	0.05	0.25	0.21	0.05	0.26	0.34	0.29
ENSMUSG00000107481	4833403J16Rik	0	0	0	0	0	0	0	0
ENSMUSG00000108807	4833404L02Rik	0	0	0	0	0	0	0	0
ENSMUSG00000113544	4833405L11Rik	0	0	0	0	0	0	0	0
ENSMUSG00000097779	4833407H14Rik	0	0	0	0	0	0	0	0
ENSMUSG00000109089	4833411C07Rik	0	0	0	0	0	0	0.05	0.05
ENSMUSG00000097697	4833412C05Rik	0.53	1.18	0.89	0.51	1.07	0.81	0.58	1.31
ENSMUSG00000116298	4833412C15Rik	0.27	0.14	0.03	0.03	0.03	0	0.08	0.03
ENSMUSG00000104018	4833412K13Rik	0	0.2	0.04	0.55	0.33	0.18	0.2	0.12
ENSMUSG00000013562	4833413E03Rik	0	0	0	0	0	0	0	0
ENSMUSG00000104950	4833413G10Rik	0.7	0.46	0.88	0.76	0.55	0.64	0.83	0.45
ENSMUSG00000115936	4833415N18Rik	0.1	0	0.04	0.23	0.09	0.05	0.1	0.05
ENSMUSG00000086015	4833417C18Rik	0.04	0.39	0.16	0	0	0.04	0	0.23
ENSMUSG00000085287	4833418N02Rik	0.74	0.67	0.77	0.53	0.6	0.72	0.55	0.3
ENSMUSG00000052779	4833418N17Rik	0.18	0.08	0	0	0.09	0	0	0
ENSMUSG00000117401	4833419F23Rik	0.96	0.84	1.17	1.17	1.75	1.52	1.57	2.39
ENSMUSG00000116922	4833419O12Rik	0	0	0.05	0	0	0	0	0
ENSMUSG00000062822	4833420G17Rik	7.61	7.11	6.33	6.81	6.94	7.57	7.83	7.36
ENSMUSG00000103996	4833421G17Rik	0	0	0	0	0	0	0	0
ENSMUSG00000108519	4833421K07Rik	0	0	0	0	0	0	0	0
ENSMUSG00000074782	4833422C13Rik	0.23	0.31	0.27	0.2	0.3	0.36	0.31	0.21
ENSMUSG00000097619	4833422M21Rik	0	0.02	0	0	0	0	0	0
ENSMUSG00000075217	4833423E24Rik	0	0	0	0	0	0.02	0	0
ENSMUSG00000092171	4833427F10Rik	0.27	0.3	0	0.15	0	0.22	0.08	0.24
ENSMUSG00000032057	4833427G06Rik	0.47	0.66	0.7	0.45	0.33	0.17	1.07	0.73
ENSMUSG00000097074	4833428L15Rik	0	0	0	0	0	0	0	0
ENSMUSG00000118087	4833438C02Rik	0.84	0.93	1.21	0.59	1.64	1.32	1.18	1.3
ENSMUSG00000025871	4833439L19Rik	26.99	25.86	26.48	27.34	27.14	29.66	23.24	21.97
ENSMUSG00000103103	4833445I07Rik	0.59	0.88	0.7	1.16	0.75	0.86	0.6	0.72
ENSMUSG00000111916	4921501I09Rik	0	0	0	0	0	0	0	0
ENSMUSG00000097626	4921504A21Rik	0.13	0.35	0.22	0.33	0.12	0.23	0.19	0.08
ENSMUSG00000026734	4921504E06Rik	0	0	0	0	0	0	0	0
ENSMUSG00000097650	4921507G05Rik	0.03	0.15	0.13	0.03	0.06	0.03	0	0
ENSMUSG00000029828	4921507P07Rik	0.07	0.1	0.04	0.07	0.02	0.05	0.41	0.17
ENSMUSG00000027345	4921508D12Rik	0	0	0.19	0.05	0	0	0	0
ENSMUSG00000052376	4921508M14Rik	0	0	0	0	0	0	0	0
ENSMUSG00000091147	4921509A06Rik	0	0	0	0	0	0	0	0
ENSMUSG00000061525	4921509C19Rik	0	0	0	0	0	0	0	0
ENSMUSG00000114790	4921509O07Rik	0	0	0	0.08	0	0	0	0
ENSMUSG00000104585	4921511C10Rik	0	0	0.04	0.04	0	0.15	0	0
ENSMUSG00000049815	4921511C20Rik	0	0	0	0	0	0	0	0
ENSMUSG00000104133	4921511E07Rik	0	0	0	0	0	0	0	0
ENSMUSG00000114136	4921511I17Rik	0	0	0	0	0	0	0	0.09
ENSMUSG00000094577	4921511M17Rik	0	0	0	0	0	0	0	0
ENSMUSG00000107042	4921513H07Rik	0	0	0	0	0	0	0	0
ENSMUSG00000044544	4921513I03Rik	0	0.17	0.12	0	0.28	0.25	0.1	0.03
ENSMUSG00000108788	4921513I08Rik	0	0	0	0	0	0	0	0
ENSMUSG00000097620	4921514A10Rik	0.43	0.59	0.32	0.49	0.46	0.31	0.68	0.58
ENSMUSG00000098150	4921515E04Rik	0	0	0	0	0	0	0	0
ENSMUSG00000112406	4921515L22Rik	0.04	0.03	0.1	0.04	0.1	0	0.11	0.04
ENSMUSG00000112652	4921516A02Rik	0	0	0	0	0	0	0	0
ENSMUSG00000116877	4921517D16Rik	0	0	0	0	0	0	0	0
ENSMUSG00000049902	4921517D22Rik	0	0	0	0	0	0	0	0
ENSMUSG00000085851	4921518K17Rik	0	0	0	0	0	0	0	0
ENSMUSG00000114342	4921520N01Rik	0	0	0	0	0	0	0	0.02
ENSMUSG00000104703	4921521D15Rik	0	0	0	0	0.03	0	0	0
ENSMUSG00000114770	4921522A10Rik	0	0	0	0	0	0	0	0
ENSMUSG00000040467	4921522P10Rik	0.11	0	0.02	0	0.03	0	0	0.06
ENSMUSG00000093749	4921523L03Rik	0	0.17	0.18	0.14	0.23	0.18	0.2	0.3
ENSMUSG00000036934	4921524J17Rik	14.3	14.25	11.74	11.29	12.57	13.45	12.36	9.75
ENSMUSG00000039540	4921524L21Rik	0.04	0	0	0	0	0	0	0
ENSMUSG00000113211	4921525O09Rik	0	0	0	0.01	0.04	0	0	0.02
ENSMUSG00000106150	4921527H02Rik	0	0	0	0	0	0	0	0
ENSMUSG00000064299	4921528I07Rik	0.06	0	0.03	0.01	0.01	0.01	0.01	0
ENSMUSG00000108060	4921529L05Rik	0	0	0	0.02	0	0	0	0.04
ENSMUSG00000034689	4921530L21Rik	0	0	0.04	0	0	0	0	0
ENSMUSG00000085704	4921531C22Rik	1.24	1.34	1.56	0.97	0.54	1.1	0.94	0.84
ENSMUSG00000118333	4921531P14Rik	0	0	0	0	0	0	0	0
ENSMUSG00000117460	4921533I20Rik	0	0	0	0	0	0	0	0
ENSMUSG00000110910	4921534A09Rik	0.09	0	0.15	0.04	0.09	0.04	0	0.02
ENSMUSG00000090255	4921534H16Rik	0	0	0	0	0	0	0	0.01
ENSMUSG00000020434	4921536K21Rik	0.24	0.19	0.12	0.17	0.25	0.27	0.27	0.14
ENSMUSG00000028520	4921539E11Rik	0	0	0.06	0	0	0	0	0
ENSMUSG00000104586	4921539H07Rik	0	0	0	0	0	0.01	0	0
ENSMUSG00000047720	4922502D21Rik	0	0	0	0.06	0.06	0.03	0.03	0.1
ENSMUSG00000108128	4922502N22Rik	0	0	0	0	0	0	0	0
ENSMUSG00000110794	4930401A07Rik	0	0	0	0	0	0	0	0
ENSMUSG00000112444	4930401C15Rik	0	0	0	0	0	0	0	0
ENSMUSG00000086352	4930401G09Rik	0.09	0	0	0	0.08	0	0	0
ENSMUSG00000085528	4930401O10Rik	0	0	0	0	0	0	0	0
ENSMUSG00000087460	4930401O12Rik	0	0	0	0	0	0	0	0
ENSMUSG00000104382	4930402C01Rik	0	0	0	0	0	0	0	0
ENSMUSG00000115231	4930402D18Rik	0	0	0	0.07	0	0	0	0
ENSMUSG00000079421	4930402F06Rik	0	0	0	0	0	0	0	0
ENSMUSG00000108885	4930402F11Rik	0	0	0	0	0	0	0	0
ENSMUSG00000107397	4930402H05Rik	0	0.02	0	0.06	0.04	0.06	0	0.02
ENSMUSG00000027309	4930402H24Rik	12.01	12.43	11.02	12.02	10.54	11.5	12.56	12.83
ENSMUSG00000045797	4930402K13Rik	0	0	0	0	0	0	0	0
ENSMUSG00000087122	4930403D09Rik	0	0	0	0	0	0	0	0
ENSMUSG00000116730	4930403O18Rik	0	0	0	0	0	0	0	0
ENSMUSG00000102762	4930403P22Rik	0.32	0.07	0	0.15	0.23	0.23	0.73	0.25
ENSMUSG00000116611	4930404A05Rik	0	0	0	0	0	0	0	0
ENSMUSG00000106082	4930404A12Rik	0	0	0	0	0	0	0	0
ENSMUSG00000113630	4930404H11Rik	0	0	0.11	0	0	0	0.04	0
ENSMUSG00000079001	4930404H24Rik	0	0	0	0	0	0	0	0
ENSMUSG00000087354	4930404I05Rik	0.41	0.25	0.38	0.48	0.25	0.55	0.36	0.39
ENSMUSG00000107679	4930404I20Rik	0	0	0	0	0	0	0	0
ENSMUSG00000115639	4930404K13Rik	0	0	0	0	0	0.07	0	0
ENSMUSG00000020234	4930404N11Rik	0.19	0.11	0.03	0.06	0.06	0	0.03	0.1
ENSMUSG00000115490	4930404O17Rik	0	0	0	0	0	0	0	0
ENSMUSG00000114412	4930405A10Rik	0	0	0	0	0	0	0.07	0
ENSMUSG00000086638	4930405A21Rik	0.05	0.04	0.46	0.29	0.09	0.24	0.1	0.21
ENSMUSG00000116689	4930405D01Rik	0	0	0	0	0	0	0.04	0
ENSMUSG00000085940	4930405D11Rik	0	0	0	0	0	0	0	0
ENSMUSG00000109453	4930405G09Rik	0	0.09	0	0	0	0	0	0
ENSMUSG00000090146	4930405H06Rik	0	0	0	0	0	0	0	0
ENSMUSG00000110754	4930405J17Rik	0	0.08	0	0	0	0	0.09	0
ENSMUSG00000106602	4930405L22Rik	0	0	0	0	0	0	0	0
ENSMUSG00000104705	4930405N21Rik	0	0	0	0	0.04	0	0.05	0
ENSMUSG00000090565	4930405O22Rik	0	0.1	0	0	0	0.05	0	0.06
ENSMUSG00000086923	4930406D18Rik	0	0	0	0	0	0	0.07	0
ENSMUSG00000086713	4930407G08Rik	0	0	0	0	0	0.08	0	0.25
ENSMUSG00000075524	4930407I10Rik	0	0	0	0	0	0	0	0.03
ENSMUSG00000112210	4930407I19Rik	0	0	0	0	0	0	0	0.13
ENSMUSG00000105638	4930408K08Rik	0	0	0	0	0	0	0	0
ENSMUSG00000021101	4930408O17Rik	0	0	0	0	0	0	0	0
ENSMUSG00000086221	4930412B13Rik	0.04	0	0.16	0.09	0.04	0.08	0	0.05
ENSMUSG00000085558	4930412C18Rik	0.1	0.09	0.08	0.06	0.13	0.14	0.15	0.09
ENSMUSG00000102203	4930412E21Rik	0	0	0	0	0	0	0	0
ENSMUSG00000085321	4930412F09Rik	0	0	0.05	0	0	0	0	0
ENSMUSG00000110289	4930412F12Rik	0.58	0.51	0.21	0.19	0.36	0	0.12	0.16
ENSMUSG00000087192	4930412L05Rik	0	0.03	0.1	0.07	0	0.1	0.04	0
ENSMUSG00000051008	4930412M03Rik	0.46	0.31	0.14	0	0	0.1	0.37	0.11
ENSMUSG00000025783	4930412O13Rik	0	0	0	0.08	0	0	0	0
ENSMUSG00000107144	4930413E15Rik	0	0	0	0	0	0	0	0
ENSMUSG00000115526	4930413F20Rik	0	0	0	0	0.1	0	0	0.05
ENSMUSG00000108452	4930413G21Rik	2.06	0.9	1.89	0.38	0.86	1.09	0.88	0.65
ENSMUSG00000116520	4930414F18Rik	0	0	0	0	0	0	0	0
ENSMUSG00000118204	4930414N06Rik	0.2	0.17	0.27	0	0.32	0.42	0.05	0.26
ENSMUSG00000114437	4930415C11Rik	0	0	0	0	0	0	0	0
ENSMUSG00000082344	4930415H17Rik	0	0	0	0	0	0	0	0
ENSMUSG00000035387	4930415L06Rik	0	0	0	0	0	0	0	0.02
ENSMUSG00000117383	4930415O11Rik	0	0	0	0	0	0	0	0
ENSMUSG00000022993	4930415O20Rik	0.61	0.62	1.12	1.56	0.96	0.58	0.73	0.32
ENSMUSG00000087017	4930417H01Rik	0.09	0	0	0	0	0	0	0.06
ENSMUSG00000108129	4930417O13Rik	0	0	0	0	0	0	0.01	0
ENSMUSG00000071818	4930417O22Rik	0	0	0	0	0	0	0	0
ENSMUSG00000087625	4930419G24Rik	0	0	0	0	0	0.1	0	0.06
ENSMUSG00000116885	4930420G21Rik	0	0	0	0	0	0	0	0
ENSMUSG00000104199	4930420N18Rik	0	0	0	0	0	0	0	0
ENSMUSG00000106851	4930421C12Rik	0	0	0	0	0	0	0	0
ENSMUSG00000086422	4930421P07Rik	0	0	0	0	0	0	0	0
ENSMUSG00000110476	4930422C21Rik	0	0	0	0	0	0	0	0
ENSMUSG00000112513	4930422I22Rik	0.04	0.1	0.03	0.04	0.07	0.04	0.04	0
ENSMUSG00000100281	4930422M22Rik	0.06	0	0	0.11	0.17	0	0	0
ENSMUSG00000102249	4930423C22Rik	0	0	0	0	0	0	0	0
ENSMUSG00000113303	4930423D22Rik	0.03	0	0	0	0	0	0	0
ENSMUSG00000112753	4930423D24Rik	0	0	0	0	0	0	0.08	0
ENSMUSG00000086066	4930423M02Rik	0	0	0	0	0	0	0	0
ENSMUSG00000106880	4930425K10Rik	0	0	0	0	0	0	0	0
ENSMUSG00000113605	4930425K24Rik	0	0	0.05	0	0	0	0	0
ENSMUSG00000107396	4930425L21Rik	0	0	0.04	0	0	0	0.12	0
ENSMUSG00000105838	4930425O10Rik	0	0	0	0	0	0	0	0.04
ENSMUSG00000115120	4930425P05Rik	0	0	0	0	0	0	0	0
ENSMUSG00000043168	4930426D05Rik	0	0	0	0.02	0	0	0.02	0
ENSMUSG00000097323	4930426I24Rik	0.09	0	0.17	0.22	0.17	0.22	0.05	0
ENSMUSG00000026736	4930426L09Rik	1.6	1.05	1.74	1.45	0.73	0.78	1.15	1.37
ENSMUSG00000107073	4930428D20Rik	0	0	0.1	0	0	0	0	0
ENSMUSG00000112967	4930428E07Rik	0	0	0	0	0	0	0	0
ENSMUSG00000089887	4930428N03Rik	0	0.01	0	0	0	0	0	0
ENSMUSG00000106333	4930428O21Rik	0	0	0	0	0	0.06	0	0
ENSMUSG00000115286	4930429C20Rik	0	0	0	0	0	0	0	0
ENSMUSG00000104956	4930429D17Rik	0	0	0	0	0	0	0	0
ENSMUSG00000086918	4930429F24Rik	0	0	0.07	0.04	0.07	0.04	0	0.08
ENSMUSG00000108530	4930429H19Rik	0.15	0.29	0.11	0.11	0.06	0.06	0.21	0.09
ENSMUSG00000102144	4930429P21Rik	0	0	0	0.05	0	0	0	0
ENSMUSG00000027157	4930430A15Rik	0	0	0	0	0	0	0	0.05
ENSMUSG00000085295	4930430E12Rik	0.05	0.09	0.09	0	0	0.05	0	0.05
ENSMUSG00000046567	4930430F08Rik	0.85	0.8	0.83	0.71	0.6	0.9	0.75	0.65
ENSMUSG00000115474	4930430F21Rik	0	0	0	0	0	0	0	0
ENSMUSG00000107353	4930430O22Rik	0	0	0	0	0	0	0	0
ENSMUSG00000111494	4930431F10Rik	0	0	0	0	0	0	0	0
ENSMUSG00000062496	4930431F12Rik	0.23	0.2	0.05	0.29	0.07	0.02	0.18	0
ENSMUSG00000105475	4930431L21Rik	0	0	0	0	0	0	0	0
ENSMUSG00000075042	4930431P03Rik	0.05	0	0	0.02	0	0	0	0
ENSMUSG00000109147	4930431P19Rik	0.33	0.47	0.32	0.26	0.36	0.44	0.22	0.38
ENSMUSG00000115709	4930431P22Rik	0	0	0	0	0	0	0	0
ENSMUSG00000097007	4930432B10Rik	0.03	0.11	0.01	0	0	0	0.03	0.02
ENSMUSG00000046958	4930432E11Rik	0.01	0.01	0.01	0.02	0	0	0	0
ENSMUSG00000106594	4930432H08Rik	0	0	0	0.04	0	0	0	0
ENSMUSG00000115727	4930432J09Rik	0	0.02	0.09	0	0.03	0.05	0	0
ENSMUSG00000008129	4930432K21Rik	0.47	0.39	0.41	0.34	0.42	0.31	0.77	0.49
ENSMUSG00000087037	4930432L08Rik	0	0	0	0	0	0	0	0
ENSMUSG00000074248	4930432M17Rik	0	0	0	0	0.05	0	0	0
ENSMUSG00000112846	4930432O09Rik	0	0	0	0	0	0	0	0
ENSMUSG00000102699	4930433B08Rik	0	0	0.32	0	0	0.08	0	0
ENSMUSG00000115720	4930433E05Rik	0	0	0	0	0	0	0	0
ENSMUSG00000091692	4930433I11Rik	0	0	0	0	0	0	0.02	0
ENSMUSG00000103478	4930433J02Rik	0	0	0	0	0	0	0.04	0
ENSMUSG00000042360	4930433N12Rik	0.04	0	0	0	0	0	0	0.04
ENSMUSG00000100850	4930434B07Rik	0	0	0	0	0	0	0	0
ENSMUSG00000111655	4930434F21Rik	0	0	0	0	0	0	0	0
ENSMUSG00000115304	4930434J06Rik	0	0	0	0	0	0	0	0
ENSMUSG00000107839	4930434O05Rik	0	0	0	0	0	0	0	0
ENSMUSG00000102085	4930435C17Rik	0	0	0	0	0	0	0	0
ENSMUSG00000114290	4930435F18Rik	0.03	0	0	0.03	0	0	0	0
ENSMUSG00000115689	4930435M08Rik	0	0	0	0	0	0	0	0
ENSMUSG00000109551	4930435N07Rik	0	0	0	0.03	0	0	0	0.03
ENSMUSG00000105688	4930437M23Rik	0	0	0	0	0	0	0	0
ENSMUSG00000069873	4930438A08Rik	0	0	0	0	0.03	0.05	0.11	0.23
ENSMUSG00000093472	4930438E09Rik	0	0	0	0.14	0	0	0	0
ENSMUSG00000086064	4930439A04Rik	0	0	0	0.06	0	0	0	0
ENSMUSG00000101905	4930439D14Rik	0	0	0	0	0	0	0	0
ENSMUSG00000100518	4930440C22Rik	0	0	0	0	0	0	0	0
ENSMUSG00000085431	4930440I19Rik	0	0	0	0	0	0	0	0
ENSMUSG00000108669	4930441H08Rik	0	0	0	0	0	0	0	0
ENSMUSG00000085405	4930441J16Rik	0	0	0	0	0	0	0	0
ENSMUSG00000113974	4930442G10Rik	0	0	0	0	0	0	0	0
ENSMUSG00000111629	4930442G15Rik	0	0	0	0	0	0	0	0.06
ENSMUSG00000053603	4930442H23Rik	0	0	0	0.09	0	0	0	0
ENSMUSG00000087609	4930442J19Rik	0	0	0	0	0	0	0	0
ENSMUSG00000087223	4930442L01Rik	0	0	0	0	0.03	0	0	0
ENSMUSG00000103608	4930442P19Rik	0.14	0	0	0.18	0.13	0	0	0.09
ENSMUSG00000108147	4930443G03Rik	0	0	0	0	0	0	0	0
ENSMUSG00000086969	4930443O20Rik	0.12	0.24	0.22	0	0	0.11	0.08	0
ENSMUSG00000101674	4930444A19Rik	0	0	0.02	0	0	0	0.02	0
ENSMUSG00000085127	4930444E06Rik	0	0	0	0.04	0	0	0.05	0.05
ENSMUSG00000110737	4930444F02Rik	0	0	0.02	0.01	0	0	0.01	0
ENSMUSG00000069712	4930444G20Rik	0	0	0	0	0	0	0	0
ENSMUSG00000112494	4930444K16Rik	0	0	0	0	0	0	0	0
ENSMUSG00000097172	4930444M15Rik	0	0	0	0	0	0	0	0
ENSMUSG00000067795	4930444P10Rik	0.08	0.02	0.1	0.24	0.05	0.03	0.11	0.06
ENSMUSG00000091061	4930445B16Rik	0	0	0	0	0	0	0	0
ENSMUSG00000115355	4930445E18Rik	0.29	0.06	0.12	0.25	0	0.06	0.17	0.1
ENSMUSG00000115880	4930445N06Rik	0	0	0	0	0	0	0	0
ENSMUSG00000087205	4930445N08Rik	0	0	0	0.17	0	0	0	0
ENSMUSG00000097738	4930445N18Rik	0	0	0.03	0	0.08	0	0	0
ENSMUSG00000022288	4930447A16Rik	0	0	0	0	0	0	0	0
ENSMUSG00000021098	4930447C04Rik	0.14	0.12	0.08	0.13	0.13	0.27	0.17	0.18
ENSMUSG00000107964	4930447C11Rik	0	0	0	0	0	0	0	0
ENSMUSG00000031182	4930447F04Rik	0	0	0	0	0	0	0	0
ENSMUSG00000102224	4930447F24Rik	0.42	0.23	0.97	0.25	0.68	0.4	0.69	0.51
ENSMUSG00000115609	4930447J18Rik	0	0	0	0	0	0	0	0
ENSMUSG00000113591	4930447K03Rik	0	0	0	0.42	0	0	0	0.06
ENSMUSG00000087674	4930447M23Rik	0.03	0	0	0.03	0.24	0.24	0.07	0.17
ENSMUSG00000106583	4930447N08Rik	0	0	0	0	0	0	0	0
ENSMUSG00000108382	4930448A20Rik	0	0	0	0	0	0	0	0
ENSMUSG00000113644	4930448C13Rik	0	0	0	0	0	0	0	0
ENSMUSG00000086824	4930448D08Rik	0.05	0	0	0	0	0	0	0
ENSMUSG00000097463	4930448E22Rik	0.05	0.03	0.15	0.05	0.09	0.07	0.17	0.09
ENSMUSG00000113470	4930448F12Rik	0	0	0	0	0	0	0	0
ENSMUSG00000089879	4930448H16Rik	0	0	0	0	0	0	0	0
ENSMUSG00000104072	4930448I06Rik	0	0	0	0	0	0	0	0
ENSMUSG00000104870	4930448I18Rik	0	0	0	0	0	0	0	0
ENSMUSG00000082843	4930448K20Rik	0	0	0	0	0	0	0	0
ENSMUSG00000074589	4930449A18Rik	0	0	0	0	0	0	0	0
ENSMUSG00000115676	4930449C09Rik	0	0	0	0	0	0	0	0.02
ENSMUSG00000022116	4930449E01Rik	0	0	0	0	0	0	0	0
ENSMUSG00000117684	4930449E18Rik	0	0	0	0	0	0	0	0
ENSMUSG00000105459	4930449I04Rik	0.05	0.09	0.14	0	0.05	0.1	0	0
ENSMUSG00000079093	4930449I24Rik	0	0	0	0	0	0	0	0.05
ENSMUSG00000069223	4930451E10Rik	0.06	0.22	0.12	0	0.12	0.06	0.26	0.07
ENSMUSG00000022543	4930451G09Rik	0.18	0.01	0.12	0.05	0.06	0.08	0.05	0.05
ENSMUSG00000045989	4930451I11Rik	0	0	0	0	0	0	0	0
ENSMUSG00000117264	4930452A19Rik	0	0	0	0	0	0	0	0
ENSMUSG00000021747	4930452B06Rik	0.68	0.86	0.75	0.66	0.54	0.74	0.64	0.72
ENSMUSG00000115422	4930452G13Rik	0	0	0	0	0	0.02	0.1	0.02
ENSMUSG00000112175	4930452L12Rik	0	0	0	0	0.14	0	0	0
ENSMUSG00000099933	4930452N14Rik	0	0	0	0	0	0	0	0
ENSMUSG00000113987	4930453C13Rik	0	0	0	0	0	0	0.15	0
ENSMUSG00000087358	4930453H23Rik	0	0	0	0	0	0	0.03	0
ENSMUSG00000109215	4930453L07Rik	0	0	0	0	0	0	0	0
ENSMUSG00000059920	4930453N24Rik	4.79	5.38	4.52	4.55	4.8	4.53	7.39	6.54
ENSMUSG00000085420	4930453O03Rik	0	0	0.04	0	0	0	0	0
ENSMUSG00000097898	4930455B14Rik	0	0	0	0	0	0	0	0
ENSMUSG00000112654	4930455C13Rik	0.56	0.54	0.46	0.75	1.1	1.33	0.85	0.52
ENSMUSG00000097553	4930455D15Rik	0	0	0	0	0	0	0	0
ENSMUSG00000085761	4930455G09Rik	0	0	0	0	0	0	0	0
ENSMUSG00000080907	4930455H04Rik	0	0	0	0	0	0	0	0
ENSMUSG00000114384	4930455J16Rik	0	0	0.01	0	0	0	0	0.01
ENSMUSG00000114787	4930455M05Rik	0	0	0	0	0.01	0	0	0
ENSMUSG00000102985	4930456G14Rik	0	0	0.04	0.08	0	0	0	0
ENSMUSG00000078618	4930456L15Rik	0	0	0	0	0	0	0	0
ENSMUSG00000105531	4930458A03Rik	0	0	0	0	0	0	0	0
ENSMUSG00000109861	4930458B22Rik	0	0	0	0	0	0	0	0
ENSMUSG00000087611	4930458D05Rik	0.07	0.03	0.09	0.04	0.12	0.11	0.06	0.02
ENSMUSG00000111903	4930458K08Rik	0	0	0	0	0	0	0	0
ENSMUSG00000112762	4930459C07Rik	0	0	0	0.06	0.03	0	0.1	0
ENSMUSG00000105234	4930459L07Rik	0	0	0	0	0	0	0	0
ENSMUSG00000086827	4930461C15Rik	0	0	0	0.13	0	0	0	0
ENSMUSG00000097651	4930461G14Rik	0.07	0	0	0	0	0	0	0
ENSMUSG00000020033	4930463O16Rik	0.11	0	0	0.08	0.05	0	0.03	0
ENSMUSG00000109986	4930465I24Rik	0	0	0	0	0	0	0	0
ENSMUSG00000115063	4930465K09Rik	0.22	0	0	0.21	0	0	0.11	0
ENSMUSG00000056682	4930465K10Rik	0	0	0	0	0	0	0	0
ENSMUSG00000085641	4930465M20Rik	0	0	0.03	0	0	0	0	0
ENSMUSG00000087317	4930466I24Rik	0	0	0	0	0	0	0	0
ENSMUSG00000112332	4930466K18Rik	0.57	0.71	0.4	0.54	1.06	0.42	0.77	1.04
ENSMUSG00000097516	4930467D21Rik	0	0	0	0.04	0	0	0	0
ENSMUSG00000096265	4930467E23Rik	0	0	0	0.04	0	0	0	0
ENSMUSG00000114879	4930467J12Rik	0	0	0	0	0	0	0	0
ENSMUSG00000097370	4930467K11Rik	0	0	0	0	0	0	0	0
ENSMUSG00000068776	4930469B13Rik	0	0	0	0	0	0	0	0
ENSMUSG00000085684	4930469K13Rik	0.55	0.38	1.1	0.42	1.49	2.28	0.06	0.62
ENSMUSG00000104365	4930470B04Rik	0	0	0	0	0	0	0	0
ENSMUSG00000085788	4930470G03Rik	0.02	0	0	0.07	0.02	0	0.02	0
ENSMUSG00000116975	4930470H14Rik	0	0	0	0	0	0	0	0
ENSMUSG00000110406	4930470O06Rik	0	0	0	0	0	0	0	0
ENSMUSG00000043583	4930470P17Rik	0	0	0	0	0	0	0	0
ENSMUSG00000091686	4930471C04Rik	0	0	0	0	0	0	0	0
ENSMUSG00000086138	4930471C06Rik	0	0	0	0	0	0	0	0
ENSMUSG00000097689	4930471D02Rik	0	0	0	0	0	0	0	0
ENSMUSG00000113228	4930471E15Rik	0	0	0	0	0	0	0	0
ENSMUSG00000112716	4930471E19Rik	0.09	0.03	0.24	0	0.08	0.03	0.24	0.12
ENSMUSG00000117852	4930471G03Rik	0	0.05	0	0	0	0	0	0
ENSMUSG00000114509	4930471G24Rik	0	0	0	0	0	0	0	0
ENSMUSG00000117137	4930471L23Rik	0	0	0	0	0	0.09	0	0
ENSMUSG00000097693	4930471M09Rik	0	0.01	0	0	0	0	0	0
ENSMUSG00000060029	4930473A02Rik	0.32	0.46	0.15	0.43	0.15	0.42	0.37	0.29
ENSMUSG00000089934	4930473D10Rik	0	0	0	0	0	0	0	0
ENSMUSG00000113087	4930473H19Rik	0.14	0	0	0	0	0.04	0.19	0
ENSMUSG00000112484	4930473O22Rik	0.04	0	0	0.04	0	0	0	0
ENSMUSG00000103978	4930474B08Rik	0	0	0	0	0	0	0	0
ENSMUSG00000087109	4930474H06Rik	0	0	0	0.03	0	0	0	0
ENSMUSG00000115001	4930474H20Rik	0	0	0	0	0	0	0	0
ENSMUSG00000117328	4930474M22Rik	0.75	0.25	0.17	0.27	0.35	0.62	1.15	0.19
ENSMUSG00000096405	4930474N05Rik	0	0	0.01	0	0	0	0.02	0
ENSMUSG00000113210	4930474N09Rik	0.1	0	0	0	0	0	0	0
ENSMUSG00000097539	4930477E14Rik	0	0	0	0	0	0	0	0
ENSMUSG00000113268	4930477G07Rik	0	0	0	0	0	0	0	0
ENSMUSG00000112155	4930477N07Rik	0	0	0	0	0	0	0	0
ENSMUSG00000104999	4930477O15Rik	0.05	0	0	0	0	0.25	0	0
ENSMUSG00000115245	4930478E11Rik	0	0	0	0	0	0	0	0
ENSMUSG00000097847	4930478K11Rik	0.48	0.7	0.29	0.69	1.2	0.98	0.41	0.41
ENSMUSG00000116628	4930478L05Rik	0	0	0.03	0	0	0.09	0.03	0
ENSMUSG00000106950	4930478M09Rik	0	0	0	0	0	0	0	0
ENSMUSG00000116311	4930478M13Rik	0	0.11	0	0.12	0.36	0	0	0.27
ENSMUSG00000106762	4930478P22Rik	0	0	0	0	0	0	0	0
ENSMUSG00000085238	4930479D17Rik	0.15	0	0	0	0	0.07	0	0
ENSMUSG00000109049	4930479H17Rik	0	0	0	0	0	0	0	0
ENSMUSG00000106768	4930480C01Rik	0	0	0	0	0	0	0	0
ENSMUSG00000035651	4930480E11Rik	0	0.03	0	0	0	0	0	0
ENSMUSG00000086332	4930480G23Rik	0	0	0	0	0	0	0	0
ENSMUSG00000107567	4930480K02Rik	0.27	0.14	0.05	0.16	0	0.15	0.22	0.17
ENSMUSG00000090160	4930480K15Rik	0	0	0	0	0	0	0	0
ENSMUSG00000097284	4930480K23Rik	0.21	0.23	0.19	0.23	0.1	0.22	0.08	0.16
ENSMUSG00000113115	4930480M12Rik	0	0	0	0	0	0	0	0
ENSMUSG00000086938	4930481A15Rik	0.48	0.36	0.7	0.46	0.55	0.75	0.75	0.5
ENSMUSG00000085956	4930481B07Rik	0.31	0.43	0.31	0.26	0.29	0.25	0.47	0.4
ENSMUSG00000047938	4930483J18Rik	0	0	0	0.18	0	0	0.05	0
ENSMUSG00000086241	4930483K19Rik	0.51	0.8	0.59	1.23	0.52	0.39	0.8	0.29
ENSMUSG00000109816	4930483O08Rik	0.06	0	0.05	0.05	0	0	0.06	0
ENSMUSG00000116772	4930483P17Rik	0	0	0	0	0	0	0	0
ENSMUSG00000112832	4930484H19Rik	0	0	0	0	0	0	0.03	0
ENSMUSG00000112493	4930486F22Rik	0	0	0	0	0	0	0	0
ENSMUSG00000089914	4930486I03Rik	0	0	0	0	0.07	0	0	0
ENSMUSG00000050345	4930486L24Rik	0.2	0.1	0	0.08	0	0.08	0.08	0.12
ENSMUSG00000108697	4930486N12Rik	0	0	0	0	0	0	0	0
ENSMUSG00000106932	4930487D11Rik	0	0	0	0	0	0	0	0
ENSMUSG00000092578	4930488B22Rik	0	0	0	0	0	0	0	0
ENSMUSG00000097520	4930488L21Rik	0	0	0	0	0.01	0	0.02	0
ENSMUSG00000110592	4930488N15Rik	0	0	0.03	0	0.07	0	0.07	0.04
ENSMUSG00000099476	4930488N24Rik	0	0	0	0	0.04	0	0	0
ENSMUSG00000117391	4930500A05Rik	0	0.09	0	0	0	0	0.05	0
ENSMUSG00000107214	4930500F04Rik	0	0	0	0	0	0	0	0
ENSMUSG00000097592	4930500F10Rik	0	0	0	0	0.35	0	0.05	0
ENSMUSG00000116976	4930500H12Rik	0	0	0	0	0	0	0	0
ENSMUSG00000106056	4930500L23Rik	0	0	0.07	0	0	0	0	0
ENSMUSG00000044306	4930500M09Rik	0	0	0.07	0	0.17	0.14	0	0
ENSMUSG00000111303	4930502A04Rik	0	0	0	0	0	0	0	0
ENSMUSG00000106584	4930502C17Rik	0	0	0	0	0	0	0	0
ENSMUSG00000086799	4930502E09Rik	0.08	0.2	0.14	0.14	0.21	0	0	0.39
ENSMUSG00000055555	4930502E18Rik	0	0.07	0	0	0.08	0.11	0.08	0
ENSMUSG00000090202	4930503B20Rik	0	0	0	0	0	0	0	0
ENSMUSG00000072595	4930503E14Rik	0	0	0	0	0	0	0	0
ENSMUSG00000112364	4930503E24Rik	0	0	0	0	0	0	0.04	0
ENSMUSG00000115751	4930503F20Rik	0.06	0	0	0	0	0	0	0
ENSMUSG00000082612	4930503H13Rik	0	0	0	0	0	0	0	0
ENSMUSG00000044906	4930503L19Rik	3.98	3.73	4.23	3.95	4.21	3.65	3.21	3.22
ENSMUSG00000103692	4930503O07Rik	0	0	0	0	0	0	0	0
ENSMUSG00000116167	4930504C09Rik	0	0	0	0	0	0	0	0
ENSMUSG00000107926	4930504D19Rik	0	0	0	0	0	0	0	0
ENSMUSG00000040919	4930505A04Rik	0.06	0.45	0.16	0.5	0.38	0.33	0.12	0.42
ENSMUSG00000093551	4930505G20Rik	0	0	0	0	0	0	0	0
ENSMUSG00000109414	4930505K13Rik	0	0	0	0	0	0	0	0
ENSMUSG00000085740	4930505K14Rik	0	0	0	0	0	0	0	0
ENSMUSG00000093540	4930505M18Rik	0	0	0	0	0	0	0	0
ENSMUSG00000097690	4930505N22Rik	0.19	0	0.04	0.05	0.05	0.05	0.05	0
ENSMUSG00000086912	4930505O20Rik	0	0	0	0	0	0	0	0
ENSMUSG00000087478	4930506C21Rik	0.6	0.4	0.29	0.38	0.54	0.84	0.41	0.33
ENSMUSG00000097129	4930507D05Rik	0.12	0.19	0.08	0	0.29	0.09	0.03	0.09
ENSMUSG00000086703	4930507D10Rik	0	0	0	0	0	0	0	0
ENSMUSG00000096986	4930509E16Rik	0.05	0.17	0.09	0.05	0.09	0	0	0
ENSMUSG00000096959	4930509G22Rik	0.18	0.08	0.02	0.22	0.19	0.13	0.49	0.4
ENSMUSG00000105659	4930509H03Rik	0.09	0	0.09	0	0	0.04	0.05	0
ENSMUSG00000102362	4930509J09Rik	0	0	0	0	0	0.04	0	0
ENSMUSG00000087137	4930509K18Rik	0	0	0	0	0	0	0	0
ENSMUSG00000032048	4930510E17Rik	0	0	0	0	0	0	0	0
ENSMUSG00000097841	4930511A02Rik	0	0	0	0	0	0	0	0
ENSMUSG00000108187	4930511E03Rik	0	0	0.02	0	0.02	0	0	0
ENSMUSG00000112940	4930511J24Rik	0	0	0	0	0	0	0	0
ENSMUSG00000086607	4930511M06Rik	0.15	0.1	0.01	0.04	0.13	0.04	0.22	0.1
ENSMUSG00000104791	4930511M18Rik	0	0	0	0.32	0	0	0	0
ENSMUSG00000086698	4930511O05Rik	0	0	0	0	0	0	0	0
ENSMUSG00000020992	4930512B01Rik	0.09	0.1	0.01	0.07	0.17	0.19	0.06	0.05
ENSMUSG00000086866	4930512H18Rik	0	0.15	0.13	0.03	0.23	0.47	0.76	0.55
ENSMUSG00000107622	4930512J16Rik	0	0	0.05	0	0	0.03	0	0
ENSMUSG00000062511	4930512M02Rik	0	0	0	0	0	0	0	0
ENSMUSG00000106125	4930512P04Rik	0	0	0	0	0	0	0.14	0
ENSMUSG00000106741	4930513D17Rik	0	0	0	0	0.04	0	0	0
ENSMUSG00000116491	4930513L16Rik	0	0	0	0	0	0	0	0
ENSMUSG00000074136	4930513N10Rik	0.48	0.45	0.25	0.43	0.31	0.47	0.29	0.42
ENSMUSG00000109225	4930513N20Rik	0	0.08	0	0	0	0	0.05	0
ENSMUSG00000031270	4930513O06Rik	0	0	0	0	0	0	0	0
ENSMUSG00000087045	4930515B02Rik	0	0	0	0	0	0	0	0
ENSMUSG00000092183	4930515G01Rik	1	0.76	0.46	0.79	0.56	0.65	0.6	0.19
ENSMUSG00000049202	4930515G13Rik	0	0	0	0	0	0	0	0
ENSMUSG00000104819	4930515G16Rik	0	0	0	0	0	0	0	0
ENSMUSG00000085157	4930515L19Rik	0	0	0	0	0	0	0	0
ENSMUSG00000097504	4930516B21Rik	0.38	0.21	0.52	0	0.45	0.32	0.19	0.3
ENSMUSG00000090219	4930516K23Rik	0	0	0	0	0	0	0	0
ENSMUSG00000085496	4930517E11Rik	0	0	0	0	0	0	0	0
ENSMUSG00000111246	4930517E14Rik	0.02	0.02	0.14	0.18	0.14	0.02	0.08	0.04
ENSMUSG00000108784	4930517G19Rik	0	0.03	0	0	0	0	0	0
ENSMUSG00000102880	4930517J16Rik	0	0	0	0	0	0	0	0
ENSMUSG00000104225	4930517L18Rik	0	0	0	0	0	0	0	0
ENSMUSG00000116767	4930517M08Rik	0	0	0	0	0	0	0	0
ENSMUSG00000054391	4930517O19Rik	0	0	0.06	0	0	0	0	0
ENSMUSG00000092309	4930518C09Rik	0.12	0.21	0	0	0	0.11	0.12	0.37
ENSMUSG00000074629	4930518I15Rik	0.5	0.53	1.07	0.44	0.37	0.44	0.8	0.92
ENSMUSG00000107924	4930518I17Rik	0	0	0	0	0	0	0	0
ENSMUSG00000103705	4930518J20Rik	0	0	0	0	0	0	0	0
ENSMUSG00000110310	4930518J21Rik	0	0	0	0	0	0	0.1	0
ENSMUSG00000113652	4930518P08Rik	0	0	0	0	0	0	0.1	0
ENSMUSG00000097627	4930519A11Rik	0	0	0	0	0	0	0	0
ENSMUSG00000086263	4930519D14Rik	0	0.04	0	0	0.05	0	0	0
ENSMUSG00000106865	4930519E07Rik	0	0	0	0	0	0	0	0
ENSMUSG00000090126	4930519F09Rik	0	0	0	0	0	0	0	0
ENSMUSG00000031325	4930519F16Rik	0	0	0	0	0.02	0	0	0
ENSMUSG00000101584	4930519F24Rik	0	0	0	0	0	0	0	0
ENSMUSG00000029564	4930519G04Rik	0	0.01	0.01	0	0	0	0	0
ENSMUSG00000105185	4930519H02Rik	0	0	0	0	0	0	0	0
ENSMUSG00000114953	4930519K11Rik	0	0	0	0.1	0.07	0	0	0
ENSMUSG00000105652	4930519L02Rik	0	0	0	0	0	0	0	0
ENSMUSG00000097602	4930519P11Rik	0.17	0.03	0.1	0.13	0.23	0.23	0	0.18
ENSMUSG00000112868	4930520K02Rik	0	0	0	0	0	0	0	0
ENSMUSG00000106127	4930520M14Rik	0.24	0.07	0.15	0.16	0.08	0.08	0.08	0
ENSMUSG00000074039	4930520O04Rik	0.43	0.16	0.13	0.29	0.3	0.38	0.4	0.28
ENSMUSG00000113463	4930520P13Rik	0	0	0	0	0	0	0	0
ENSMUSG00000101701	4930521E06Rik	0.19	0.05	0.06	0	0	0	0	0
ENSMUSG00000112899	4930521O17Rik	0	0	0	0	0	0.11	0	0
ENSMUSG00000060491	4930522H14Rik	0	0	0	0	0	0	0	0
ENSMUSG00000072762	4930522L14Rik	1.61	1.42	0.8	0.36	1.02	0.85	1.3	1.32
ENSMUSG00000029331	4930522N08Rik	0	0	0	0	0	0	0	0
ENSMUSG00000086947	4930522O17Rik	0	0	0.23	0	0	0	0	0
ENSMUSG00000090394	4930523C07Rik	1.02	1.24	0.69	0.62	0.89	0.9	2.02	2.11
ENSMUSG00000115177	4930523O13Rik	0	0	0.03	0	0	0	0	0
ENSMUSG00000020299	4930524B15Rik	0	0	0	0	0	0	0	0
ENSMUSG00000107217	4930524B17Rik	0	0	0	0	0	0	0	0
ENSMUSG00000115320	4930524C18Rik	0	0	0	0	0	0	0	0
ENSMUSG00000059663	4930524N10Rik	0	0	0	0	0	0	0	0
ENSMUSG00000118392	4930524O05Rik	0	0	0	0	0	0	0	0
ENSMUSG00000090207	4930524O07Rik	0.07	0.42	0.07	0.07	0.02	0	0.07	0.02
ENSMUSG00000098627	4930524O08Rik	0	0	0	0	0	0	0	0
ENSMUSG00000112497	4930525C09Rik	0	0	0	0	0	0	0	0
ENSMUSG00000097276	4930525G20Rik	0.06	0.1	0.1	0.09	0.07	0.11	0.16	0.04
ENSMUSG00000085521	4930526A20Rik	0.07	0.03	0.03	0.07	0	0.07	0.07	0.11
ENSMUSG00000087335	4930526F13Rik	0	0	0	0	0	0	0	0
ENSMUSG00000114307	4930526H09Rik	0	0	0	0	0	0	0	0
ENSMUSG00000097091	4930526L06Rik	0	0.05	0	0	0	0	0	0
ENSMUSG00000105251	4930526M16Rik	0	0	0	0	0	0	0	0
ENSMUSG00000086764	4930527A07Rik	0	0	0	0	0	0	0	0
ENSMUSG00000086971	4930527B05Rik	0	0	0	0	0	0	0	0.2
ENSMUSG00000085491	4930527E20Rik	0	0	0.3	0	0	0	0	0
ENSMUSG00000115324	4930527F14Rik	0	0.04	0.12	0	0	0	0.09	0
ENSMUSG00000117554	4930527G23Rik	0	0	0	0	0	0	0	0
ENSMUSG00000070489	4930527J03Rik	0	0	0	0	0	0	0	0
ENSMUSG00000097502	4930528D03Rik	0	0	0	0.03	0	0	0	0
ENSMUSG00000084909	4930528G23Rik	0	0	0	0	0	0	0	0
ENSMUSG00000107681	4930528H21Rik	0	0	0	0	0.32	0	0	0
ENSMUSG00000107012	4930528J11Rik	0	0.01	0	0	0	0	0	0
ENSMUSG00000087309	4930528P14Rik	0	0	0	0	0	0	0	0
ENSMUSG00000086377	4930529C04Rik	0	0	0	0	0	0	0	0
ENSMUSG00000085350	4930529I22Rik	0	0	0	0	0	0	0	0
ENSMUSG00000115271	4930529K09Rik	0	0	0	0	0	0	0	0
ENSMUSG00000113906	4930529N20Rik	0	0	0.07	0	0	0	0	0
ENSMUSG00000097261	4930532G15Rik	0.27	0.13	0.08	0	0.09	0.03	0.12	0.19
ENSMUSG00000112201	4930532I03Rik	0	0	0	0	0	0	0	0
ENSMUSG00000100221	4930532M18Rik	0	0	0	0	0	0	0	0
ENSMUSG00000084798	4930533B01Rik	0.17	0.05	0.15	0.05	0.1	0.05	0.45	0.34
ENSMUSG00000099491	4930533D04Rik	0	0	0.07	0	0	0	0	0
ENSMUSG00000093535	4930533I22Rik	0	0	0	0	0	0	0.02	0
ENSMUSG00000047692	4930533K18Rik	0.23	0.33	0.21	0.04	0.26	0.2	0.26	0.34
ENSMUSG00000104236	4930533L02Rik	0	0	0	0	0	0	0	0
ENSMUSG00000108803	4930533N22Rik	0.01	0	0	0	0	0.01	0	0
ENSMUSG00000100589	4930533P14Rik	0	0	0	0	0	0	0	0
ENSMUSG00000097761	4930534D22Rik	0	0	0	0	0	0	0	0
ENSMUSG00000111544	4930534H03Rik	0	0	0.09	0	0.03	0	0	0
ENSMUSG00000116607	4930534H18Rik	0	0	0	0	0.24	0.16	0	0
ENSMUSG00000102677	4930535E02Rik	0	0	0	0	0	0	0	0
ENSMUSG00000104201	4930535G08Rik	0	0	0	0	0	0	0	0
ENSMUSG00000093619	4930535L15Rik	0.11	0.19	0	0	0.1	0	0	0.44
ENSMUSG00000098360	4930535O05Rik	0	0	0	0	0	0	0.14	0
ENSMUSG00000105350	4930537H20Rik	0.03	0	0.09	0.03	0	0	0	0.03
ENSMUSG00000085516	4930538E20Rik	0.74	0.11	0.11	0.06	0.06	0.29	0	0.06
ENSMUSG00000115719	4930538L07Rik	0	0.07	0	0	0	0	0	0
ENSMUSG00000105765	4930539C22Rik	0	0	0	0	0	0	0	0
ENSMUSG00000048905	4930539E08Rik	0.01	0	0.02	0.02	0	0.09	0.06	0.13
ENSMUSG00000097032	4930539J05Rik	0.2	0.21	0.22	0.36	0.1	0.23	0.59	0.64
ENSMUSG00000103116	4930539M17Rik	0	0	0	0	0	0	0	0
ENSMUSG00000103407	4930540E01Rik	0	0	0	0	0	0	0	0
ENSMUSG00000115047	4930540I17Rik	0	0	0	0	0	0	0	0
ENSMUSG00000111299	4930540M03Rik	0.13	0	0	0	0	0	0	0.13
ENSMUSG00000097831	4930540M05Rik	0.06	0.02	0.05	0.11	0.28	0.03	0	0
ENSMUSG00000090724	4930542C12Rik	0	0	0.09	0	0	0	0.1	0
ENSMUSG00000048628	4930542C16Rik	0	0	0	0	0	0.03	0	0
ENSMUSG00000116848	4930542D17Rik	0	0	0.76	0.28	0	0	0	0
ENSMUSG00000117085	4930542M03Rik	0	0	0	0	0	0	0	0
ENSMUSG00000110009	4930543E12Rik	0	0	0	0	0	0	0.04	0
ENSMUSG00000116171	4930543I03Rik	0	0	0	0	0	0	0	0
ENSMUSG00000112537	4930543I11Rik	0	0	0	0	0	0	0	0
ENSMUSG00000110799	4930543K20Rik	0	0	0	0	0	0	0	0
ENSMUSG00000110037	4930543N07Rik	0	0	0	0	0	0	0	0
ENSMUSG00000087279	4930544D05Rik	0	0	0	0	0	0	0.13	0
ENSMUSG00000115062	4930544F09Rik	0	0	0	0	0	0	0	0
ENSMUSG00000036463	4930544G11Rik	0	0	0	0	0.04	0.04	0.04	0
ENSMUSG00000097071	4930544I03Rik	0	0	0	0	0	0	0.08	0
ENSMUSG00000073803	4930544L04Rik	0	0	0	0	0	0	0	0
ENSMUSG00000051758	4930544M13Rik	0	0	0	0	0	0	0	0
ENSMUSG00000117615	4930545E07Rik	0	0	0	0	0	0	0	0
ENSMUSG00000112157	4930545H06Rik	0	0	0	0	0	0	0	0
ENSMUSG00000111054	4930545L08Rik	0	0	0	0	0	0	0	0
ENSMUSG00000085247	4930545L23Rik	0	0	0.02	0	0	0	0	0
ENSMUSG00000024546	4930546C10Rik	0	0	0	0	0	0	0	0
ENSMUSG00000111767	4930546K05Rik	0	0	0	0	0	0	0	0
ENSMUSG00000086687	4930547E08Rik	0	0	0	0	0.1	0.2	0	0
ENSMUSG00000116894	4930547E14Rik	0	0	0	0	0	0	0	0
ENSMUSG00000112957	4930547H16Rik	0	0	0	0	0.06	0	0.06	0
ENSMUSG00000097890	4930547M16Rik	0.07	0	0.04	0	0	0.07	0	0.07
ENSMUSG00000051198	4930548G14Rik	0	0	0	0	0	0	0	0
ENSMUSG00000029138	4930548H24Rik	0	0	0.02	0.02	0	0.02	0	0
ENSMUSG00000116615	4930548J01Rik	0	0	0	0	0	0	0	0
ENSMUSG00000086257	4930548K13Rik	0	0	0	0	0	0	0	0
ENSMUSG00000114048	4930549C15Rik	0	0	0	0	0	0.04	0	0
ENSMUSG00000118134	4930549G23Rik	0.41	0.96	1.13	0.66	1.23	0.92	1.9	0.57
ENSMUSG00000116984	4930549P19Rik	0	0.02	0	0.03	0	0	0	0
ENSMUSG00000005131	4930550C14Rik	0.11	0.13	0.12	0.18	0.18	0.23	0.11	0.08
ENSMUSG00000097361	4930550C17Rik	0	0	0	0	0	0	0	0
ENSMUSG00000046180	4930550L24Rik	0.03	0	0	0	0	0	0	0
ENSMUSG00000112108	4930551I15Rik	0	0	0	0	0	0	0	0
ENSMUSG00000116674	4930551I23Rik	0	0	0	0	0	0	0	0.06
ENSMUSG00000085377	4930551L18Rik	0	0.28	0	0	0.08	0	0.08	0.08
ENSMUSG00000086430	4930551O13Rik	0.05	0.33	0	0.05	0.15	0.05	0.11	0.11
ENSMUSG00000097632	4930552P12Rik	0	0.02	0.02	0	0.04	0	0	0
ENSMUSG00000116907	4930553E22Rik	0	0	0.1	0	0	0	0	0
ENSMUSG00000105483	4930553I04Rik	0	0	0	0	0	0	0	0
ENSMUSG00000111165	4930553I21Rik	0	0	0	0	0	0	0	0
ENSMUSG00000116983	4930553J12Rik	0	0	0	0.06	0	0	0	0
ENSMUSG00000054351	4930553M12Rik	0	0	0	0	0	0	0	0
ENSMUSG00000106791	4930553P18Rik	0	0	0	0.07	0	0	0	0
ENSMUSG00000099724	4930554C24Rik	0	0	0	0	0	0	0	0
ENSMUSG00000106359	4930554G22Rik	0	0	0	0	0	0	0	0
ENSMUSG00000085452	4930554G24Rik	0	0	0	0	0	0	0.04	0
ENSMUSG00000097682	4930554H23Rik	0	0	0	0	0.02	0	0	0
ENSMUSG00000118047	4930554I06Rik	0	0	0	0	0	0	0	0
ENSMUSG00000106157	4930555A03Rik	0	0	0	0	0	0	0	0.06
ENSMUSG00000086396	4930555B11Rik	0	0	0	0	0	0	0	0
ENSMUSG00000085619	4930555B12Rik	0	0	0	0	0	0	0	0
ENSMUSG00000031559	4930555F03Rik	0	0	0	0	0	0	0.01	0
ENSMUSG00000096197	4930555G01Rik	0	0	0	0	0	0	0	0
ENSMUSG00000112213	4930555G07Rik	0	0	0	0	0	0	0	0
ENSMUSG00000113329	4930555G21Rik	0	0	0	0	0	0	0	0
ENSMUSG00000048559	4930555K19Rik	0	0	0	0	0	0.14	0	0
ENSMUSG00000093557	4930555M17Rik	0	0	0	0	0	0	0	0
ENSMUSG00000085676	4930555O08Rik	0	0	0	0	0	0	0	0
ENSMUSG00000116586	4930556C24Rik	0	0	0.06	0.06	0	0.06	0.06	0
ENSMUSG00000085522	4930556G01Rik	0	0	0	0	0	0	0	0.07
ENSMUSG00000101764	4930556G22Rik	0	0	0.07	0	0	0	0	0
ENSMUSG00000114190	4930556H04Rik	0	0	0.03	0	0	0	0.03	0
ENSMUSG00000089767	4930556I23Rik	0	0	0	0	0	0	0	0
ENSMUSG00000115656	4930556J02Rik	0.02	0	0	0	0	0	0	0
ENSMUSG00000034493	4930556J24Rik	0.05	0.08	0	0	0.04	0	0.24	0
ENSMUSG00000086800	4930556L07Rik	0	0	0	0	0	0.04	0	0
ENSMUSG00000096971	4930556M19Rik	0.3	0.38	0.4	0.33	0.42	0.35	0.36	0.19
ENSMUSG00000111924	4930556N09Rik	0	0	0	0	0	0	0	0
ENSMUSG00000092399	4930556N13Rik	0.06	0.24	0.1	0.32	0.05	0	0	0.17
ENSMUSG00000106191	4930557B06Rik	0	0	0	0	0	0	0	0
ENSMUSG00000115266	4930557F08Rik	0	0	0	0	0	0	0	0
ENSMUSG00000085488	4930557F10Rik	0	0	0	0	0	0	0	0
ENSMUSG00000106902	4930557J02Rik	0	0	0	0	0	0	0	0
ENSMUSG00000108034	4930557K07Rik	3.29	2.19	3.01	2.4	2.51	2.68	2.71	3.25
ENSMUSG00000105734	4930558C23Rik	0	0	0	0	0	0	0	0
ENSMUSG00000106506	4930558F17Rik	0	0	0	0	0	0.07	0	0
ENSMUSG00000086244	4930558G05Rik	0	0	0	0	0	0	0	0
ENSMUSG00000097519	4930558J18Rik	0.3	0.58	0.3	0.4	0.29	0.24	0.14	0.11
ENSMUSG00000075029	4930558J22Rik	0	0	0	0	0	0	0	0
ENSMUSG00000086277	4930558K02Rik	0	0	0	0	0	0.05	0	0
ENSMUSG00000100431	4930558N11Rik	0	0	0	0	0	0	0	0
ENSMUSG00000113164	4930559C10Rik	0	0	0	0	0	0	0	0
ENSMUSG00000109445	4930560O18Rik	0	0	0	0	0	0.03	0	0
ENSMUSG00000086945	4930562A09Rik	0	0	0	0	0	0	0	0
ENSMUSG00000022518	4930562C15Rik	0.06	0.07	0.06	0.12	0.02	0.04	0.27	0.12
ENSMUSG00000086608	4930562D21Rik	0	0.09	0	0	0	0	0.07	0
ENSMUSG00000026729	4930562F07Rik	0.13	0.17	0.12	0.24	0.12	0.18	0.32	0.33
ENSMUSG00000104014	4930562F17Rik	0	0	0	0	0	0	0	0
ENSMUSG00000097387	4930563E18Rik	0	0	0	0.04	0	0	0	0
ENSMUSG00000053574	4930563E22Rik	0.26	0.15	0.19	0.12	0.31	0.21	0.14	0.16
ENSMUSG00000105773	4930563F08Rik	0	0	0	0	0	0	0	0
ENSMUSG00000107656	4930563H07Rik	0	0	0	0	0	0	0	0
ENSMUSG00000086112	4930563I02Rik	0	0	0	0	0	0	0	0
ENSMUSG00000112141	4930563J15Rik	0	0	0	0	0	0	0	0
ENSMUSG00000050702	4930563M21Rik	0.06	0	0	0	0.06	0.03	0	0
ENSMUSG00000116554	4930563N14Rik	0	0	0	0	0	0	0	0
ENSMUSG00000117326	4930564C03Rik	0	0	0	0	0	0	0	0
ENSMUSG00000051788	4930564D02Rik	0	0	0	0	0	0	0	0
ENSMUSG00000104004	4930565D16Rik	0	0	0	0	0	0	0	0
ENSMUSG00000084834	4930565N06Rik	0.8	0.39	0.56	0.47	0.53	0.58	0.43	0.59
ENSMUSG00000107142	4930566F21Rik	0	0	0	0	0	0	0	0
ENSMUSG00000102322	4930566N20Rik	0	0	0	0	0	0	0	0
ENSMUSG00000110629	4930567H12Rik	0.03	0	0.03	0	0	0	0	0
ENSMUSG00000073141	4930567H17Rik	0	0	0	0	0	0	0	0
ENSMUSG00000116982	4930567J20Rik	0	0	0	0	0	0	0	0
ENSMUSG00000109382	4930567K12Rik	0	0	0	0	0	0	0	0
ENSMUSG00000112730	4930567K20Rik	0	0	0	0	0	0.04	0	0
ENSMUSG00000101223	4930568A12Rik	0.09	0	0	0	0.04	0	0	0.05
ENSMUSG00000104638	4930568A13Rik	0	0	0	0	0	0.05	0	0
ENSMUSG00000026882	4930568D16Rik	0	0	0	0	0	0	0	0
ENSMUSG00000111830	4930568E12Rik	0	0	0.07	0	0	0	0	0
ENSMUSG00000102408	4930568G15Rik	0	0	0	0	0	0	0	0
ENSMUSG00000041512	4930569F06Rik	0	0	0	0	0	0	0	0
ENSMUSG00000115337	4930570B17Rik	0	0	0	0	0	0	0	0
ENSMUSG00000084875	4930570D08Rik	0	0	0	0	0	0	0	0
ENSMUSG00000116786	4930570E03Rik	0.03	0	0	0	0	0	0	0
ENSMUSG00000085084	4930570G19Rik	0.03	0.1	0.06	0.03	0.04	0.12	0.07	0.06
ENSMUSG00000089683	4930570N18Rik	0	0	0	0	0.32	0	0	0.18
ENSMUSG00000090457	4930571K23Rik	0	0	0	0	0.02	0	0	0
ENSMUSG00000086467	4930571N24Rik	0	0	0	0	0	0	0	0
ENSMUSG00000115725	4930572G02Rik	0	0	0	0	0	0	0	0
ENSMUSG00000105308	4930572K03Rik	0	0	0	0	0	0	0	0
ENSMUSG00000069720	4930572O03Rik	0	0	0	0	0	0	0	0
ENSMUSG00000114916	4930572O13Rik	0	0	0	0	0	0	0	0
ENSMUSG00000115935	4930573C08Rik	0	0	0	0	0	0	0	0
ENSMUSG00000106020	4930573C15Rik	0	0	0	0	0	0	0	0.3
ENSMUSG00000104766	4930573H18Rik	0	0	0	0	0	0	0	0
ENSMUSG00000104980	4930573I07Rik	0	0	0	0	0	0	0	0
ENSMUSG00000087517	4930577H14Rik	0	0	0	0	0	0	0	0
ENSMUSG00000087440	4930577N17Rik	1.09	1.32	0.64	1.61	0.76	0.7	0.86	1.41
ENSMUSG00000117618	4930578E11Rik	0	0	0	0	0.02	0	0	0
ENSMUSG00000054885	4930578G10Rik	0	0	0	0	0	0	0	0
ENSMUSG00000021961	4930578I06Rik	0	0	0	0	0	0	0	0
ENSMUSG00000104220	4930578I07Rik	0	0	0	0	0	0.04	0	0
ENSMUSG00000097587	4930578M01Rik	0.03	0.03	0.02	0.03	0.01	0.01	0.01	0.02
ENSMUSG00000110586	4930578M07Rik	0	0	0.09	0	0	0	0	0
ENSMUSG00000116695	4930578N18Rik	0	0	0	0	0	0	0	0
ENSMUSG00000074146	4930579C12Rik	0	0	0	0	0	0	0	0
ENSMUSG00000116813	4930579D07Rik	0	0	0	0	0	0	0	0
ENSMUSG00000084971	4930579D09Rik	0	0	0	0	0	0	0	0.13
ENSMUSG00000012042	4930579F01Rik	0	0	0	0.03	0	0	0	0
ENSMUSG00000040840	4930579G18Rik	4.94	5.29	5.16	6.3	5.59	7.14	7.6	7.06
ENSMUSG00000027811	4930579G24Rik	3.67	2.8	2.83	2.43	2.34	2.33	2.18	2.09
ENSMUSG00000101636	4930579H20Rik	0	0	0	0	0	0	0	0
ENSMUSG00000114895	4930579J19Rik	0	0	0	0	0	0	0	0
ENSMUSG00000051074	4930579K19Rik	0.4	0.08	0.29	0.34	0.59	0.25	0.27	0.09
ENSMUSG00000086190	4930579M01Rik	0.18	0	0	0	0	0	0	0
ENSMUSG00000090732	4930579O11Rik	0	0	0	0	0	0	0	0
ENSMUSG00000112924	4930579P08Rik	0	0	0	0	0	0	0	0
ENSMUSG00000106269	4930580E04Rik	0.82	0.14	0.23	0.32	0.16	0.16	0.34	0.26
ENSMUSG00000070315	4930581F22Rik	0.43	0.63	0.43	0.57	0.43	0.55	0.42	0.51
ENSMUSG00000024088	4930583I09Rik	0	0	0.08	0	0	0	0	0
ENSMUSG00000055159	4930583K01Rik	0	0	0	0	0	0.12	0	0
ENSMUSG00000086954	4930583P06Rik	0.08	0	0	0.23	0.15	0.31	0	0
ENSMUSG00000111540	4930584E12Rik	0	0.1	0	0	0	0	0	0
ENSMUSG00000029044	4930584F24Rik	0	0	0	0	0	0	0.03	0
ENSMUSG00000087097	4930586N03Rik	0	0	0	0	0	0	0	0
ENSMUSG00000086009	4930587A21Rik	0	0	0	0	0	0	0	0
ENSMUSG00000107563	4930587E11Rik	0	0	0	0	0	0	0	0
ENSMUSG00000115962	4930588D02Rik	0	0	0	0	0.12	0	0	0
ENSMUSG00000108935	4930588G17Rik	0.12	0.03	0.04	0.11	0	0.07	0.08	0.12
ENSMUSG00000115858	4930588J15Rik	0.03	0	0	0	0	0	0	0
ENSMUSG00000075335	4930588K23Rik	0	0	0	0	0	0.03	0.06	0
ENSMUSG00000068957	4930589L23Rik	0	0	0	0	0.04	0.2	0.04	0
ENSMUSG00000107195	4930589O11Rik	0.43	0.22	0.51	0.41	0.41	0.18	0.38	0.06
ENSMUSG00000085593	4930589P08Rik	0	0	0	0	0	0.05	0	0
ENSMUSG00000103794	4930590H14Rik	0	0	0	0	0	0	0	0
ENSMUSG00000034063	4930590J08Rik	0.15	0.1	0.04	0.04	0.08	0.1	0.07	0.05
ENSMUSG00000106540	4930590L14Rik	0	0	0	0	0	0	0	0
ENSMUSG00000102368	4930590L20Rik	0	0	0	0	0	0	0	0
ENSMUSG00000039138	4930591A17Rik	0	0	0	0	0	0.07	0	0
ENSMUSG00000111234	4930591E09Rik	0	0	0	0	0	0	0	0
ENSMUSG00000115779	4930592A05Rik	0	0	0.05	0.05	0	0	0.06	0.23
ENSMUSG00000105834	4930592C13Rik	0	0	0	0	0.24	0	0	0
ENSMUSG00000118339	4930592I03Rik	0.05	0	0	0	0.04	0.04	0	0
ENSMUSG00000097725	4930593A02Rik	0.11	0.05	0.03	0	0.03	0.05	0.03	0
ENSMUSG00000086365	4930593C16Rik	0.07	0	0	0	0	0	0	0
ENSMUSG00000103948	4930594C11Rik	0	0	0	0	0	0	0	0
ENSMUSG00000097181	4930594M17Rik	0	0	0	0	0	0.05	0	0
ENSMUSG00000075463	4930594M22Rik	0.08	0.11	0.14	0.21	0.16	0.11	0.07	0.08
ENSMUSG00000085423	4930594M22Rik	0	0.19	0.2	0.11	0.1	0.11	0.23	0
ENSMUSG00000085677	4930594O21Rik	0	0	0	0	0	0	0	0
ENSMUSG00000083193	4930595D18Rik	0.07	0	0.19	0	0	0	0	0.07
ENSMUSG00000107929	4930595L18Rik	0	0	0	0	0	0.11	0.11	0
ENSMUSG00000060673	4930595M18Rik	0	0.02	0	0	0	0	0	0
ENSMUSG00000108074	4930595O18Rik	0	0	0	0	0	0	0	0
ENSMUSG00000041068	4930596D02Rik	0	0	0	0	0	0	0.05	0
ENSMUSG00000104900	4930596I21Rik	0	0.11	0	0.24	0	0	0	0.13
ENSMUSG00000086501	4930597A21Rik	0.57	0.21	0.3	0	0.08	0.31	0.25	0.08
ENSMUSG00000115540	4930597G03Rik	0	0.04	0	0	0	0	0	0
ENSMUSG00000104964	4930597L12Rik	0	0	0	0	0	0	0	0
ENSMUSG00000053442	4930597O21Rik	0.27	0.27	0.12	0.64	0.17	0.13	0.59	0.51
ENSMUSG00000097005	4930598A11Rik	0	0	0	0	0	0	0	0
ENSMUSG00000100777	4930598F16Rik	0	0	0	0	0	0	0	0
ENSMUSG00000109160	4930598N05Rik	0	0	0	0	0	0	0	0.03
ENSMUSG00000101600	4930599A14Rik	0	0	0	0	0	0	0	0
ENSMUSG00000073144	4930599N23Rik	0.58	0.51	1.12	0.8	0.55	0.86	2.63	2.01
ENSMUSG00000105545	4930599N24Rik	0	0	0	0	0	0	0	0
ENSMUSG00000031194	4931400O07Rik	0	0	0	0	0	0	0	0
ENSMUSG00000093772	4931403E22Rik	0	0.45	0.08	0.41	0.08	0	0.61	0.97
ENSMUSG00000097329	4931403G20Rik	0.07	0.09	0.03	0.03	0	0.06	0.1	0.03
ENSMUSG00000013353	4931406B18Rik	0	0	0	0	0	0	0.01	0
ENSMUSG00000031938	4931406C07Rik	4.31	4.11	3.83	3.95	4.06	4.24	3.31	3.45
ENSMUSG00000085398	4931406G06Rik	0	0	0	0	0	0.04	0	0.05
ENSMUSG00000066571	4931406P16Rik	10.94	10.83	9.48	9.67	8.68	9.19	10.04	10.6
ENSMUSG00000114352	4931407E12Rik	0	0	0	0	0	0	0	0
ENSMUSG00000073722	4931408C20Rik	0	0	0	0	0	0	0	0
ENSMUSG00000108826	4931412I15Rik	0	0	0	0	0	0	0	0
ENSMUSG00000092602	4931413I07Rik	0	0	0	0.07	0	0	0.08	0
ENSMUSG00000085088	4931413K12Rik	0.89	0.47	0.32	0.3	0.38	0.76	0.72	0.23
ENSMUSG00000022179	4931414P19Rik	2.07	1.7	1.64	1.89	1.46	1.83	2.45	1.91
ENSMUSG00000054910	4931415C17Rik	0.1	0.07	0.14	0.07	0.09	0.04	0.08	0.06
ENSMUSG00000056197	4931417E11Rik	0	0	0	0	0	0	0.05	0
ENSMUSG00000106589	4931419H13Rik	0	0	0.05	0	0	0	0	0
ENSMUSG00000116750	4931420L22Rik	0	0	0	0	0	0	0	0
ENSMUSG00000046085	4931422A03Rik	0.11	0.25	0.42	0.41	0.47	0.27	0.33	0.88
ENSMUSG00000026774	4931423N10Rik	0	0	0	0.03	0	0	0	0
ENSMUSG00000014837	4931428F04Rik	1.49	1.81	2.03	1.97	1.8	1.52	1.22	1.19
ENSMUSG00000086727	4931428L18Rik	0	0	0.01	0	0	0	0	0
ENSMUSG00000056617	4931429L15Rik	0	0	0	0	0.05	0.05	0	0
ENSMUSG00000047324	4931429P17Rik	0	0.02	0	0	0	0	0	0
ENSMUSG00000108354	4931431B13Rik	0.04	0	0	0.08	0.07	0.08	0.12	0
ENSMUSG00000055061	4931431C16Rik	0	0	0	0	0.02	0	0	0
ENSMUSG00000078157	4931440F15Rik	0.02	0	0	0	0.02	0	0	0.02
ENSMUSG00000097775	4931440J10Rik	0.13	0.06	0.06	0.06	0.06	0	0.2	0
ENSMUSG00000074580	4931440P22Rik	0.37	0.16	0.29	0.17	0.08	0.1	0.34	0.08
ENSMUSG00000100733	4932411K12Rik	0	0.01	0.07	0	0	0	0	0.01
ENSMUSG00000058670	4932411N23Rik	0	0	0	0	0	0	0	0
ENSMUSG00000075070	4932412D23Rik	0	0	0	0	0	0	0	0
ENSMUSG00000099616	4932413F04Rik	0	0	0	0	0	0.02	0	0
ENSMUSG00000078962	4932414J04Rik	0	0	0	0	0	0.02	0	0
ENSMUSG00000079324	4932414N04Rik	0	0	0	0	0.01	0.01	0	0
ENSMUSG00000044581	4932415D10Rik	0	0	0	0	0	0	0	0
ENSMUSG00000062036	4932415M13Rik	0	0	0	0	0.02	0	0	0
ENSMUSG00000069925	4932416K20Rik	0	0	0	0	0	0	0	0
ENSMUSG00000105881	4932422M17Rik	0.82	0.96	0.47	0.62	0.32	0.72	0.75	0.6
ENSMUSG00000079513	4932429P05Rik	0	0	0	0	0.02	0	0	0
ENSMUSG00000097135	4932430I15Rik	0	0	0	0	0	0	0	0
ENSMUSG00000104442	4932431L22Rik	0	0	0	0	0	0	0	0
ENSMUSG00000074224	4932431P20Rik	0	0	0.01	0	0.01	0	0.01	0.01
ENSMUSG00000062391	4932435O22Rik	0.02	0	0	0	0	0	0	0
ENSMUSG00000037270	4932438A13Rik	3.57	3.55	3.05	3.32	3.2	3.41	4.21	3.96
ENSMUSG00000039851	4932438H23Rik	0.06	0.03	0.11	0.04	0.09	0.11	0.06	0.04
ENSMUSG00000097216	4932441J04Rik	0.4	0.41	0.25	0.44	0.34	0.48	0.25	0.34
ENSMUSG00000104443	4932442E05Rik	0.4	0.35	0.33	0.44	0.47	0.3	0.38	0.33
ENSMUSG00000086805	4932443L11Rik	0.1	0.05	0.04	0.02	0.13	0.04	0.02	0.02
ENSMUSG00000086796	4932702P03Rik	0.02	0.15	0	0.06	0.01	0.02	0.15	0.03
ENSMUSG00000055357	4933400A11Rik	0	0.04	0	0.16	0.04	0.04	0	0
ENSMUSG00000117364	4933400B14Rik	0.06	0	0	0.06	0.05	0	0	0
ENSMUSG00000101734	4933400C23Rik	0	0	0	0	0	0	0	0
ENSMUSG00000102009	4933400F21Rik	0.03	0	0	0	0	0.03	0	0.03
ENSMUSG00000110336	4933400L20Rik	0	0	0.05	0	0	0	0	0
ENSMUSG00000055700	4933401B06Rik	0	0	0	0	0	0	0	0
ENSMUSG00000116924	4933401D09Rik	0	0.03	0	0	0	0	0	0
ENSMUSG00000106306	4933401H06Rik	0	0	0	0	0	0	0	0
ENSMUSG00000102693	4933401J01Rik	0	0	0	0	0	0	0	0
ENSMUSG00000109197	4933402C05Rik	0	0	0	0	0	0	0	0
ENSMUSG00000102004	4933402C06Rik	0	0	0	0	0	0	0	0
ENSMUSG00000025961	4933402D24Rik	0.03	0.03	0.03	0	0	0.03	0.07	0.07
ENSMUSG00000045330	4933402E13Rik	0	0	0	0	0	0	0	0.03
ENSMUSG00000069971	4933402J07Rik	0	0	0	0	0.04	0	0.04	0.05
ENSMUSG00000106013	4933402J10Rik	0	0	0	0	0	0	0	0
ENSMUSG00000115845	4933402J15Rik	0.07	0.12	0	0	0	0	0.03	0
ENSMUSG00000013668	4933402N03Rik	0	0	0	0	0	0	0	0
ENSMUSG00000067848	4933402N22Rik	0	0	0	0	0	0	0	0
ENSMUSG00000103321	4933403L11Rik	0	0	0	0	0	0	0	0
ENSMUSG00000079460	4933403O08Rik	0	0	0	0	0	0	0	0
ENSMUSG00000116096	4933404G15Rik	0	0	0	0	0	0	0.04	0.04
ENSMUSG00000101153	4933404I11Rik	0	0	0	0	0	0	0.05	0
ENSMUSG00000085122	4933404K08Rik	0	0	0	0	0	0	0	0
ENSMUSG00000111342	4933404K13Rik	0	0	0	0	0	0	0	0
ENSMUSG00000097908	4933404O12Rik	1.43	1.9	1.56	1.49	1.27	1.44	1.18	0.73
ENSMUSG00000097852	4933405D12Rik	0.15	0.03	0.14	0	0	0	0	0
ENSMUSG00000086209	4933405E24Rik	0	0	0	0	0	0	0	0
ENSMUSG00000013158	4933405L10Rik	0	0	0.03	0	0	0	0	0
ENSMUSG00000084234	4933405O20Rik	0	0	0	0	0	0	0.04	0
ENSMUSG00000112421	4933406B15Rik	0	0	0	0	0	0.05	0	0
ENSMUSG00000110427	4933406B17Rik	0	0	0	0	0	0	0	0
ENSMUSG00000097494	4933406C10Rik	0.09	0.08	0.14	0.04	0.06	0.11	0.27	0.07
ENSMUSG00000085796	4933406D12Rik	0	0	0	0	0	0	0	0.08
ENSMUSG00000090585	4933406F09Rik	0	0	0	0	0	0	0.02	0
ENSMUSG00000086025	4933406G16Rik	0.12	0.07	0.11	0.12	0	0.08	0.04	0.08
ENSMUSG00000087475	4933406I18Rik	0.21	0.12	0.16	0	0	0.07	0	0.14
ENSMUSG00000107666	4933406J09Rik	0	0	0	0	0	0.04	0	0
ENSMUSG00000086690	4933406J10Rik	0	0	0	0	0	0	0	0
ENSMUSG00000085820	4933406K04Rik	0	0	0	0	0	0	0	0
ENSMUSG00000107793	4933406L23Rik	0	0	0	0	0	0	0	0
ENSMUSG00000050526	4933406M09Rik	0.58	1.13	0.53	1.08	0.64	0.7	0.16	0.47
ENSMUSG00000069713	4933406P04Rik	0.25	0.28	0.17	0.4	0.27	0.45	0.13	0.23
ENSMUSG00000073759	4933407E24Rik	0.06	0	0	0	0	0	0	0
ENSMUSG00000111836	4933407I05Rik	0	0	0	0	0	0	0	0
ENSMUSG00000084959	4933407I08Rik	0	0	0	0	0	0	0	0
ENSMUSG00000087396	4933407K13Rik	0.71	0.99	0.61	0.8	0.67	0.85	1.1	0.91
ENSMUSG00000026224	4933407L21Rik	0	0	0.05	0.05	0	0.02	0.07	0.04
ENSMUSG00000106136	4933408A14Rik	0	0	0	0	0	0	0	0
ENSMUSG00000049357	4933408B17Rik	0.23	0.39	0.34	0.4	0.2	0.22	0.43	0.29
ENSMUSG00000097407	4933408J17Rik	0.06	0.37	0.17	0.35	0.03	0.32	0.12	0.03
ENSMUSG00000084848	4933408N05Rik	0	0	0	0	0.07	0	0	0.04
ENSMUSG00000104366	4933409D19Rik	0	0	0	0	0	0	0	0
ENSMUSG00000113218	4933409F18Rik	0	0	0	0	0	0	0	0
ENSMUSG00000053896	4933409G03Rik	0	0	0.04	0	0.04	0	0	0
ENSMUSG00000095552	4933409K07Rik	0	0	0	0	0	0	0	0
ENSMUSG00000110876	4933411E02Rik	0	0	0	0	0	0	0	0
ENSMUSG00000099608	4933411E06Rik	0	0	0	0	0	0	0	0
ENSMUSG00000112500	4933411E08Rik	0	0.03	0.06	0	0	0	0.21	0.14
ENSMUSG00000062224	4933411G06Rik	0	0	0	0	0	0	0	0
ENSMUSG00000090369	4933411K16Rik	0.29	0.32	0.08	0.28	0.16	0.31	0.55	0.34
ENSMUSG00000045178	4933411O13Rik	0	0	0	0	0	0	0	0
ENSMUSG00000043623	4933412A08Rik	0	0.04	0	0.04	0	0.12	0.09	0
ENSMUSG00000112627	4933412E12Rik	2.1	2.1	2.56	2.55	2.57	1.78	16.59	16.65
ENSMUSG00000071749	4933412E24Rik	0	0	0	0	0	0	0	0
ENSMUSG00000108227	4933412L11Rik	0	0.1	0	0	0	0	0	0.17
ENSMUSG00000113960	4933412O06Rik	0	0	0	0	0	0	0	0
ENSMUSG00000089952	4933413C19Rik	0.08	0.04	0.02	0.05	0.12	0.22	0.08	0
ENSMUSG00000021874	4933413J09Rik	0.04	0.06	0.19	0.07	0	0.11	0.2	0.13
ENSMUSG00000079048	4933413L06Rik	0	0	0	0	0	0.2	0.05	0
ENSMUSG00000072983	4933414I15Rik	0.02	0	0	0	0	0	0	0
ENSMUSG00000045877	4933415A04Rik	0.06	0.02	0.05	0	0.03	0	0	0
ENSMUSG00000073730	4933415F23Rik	0	0.03	0	0	0	0	0	0.03
ENSMUSG00000105735	4933415J04Rik	0	0	0	0	0	0	0	0
ENSMUSG00000085198	4933416E03Rik	0	0	0	0	0	0.1	0	0
ENSMUSG00000086996	4933416E14Rik	0	0	0	0	0	0	0	0
ENSMUSG00000071763	4933416I08Rik	0	0	0	0	0	0	0	0
ENSMUSG00000097262	4933416M07Rik	0	0	0	0	0.09	0	0	0
ENSMUSG00000113802	4933416O17Rik	0	0	0	0	0	0	0	0
ENSMUSG00000021415	4933417A18Rik	0	0	0	0.09	0	0	0	0
ENSMUSG00000103006	4933417C20Rik	0.06	0	0.03	0.03	0.03	0.03	0	0
ENSMUSG00000097637	4933417D19Rik	0.14	0.2	0.08	0.13	0.09	0	0.09	0.05
ENSMUSG00000101848	4933417E11Rik	0	0	0.14	0	0.05	0	0.05	0
ENSMUSG00000106572	4933417G07Rik	0	0	0.08	0	0	0	0	0
ENSMUSG00000101360	4933417O13Rik	0.06	0.16	0	0	0.03	0.03	0.06	0.03
ENSMUSG00000086443	4933421A08Rik	0.03	0.06	0.03	0.03	0	0.03	0	0
ENSMUSG00000110410	4933421D24Rik	0.04	0.04	0	0	0	0	0	0
ENSMUSG00000030463	4933421I07Rik	0	0	0	0	0	0	0	0
ENSMUSG00000085037	4933421O10Rik	1.95	1.69	1.88	1.52	2.17	1.53	1.05	1.32
ENSMUSG00000111746	4933422A05Rik	0.13	0.04	0.04	0.28	0	0.04	0.13	0.04
ENSMUSG00000108821	4933423L19Rik	0	0	0	0	0	0	0	0
ENSMUSG00000085471	4933423P22Rik	0	0	0.01	0	0.01	0.01	0	0.01
ENSMUSG00000117450	4933424G05Rik	0	0	0.03	0	0.12	0	0.03	0
ENSMUSG00000102416	4933424G06Rik	0.07	0	0.09	0	0	0	0	0.03
ENSMUSG00000105527	4933424H11Rik	0	0	0	0	0	0	0	0
ENSMUSG00000085719	4933424L21Rik	0.05	0	0.04	0	0	0	0	0.1
ENSMUSG00000087289	4933424M12Rik	0	0	0	0.03	0	0	0	0
ENSMUSG00000106766	4933424N20Rik	0	0	0	0	0.04	0	0	0.04
ENSMUSG00000115665	4933425B07Rik	0	0	0.05	0	0	0	0	0
ENSMUSG00000107164	4933425D22Rik	0.13	0.09	0.27	0.22	0.22	0.25	0.13	0.14
ENSMUSG00000021718	4933425L06Rik	0	0	0	0	0	0	0	0
ENSMUSG00000106508	4933425M03Rik	0.07	0.1	0	0	0.07	0.03	0.04	0
ENSMUSG00000116644	4933426B08Rik	0.09	0.08	0	0.08	0.16	0.33	0.09	0.09
ENSMUSG00000086933	4933426K07Rik	0	0	0.03	0	0	0	0	0.04
ENSMUSG00000055403	4933427D06Rik	0.04	0	0	0	0	0	0	0
ENSMUSG00000020807	4933427D14Rik	0.18	0.19	0.12	0.19	0.3	0.2	0.25	0.29
ENSMUSG00000044276	4933427E11Rik	0.37	0.04	0	0.4	0.09	0	0.05	0
ENSMUSG00000033015	4933427E13Rik	0	0	0	0	0	0	0	0
ENSMUSG00000086697	4933427G23Rik	0.32	0.08	0.31	0.09	0.23	0.24	0.07	0.07
ENSMUSG00000073761	4933427I04Rik	0.1	0.11	0	0.1	0.15	0.02	0.11	0.03
ENSMUSG00000085928	4933427I22Rik	0	0	0	0	0	0	0.07	0
ENSMUSG00000087267	4933427J07Rik	0	0	0	0	0	0	0	0
ENSMUSG00000086355	4933428C19Rik	0	0	0.06	0	0	0	0	0
ENSMUSG00000047988	4933428G20Rik	1.04	1.36	0.88	1.03	0.64	1.14	1.34	1.53
ENSMUSG00000042525	4933428M09Rik	0	0	0	0	0	0	0	0
ENSMUSG00000105203	4933428P19Rik	0	0	0.11	0.24	0.04	0	0	0.04
ENSMUSG00000097786	4933429H19Rik	0	0.15	0.21	0.05	0.05	0	0	0.18
ENSMUSG00000115008	4933429O19Rik	0	0	0	0	0	0	0	0
ENSMUSG00000110116	4933430A20Rik	0	0	0	0	0	0	0	0
ENSMUSG00000107172	4933430H06Rik	0	0	0.04	0	0.04	0	0	0
ENSMUSG00000109106	4933430H16Rik	0	0	0	0	0	0.04	0	0
ENSMUSG00000058046	4933430I17Rik	0.13	0.08	0.15	0.21	0.18	0.03	0.2	0.2
ENSMUSG00000108523	4933430L12Rik	0	0	0	0	0	0	0	0
ENSMUSG00000086892	4933430M04Rik	0	0	0	0	0	0	0	0
ENSMUSG00000108848	4933430N04Rik	0	0	0	0	0	0	0	0.02
ENSMUSG00000108923	4933431C10Rik	0.99	1.1	0.9	0.6	1.48	0.55	0.92	0.88
ENSMUSG00000086968	4933431E20Rik	1.61	1.48	1.72	1.37	1.63	1.66	0.98	1.36
ENSMUSG00000108709	4933431G14Rik	0.07	0	0.09	0	0	0.1	0	0.07
ENSMUSG00000115774	4933431J24Rik	0	0	0	0	0	0	0.02	0
ENSMUSG00000103715	4933431K14Rik	0.67	1.18	0.77	0.48	0.44	0.68	0.56	0.65
ENSMUSG00000086451	4933431K23Rik	0.2	0.14	0.08	0.15	0.13	0.16	0.05	0.08
ENSMUSG00000107496	4933431M02Rik	0	0	0	0	0	0	0	0
ENSMUSG00000111843	4933432G23Rik	0.07	0	0	0	0	0	0	0
ENSMUSG00000114980	4933432I03Rik	0	0	0	0	0	0	0	0
ENSMUSG00000116557	4933432I09Rik	0	0	0	0	0	0	0	0
ENSMUSG00000108811	4933432K03Rik	0	0	0	0	0	0	0.02	0
ENSMUSG00000097044	4933433F19Rik	0	0	0	0	0	0	0	0
ENSMUSG00000111807	4933433G08Rik	0	0	0	0	0	0	0	0
ENSMUSG00000097021	4933433G15Rik	0.28	0.27	0.09	0.42	0.18	0.09	0.22	0.19
ENSMUSG00000114362	4933433G19Rik	0.09	0.52	0.28	0.64	0.31	0.54	0.29	0.59
ENSMUSG00000117571	4933433H22Rik	0.03	0.06	0.06	0.18	0.03	0.09	0.1	0.1
ENSMUSG00000113227	4933433N18Rik	0	0	0	0	0	0	0	0
ENSMUSG00000027942	4933434E20Rik	6.05	5.96	5.12	5.66	5.53	5.37	5.45	5.49
ENSMUSG00000020624	4933434M16Rik	0	0	0	0	0	0	0	0
ENSMUSG00000117650	4933435E02Rik	0	0	0	0	0	0	0	0
ENSMUSG00000086978	4933435F18Rik	0	0	0	0	0	0	0	0
ENSMUSG00000108345	4933435G04Rik	0	0	0	0	0	0	0	0
ENSMUSG00000103844	4933436E23Rik	0	0	0	0	0	0	0	0
ENSMUSG00000104380	4933436F18Rik	0	0	0	0	0	0	0	0
ENSMUSG00000108924	4933436H12Rik	0	0	0	0	0	0	0	0
ENSMUSG00000025288	4933436I01Rik	0	0.03	0	0	0	0	0	0
ENSMUSG00000100580	4933436I20Rik	0	0	0	0	0	0	0	0
ENSMUSG00000114746	4933436N17Rik	0	0	0	0	0	0	0	0
ENSMUSG00000112623	4933436P19Rik	0	0	0	0	0	0	0	0
ENSMUSG00000104719	4933437G19Rik	0.1	0	0.18	0.32	0.05	0.05	0.05	0.15
ENSMUSG00000086160	4933438A12Rik	0	0	0	0	0	0	0	0
ENSMUSG00000105490	4933438B17Rik	0	0	0	0	0	0	0	0
ENSMUSG00000093617	4933438K21Rik	0	0	0	0	0	0	0	0
ENSMUSG00000072893	4933439C10Rik	0.67	0.93	0.56	0.71	0.67	0.59	0.91	0.93
ENSMUSG00000107322	4933439J24Rik	0	0	0	0	0	0	0	0
ENSMUSG00000085184	4933439K11Rik	0.06	0.03	0	0.02	0.07	0	0	0.12
ENSMUSG00000107830	4933439N06Rik	0	0	0	0	0	0	0	0
ENSMUSG00000109582	4933439N14Rik	0	0	0	0	0	0	0	0
ENSMUSG00000097082	4933440J02Rik	0	0	0	0	0	0	0	0
ENSMUSG00000045928	4933440M02Rik	0	0.03	0	0.02	0.01	0	0	0
ENSMUSG00000042087	4933440N22Rik	2.36	2.78	1.68	2.09	2.6	2.13	2.23	1.78
ENSMUSG00000051940	5031410I06Rik	0	0	0	0	0	0	0	0
ENSMUSG00000097282	5031415H12Rik	0	0	0.04	0	0.06	0.02	0	0.02
ENSMUSG00000073147	5031425E22Rik	3.51	2.61	2.71	3.25	2.88	2.84	2.89	2.89
ENSMUSG00000085129	5031425F14Rik	0.03	0	0	0	0.1	0.05	0	0
ENSMUSG00000044574	5031434C07Rik	0	0	0.03	0.02	0.02	0	0	0
ENSMUSG00000097885	5031434O11Rik	0.27	0.49	0.42	0.29	0.24	0.32	0.61	0.49
ENSMUSG00000036046	5031439G07Rik	10.51	10.54	13.87	12.88	10.8	11.5	10.48	10.11
ENSMUSG00000096932	5033403F01Rik	0.17	0.18	0.22	0.13	0.16	0.16	0.24	0.18
ENSMUSG00000106352	5033403H07Rik	0	0	0	0	0	0	0	0
ENSMUSG00000102185	5033404E19Rik	0	0	0	0	0	0	0	0
ENSMUSG00000113769	5033406O09Rik	0.13	0.16	0.23	0	0	0.12	0.19	0.1
ENSMUSG00000097251	5033417F24Rik	0.32	0.11	0.03	0.21	0.18	0.45	0.58	0.53
ENSMUSG00000112276	5033421B08Rik	0.18	0.12	0.29	0.3	0.26	0.09	0.28	0.56
ENSMUSG00000081618	5033423K11Rik	0	0	0	0	0	0	0	0
ENSMUSG00000112981	5033424D13Rik	0	0	0	0	0	0	0.72	0.82
ENSMUSG00000111468	5033425B01Rik	0	0	0	0	0	0	0	0.05
ENSMUSG00000110625	5033426E14Rik	0	0	0	0	0	0	0	0
ENSMUSG00000097097	5033426O07Rik	0	0.02	0	0	0	0.02	0	0
ENSMUSG00000097910	5033428I22Rik	0.11	0.07	0.07	0.08	0.05	0.05	0.11	0.04
ENSMUSG00000038152	5033430I15Rik	1.2	1.72	1.42	1.37	1.86	2.16	0.61	1.61
[truncated: 53,574 more rows]
